# Supplementary material
Source: ML conference proceedings conference paper supplement (https://aclanthology.org/2024.lrec-main.1501)
Supplement: OptionalSupplementaryMaterial [file 2024.lrec-main.1501.OptionalSupplementaryMaterial.zip]

## Sheet: Sheet1
	claim_id	claim	claim_label	sentence_id	sentence	prefix_sentence_2	prefix_sentence_1	suffix_sentence_1	suffix_sentence_2	1	2	3	4	5	6	7	8	9	10	11	12	1a	1b	1c	3a	4a	4b	4c	4d	7a	7b	8a	8b	9a	9b	9c	9d	9e	10a	10b	10c	10d	11a	11b	11c	11d	11e	12a	12b
0	snes-01017	Production of the flu shot caused the influenza virus to mutate into a more virulent strain, driving the deadly 2017-2018 flu season.	false	0	Bottom of Form ABC: Experts say flu shot potentially caused the flu epidemic (Shocker, in mainstream no less)			By Erin Elizabeth - (Note from Erin: Just a heads up-	this is not a CDC doctor quoted below.	0	0	0	0	0	0	0	0	0	0	1	0	0	0	0	0	0	0	0	0	0	0	0	0	0	0	0	0	0	0	0	0	0	0	0	1	0	0	0	0
1	snes-01017	Production of the flu shot caused the influenza virus to mutate into a more virulent strain, driving the deadly 2017-2018 flu season.	false	1	By Erin Elizabeth - (Note from Erin: Just a heads up-		Bottom of Form ABC: Experts say flu shot potentially caused the flu epidemic (Shocker, in mainstream no less)	this is not a CDC doctor quoted below.	Far too many people have looked up the fake news Snopes article, which was written well before this nurse was even quoted.	0	0	0	0	0	0	0	0	0	0	0	0	0	0	0	0	0	0	0	0	0	0	0	0	0	0	0	0	0	0	0	0	0	0	0	0	0	0	0	0
2	snes-01017	Production of the flu shot caused the influenza virus to mutate into a more virulent strain, driving the deadly 2017-2018 flu season.	false	2	this is not a CDC doctor quoted below.	Bottom of Form ABC: Experts say flu shot potentially caused the flu epidemic (Shocker, in mainstream no less)	By Erin Elizabeth - (Note from Erin: Just a heads up-	Far too many people have looked up the fake news Snopes article, which was written well before this nurse was even quoted.	<b>That has nothing to do with this story.	0	0	0	0	0	0	0	0	0	0	0	0	0	0	0	0	0	0	0	0	0	0	0	0	0	0	0	0	0	0	0	0	0	0	0	0	0	0	0	0
3	snes-01017	Production of the flu shot caused the influenza virus to mutate into a more virulent strain, driving the deadly 2017-2018 flu season.	false	3	Far too many people have looked up the fake news Snopes article, which was written well before this nurse was even quoted.	By Erin Elizabeth - (Note from Erin: Just a heads up-	this is not a CDC doctor quoted below.	<b>That has nothing to do with this story.	<b>	0	0	0	0	0	0	0	0	0	0	0	0	0	0	0	0	0	0	0	0	0	0	0	0	0	0	0	0	0	0	0	0	0	0	0	0	0	0	0	0
4	snes-01017	Production of the flu shot caused the influenza virus to mutate into a more virulent strain, driving the deadly 2017-2018 flu season.	false	4	<b>That has nothing to do with this story.	this is not a CDC doctor quoted below.	Far too many people have looked up the fake news Snopes article, which was written well before this nurse was even quoted.	<b>	This is someone from the health department.	0	0	0	0	0	0	0	0	0	0	1	0	0	0	0	0	0	0	0	0	0	0	0	0	0	0	0	0	0	0	0	0	0	0	0	0	1	0	0	0
5	snes-01017	Production of the flu shot caused the influenza virus to mutate into a more virulent strain, driving the deadly 2017-2018 flu season.	false	5	<b>	Far too many people have looked up the fake news Snopes article, which was written well before this nurse was even quoted.	<b>That has nothing to do with this story.	This is someone from the health department.	The comments below reflect that people are NOT reading the story.	0	0	0	0	0	0	0	0	0	0	1	0	0	0	0	0	0	0	0	0	0	0	0	0	0	0	0	0	0	0	0	0	0	0	0	0	1	0	0	0
6	snes-01017	Production of the flu shot caused the influenza virus to mutate into a more virulent strain, driving the deadly 2017-2018 flu season.	false	6	This is someone from the health department.	<b>That has nothing to do with this story.	<b>	The comments below reflect that people are NOT reading the story.	We talked at length with the editor who interviewed the health department official that gave the quote.	0	0	0	0	0	0	0	0	0	0	1	0	0	0	0	0	0	0	0	0	0	0	0	0	0	0	0	0	0	0	0	0	0	0	0	0	1	0	0	0
7	snes-01017	Production of the flu shot caused the influenza virus to mutate into a more virulent strain, driving the deadly 2017-2018 flu season.	false	7	The comments below reflect that people are NOT reading the story.	<b>	This is someone from the health department.	We talked at length with the editor who interviewed the health department official that gave the quote.	They confirmed she did make the surprising statement.	0	0	0	0	0	0	0	0	0	0	1	0	0	0	0	0	0	0	0	0	0	0	0	0	0	0	0	0	0	0	0	0	0	1	0	0	0	0	0	0
8	snes-01017	Production of the flu shot caused the influenza virus to mutate into a more virulent strain, driving the deadly 2017-2018 flu season.	false	8	We talked at length with the editor who interviewed the health department official that gave the quote.	This is someone from the health department.	The comments below reflect that people are NOT reading the story.	They confirmed she did make the surprising statement.	You can see it's reflected in their headline as well, which raised eyebrows.	0	0	0	0	0	0	0	0	0	0	0	0	0	0	0	0	0	0	0	0	0	0	0	0	0	0	0	0	0	0	0	0	0	0	0	0	0	0	0	0
9	snes-01017	Production of the flu shot caused the influenza virus to mutate into a more virulent strain, driving the deadly 2017-2018 flu season.	false	9	They confirmed she did make the surprising statement.	The comments below reflect that people are NOT reading the story.	We talked at length with the editor who interviewed the health department official that gave the quote.	You can see it's reflected in their headline as well, which raised eyebrows.	They too received much feedback about this controversial headline, which many PhDs in science and MDs have said they fully support - minus the part about receiving the vaccination regardless of the inefficacy.	0	0	0	0	0	0	0	0	0	0	0	0	0	0	0	0	0	0	0	0	0	0	0	0	0	0	0	0	0	0	0	0	0	0	0	0	0	0	0	0
10	snes-01017	Production of the flu shot caused the influenza virus to mutate into a more virulent strain, driving the deadly 2017-2018 flu season.	false	10	You can see it's reflected in their headline as well, which raised eyebrows.	We talked at length with the editor who interviewed the health department official that gave the quote.	They confirmed she did make the surprising statement.	They too received much feedback about this controversial headline, which many PhDs in science and MDs have said they fully support - minus the part about receiving the vaccination regardless of the inefficacy.	Thank you in advance.	0	0	0	0	0	0	0	0	0	0	0	0	0	0	0	0	0	0	0	0	0	0	0	0	0	0	0	0	0	0	0	0	0	0	0	0	0	0	0	0
11	snes-01017	Production of the flu shot caused the influenza virus to mutate into a more virulent strain, driving the deadly 2017-2018 flu season.	false	11	They too received much feedback about this controversial headline, which many PhDs in science and MDs have said they fully support - minus the part about receiving the vaccination regardless of the inefficacy.	They confirmed she did make the surprising statement.	You can see it's reflected in their headline as well, which raised eyebrows.	Thank you in advance.	Founder, Erin Elizabeth)	0	0	0	0	0	0	0	0	0	0	0	0	0	0	0	0	0	0	0	0	0	0	0	0	0	0	0	0	0	0	0	0	0	0	0	0	0	0	0	0
12	snes-01017	Production of the flu shot caused the influenza virus to mutate into a more virulent strain, driving the deadly 2017-2018 flu season.	false	12	Thank you in advance.	You can see it's reflected in their headline as well, which raised eyebrows.	They too received much feedback about this controversial headline, which many PhDs in science and MDs have said they fully support - minus the part about receiving the vaccination regardless of the inefficacy.	Founder, Erin Elizabeth)	According to the CDC (Centers for Disease Control and Prevention), this year's flu is rampant in 49 states, with Wisconsin and Minnesota being hit especially hard.	0	0	0	0	0	0	0	0	0	0	0	0	0	0	0	0	0	0	0	0	0	0	0	0	0	0	0	0	0	0	0	0	0	0	0	0	0	0	0	0
13	snes-01017	Production of the flu shot caused the influenza virus to mutate into a more virulent strain, driving the deadly 2017-2018 flu season.	false	13	Founder, Erin Elizabeth)	They too received much feedback about this controversial headline, which many PhDs in science and MDs have said they fully support - minus the part about receiving the vaccination regardless of the inefficacy.	Thank you in advance.	According to the CDC (Centers for Disease Control and Prevention), this year's flu is rampant in 49 states, with Wisconsin and Minnesota being hit especially hard.	And one nurse thinks she knows why.	0	0	0	0	0	0	0	0	0	0	0	1	0	0	0	0	0	0	0	0	0	0	0	0	0	0	0	0	0	0	0	0	0	0	0	0	0	0	1	0
14	snes-01017	Production of the flu shot caused the influenza virus to mutate into a more virulent strain, driving the deadly 2017-2018 flu season.	false	14	According to the CDC (Centers for Disease Control and Prevention), this year's flu is rampant in 49 states, with Wisconsin and Minnesota being hit especially hard.	Thank you in advance.	Founder, Erin Elizabeth)	And one nurse thinks she knows why.	While part of the blame lies with <b> the dominant flu strain this year, H3N2, which tends to be more severe and causes more severe symptoms than most other strains <b> 1 it also potentially lies with us: "I believe that the low effective rate of the vaccine this year is due to the mutations that the virus made in the processing of the vaccine itself," said Anna Treague, nurse for Public Health.	0	0	0	0	0	0	0	0	0	0	0	1	0	0	0	0	0	0	0	0	0	0	0	0	0	0	0	0	0	0	0	0	0	0	0	0	0	0	1	0
15	snes-01017	Production of the flu shot caused the influenza virus to mutate into a more virulent strain, driving the deadly 2017-2018 flu season.	false	15	And one nurse thinks she knows why.	Founder, Erin Elizabeth)	According to the CDC (Centers for Disease Control and Prevention), this year's flu is rampant in 49 states, with Wisconsin and Minnesota being hit especially hard.	While part of the blame lies with <b> the dominant flu strain this year, H3N2, which tends to be more severe and causes more severe symptoms than most other strains <b> 1 it also potentially lies with us: "I believe that the low effective rate of the vaccine this year is due to the mutations that the virus made in the processing of the vaccine itself," said Anna Treague, nurse for Public Health.	"That is at LEAST part of the reason that influenza cases are so widespread this year."	0	0	0	0	0	0	0	0	0	0	0	1	0	0	0	0	0	0	0	0	0	0	0	0	0	0	0	0	0	0	0	0	0	0	0	0	0	0	0	0
16	snes-01017	Production of the flu shot caused the influenza virus to mutate into a more virulent strain, driving the deadly 2017-2018 flu season.	false	16	While part of the blame lies with <b> the dominant flu strain this year, H3N2, which tends to be more severe and causes more severe symptoms than most other strains <b> 1 it also potentially lies with us: "I believe that the low effective rate of the vaccine this year is due to the mutations that the virus made in the processing of the vaccine itself," said Anna Treague, nurse for Public Health.	According to the CDC (Centers for Disease Control and Prevention), this year's flu is rampant in 49 states, with Wisconsin and Minnesota being hit especially hard.	And one nurse thinks she knows why.	"That is at LEAST part of the reason that influenza cases are so widespread this year."	2 (That being said, Treague still thinks everyone should get a flu shot...	0	0	0	0	0	0	0	0	1	0	1	1	0	0	0	0	0	0	0	0	0	0	0	0	0	0	1	0	0	0	0	0	0	0	0	0	1	0	1	0
17	snes-01017	Production of the flu shot caused the influenza virus to mutate into a more virulent strain, driving the deadly 2017-2018 flu season.	false	17	"That is at LEAST part of the reason that influenza cases are so widespread this year."	And one nurse thinks she knows why.	While part of the blame lies with <b> the dominant flu strain this year, H3N2, which tends to be more severe and causes more severe symptoms than most other strains <b> 1 it also potentially lies with us: "I believe that the low effective rate of the vaccine this year is due to the mutations that the virus made in the processing of the vaccine itself," said Anna Treague, nurse for Public Health.	2 (That being said, Treague still thinks everyone should get a flu shot...	Really?	0	0	0	0	0	0	0	0	1	0	1	0	0	0	0	0	0	0	0	0	0	0	0	0	0	0	1	0	0	0	0	0	0	1	0	0	0	0	0	0
18	snes-01017	Production of the flu shot caused the influenza virus to mutate into a more virulent strain, driving the deadly 2017-2018 flu season.	false	18	2 (That being said, Treague still thinks everyone should get a flu shot...	While part of the blame lies with <b> the dominant flu strain this year, H3N2, which tends to be more severe and causes more severe symptoms than most other strains <b> 1 it also potentially lies with us: "I believe that the low effective rate of the vaccine this year is due to the mutations that the virus made in the processing of the vaccine itself," said Anna Treague, nurse for Public Health.	"That is at LEAST part of the reason that influenza cases are so widespread this year."	Really?	You've got to be kidding us.	0	0	0	0	0	0	0	0	1	0	0	0	0	0	0	0	0	0	0	0	0	0	0	0	0	0	1	0	0	0	0	0	0	0	0	0	0	0	0	0
19	snes-01017	Production of the flu shot caused the influenza virus to mutate into a more virulent strain, driving the deadly 2017-2018 flu season.	false	19	Really?	"That is at LEAST part of the reason that influenza cases are so widespread this year."	2 (That being said, Treague still thinks everyone should get a flu shot...	You've got to be kidding us.	The cognitive dissonance is shocking.)	0	0	0	0	0	0	0	0	0	0	0	0	0	0	0	0	0	0	0	0	0	0	0	0	0	0	0	0	0	0	0	0	0	0	0	0	0	0	0	0
20	snes-01017	Production of the flu shot caused the influenza virus to mutate into a more virulent strain, driving the deadly 2017-2018 flu season.	false	20	You've got to be kidding us.	2 (That being said, Treague still thinks everyone should get a flu shot...	Really?	The cognitive dissonance is shocking.)	The Health Department official says it's at LEAST part of the problem, if not the whole problem, and other experts agree.	0	0	0	0	0	0	0	0	0	0	0	0	0	0	0	0	0	0	0	0	0	0	0	0	0	0	0	0	0	0	0	0	0	0	0	0	0	0	0	0
21	snes-01017	Production of the flu shot caused the influenza virus to mutate into a more virulent strain, driving the deadly 2017-2018 flu season.	false	21	The cognitive dissonance is shocking.)	Really?	You've got to be kidding us.	The Health Department official says it's at LEAST part of the problem, if not the whole problem, and other experts agree.	Dr Mercola (his video is below), who has had the #1 health site- worldwide- for 20 years, agrees, "It's no surprise at all", he says.	0	0	0	0	0	0	0	0	0	0	0	0	0	0	0	0	0	0	0	0	0	0	0	0	0	0	0	0	0	0	0	0	0	0	0	0	0	0	0	0
22	snes-01017	Production of the flu shot caused the influenza virus to mutate into a more virulent strain, driving the deadly 2017-2018 flu season.	false	22	The Health Department official says it's at LEAST part of the problem, if not the whole problem, and other experts agree.	You've got to be kidding us.	The cognitive dissonance is shocking.)	Dr Mercola (his video is below), who has had the #1 health site- worldwide- for 20 years, agrees, "It's no surprise at all", he says.	We have countless other MDs and PhDs who concur as well.	0	0	0	0	0	0	0	0	0	0	1	0	0	0	0	0	0	0	0	0	0	0	0	0	0	0	0	0	0	0	0	0	0	1	0	0	0	0	0	0
23	snes-01017	Production of the flu shot caused the influenza virus to mutate into a more virulent strain, driving the deadly 2017-2018 flu season.	false	23	Dr Mercola (his video is below), who has had the #1 health site- worldwide- for 20 years, agrees, "It's no surprise at all", he says.	The cognitive dissonance is shocking.)	The Health Department official says it's at LEAST part of the problem, if not the whole problem, and other experts agree.	We have countless other MDs and PhDs who concur as well.	As doctors continue to give the dangerous shot and the virus mutates, more people will get sick and the epidemic will worsen.	0	0	0	0	0	0	0	0	0	0	0	1	0	0	0	0	0	0	0	0	0	0	0	0	0	0	0	0	0	0	0	0	0	0	0	0	0	0	1	0
24	snes-01017	Production of the flu shot caused the influenza virus to mutate into a more virulent strain, driving the deadly 2017-2018 flu season.	false	24	We have countless other MDs and PhDs who concur as well.	The Health Department official says it's at LEAST part of the problem, if not the whole problem, and other experts agree.	Dr Mercola (his video is below), who has had the #1 health site- worldwide- for 20 years, agrees, "It's no surprise at all", he says.	As doctors continue to give the dangerous shot and the virus mutates, more people will get sick and the epidemic will worsen.	It's like a bad sci-fi movie.	0	0	0	0	0	0	0	0	0	0	0	1	0	0	0	0	0	0	0	0	0	0	0	0	0	0	0	0	0	0	0	0	0	0	0	0	0	0	0	0
25	snes-01017	Production of the flu shot caused the influenza virus to mutate into a more virulent strain, driving the deadly 2017-2018 flu season.	false	25	As doctors continue to give the dangerous shot and the virus mutates, more people will get sick and the epidemic will worsen.	Dr Mercola (his video is below), who has had the #1 health site- worldwide- for 20 years, agrees, "It's no surprise at all", he says.	We have countless other MDs and PhDs who concur as well.	It's like a bad sci-fi movie.	Why does she want you to get it?	0	0	0	0	0	0	0	0	0	0	0	0	0	0	0	0	0	0	0	0	0	0	0	0	0	0	0	0	0	0	0	0	0	0	0	0	0	0	0	0
26	snes-01017	Production of the flu shot caused the influenza virus to mutate into a more virulent strain, driving the deadly 2017-2018 flu season.	false	26	It's like a bad sci-fi movie.	We have countless other MDs and PhDs who concur as well.	As doctors continue to give the dangerous shot and the virus mutates, more people will get sick and the epidemic will worsen.	Why does she want you to get it?	Because "Even if the flu vaccine isn't as effective as it has been in year's past, it does help.	0	0	0	0	0	0	0	0	0	0	0	1	0	0	0	0	0	0	0	0	0	0	0	0	0	0	0	0	0	0	0	0	0	0	0	0	0	0	0	1
27	snes-01017	Production of the flu shot caused the influenza virus to mutate into a more virulent strain, driving the deadly 2017-2018 flu season.	false	27	Why does she want you to get it?	As doctors continue to give the dangerous shot and the virus mutates, more people will get sick and the epidemic will worsen.	It's like a bad sci-fi movie.	Because "Even if the flu vaccine isn't as effective as it has been in year's past, it does help.	Some protection is better than no protection.	0	0	0	0	0	0	0	0	0	0	0	1	0	0	0	0	0	0	0	0	0	0	0	0	0	0	0	0	0	0	0	0	0	0	0	0	0	0	0	1
28	snes-01017	Production of the flu shot caused the influenza virus to mutate into a more virulent strain, driving the deadly 2017-2018 flu season.	false	28	Because "Even if the flu vaccine isn't as effective as it has been in year's past, it does help.	It's like a bad sci-fi movie.	Why does she want you to get it?	Some protection is better than no protection.	"3	0	0	0	0	0	0	0	0	0	0	0	0	0	0	0	0	0	0	0	0	0	0	0	0	0	0	0	0	0	0	0	0	0	0	0	0	0	0	0	0
29	snes-01017	Production of the flu shot caused the influenza virus to mutate into a more virulent strain, driving the deadly 2017-2018 flu season.	false	29	Some protection is better than no protection.	Why does she want you to get it?	Because "Even if the flu vaccine isn't as effective as it has been in year's past, it does help.	"3	(Oh and even if it potentially causing the epidemic too?) WATCH THIS VIRAL VIDEO, TOO.	0	0	0	0	0	0	0	0	0	0	0	0	0	0	0	0	0	0	0	0	0	0	0	0	0	0	0	0	0	0	0	0	0	0	0	0	0	0	0	0
30	snes-01017	Production of the flu shot caused the influenza virus to mutate into a more virulent strain, driving the deadly 2017-2018 flu season.	false	30	"3	Because "Even if the flu vaccine isn't as effective as it has been in year's past, it does help.	Some protection is better than no protection.	(Oh and even if it potentially causing the epidemic too?) WATCH THIS VIRAL VIDEO, TOO.	Yes, it might be a little over the top	0	0	0	0	0	0	0	0	0	0	0	0	0	0	0	0	0	0	0	0	0	0	0	0	0	0	0	0	0	0	0	0	0	0	0	0	0	0	0	0
31	snes-01017	Production of the flu shot caused the influenza virus to mutate into a more virulent strain, driving the deadly 2017-2018 flu season.	false	31	(Oh and even if it potentially causing the epidemic too?) WATCH THIS VIRAL VIDEO, TOO.	Some protection is better than no protection.	"3	Yes, it might be a little over the top	but I was on fire!	0	0	0	0	0	0	0	0	1	0	1	1	0	0	0	0	0	0	0	0	0	0	0	0	0	0	0	0	1	0	0	0	0	1	0	0	0	0	0	1
32	snes-01017	Production of the flu shot caused the influenza virus to mutate into a more virulent strain, driving the deadly 2017-2018 flu season.	false	32	Yes, it might be a little over the top	"3	(Oh and even if it potentially causing the epidemic too?) WATCH THIS VIRAL VIDEO, TOO.	but I was on fire!	According to Treague, at both the beginning and end of a person's life, the immune system isn't strong, so the body has to work harder to fight off viruses.	0	0	0	0	0	0	0	0	0	1	0	0	0	0	0	0	0	0	0	0	0	0	0	0	0	0	0	0	0	0	0	0	0	0	0	0	0	0	0	0
33	snes-01017	Production of the flu shot caused the influenza virus to mutate into a more virulent strain, driving the deadly 2017-2018 flu season.	false	33	but I was on fire!	(Oh and even if it potentially causing the epidemic too?) WATCH THIS VIRAL VIDEO, TOO.	Yes, it might be a little over the top	According to Treague, at both the beginning and end of a person's life, the immune system isn't strong, so the body has to work harder to fight off viruses.	And that's why even though the shot is only 10% effective this year, at best, it's still worth your time getting.	0	0	0	0	0	0	0	0	0	1	0	0	0	0	0	0	0	0	0	0	0	0	0	0	0	0	0	0	0	0	0	0	0	0	0	0	0	0	0	0
34	snes-01017	Production of the flu shot caused the influenza virus to mutate into a more virulent strain, driving the deadly 2017-2018 flu season.	false	34	According to Treague, at both the beginning and end of a person's life, the immune system isn't strong, so the body has to work harder to fight off viruses.	Yes, it might be a little over the top	but I was on fire!	And that's why even though the shot is only 10% effective this year, at best, it's still worth your time getting.	(I wonder how the parents and loved ones of those who have received the shot and died anyway feel about that?)	0	0	0	0	0	0	0	0	0	0	0	0	0	0	0	0	0	0	0	0	0	0	0	0	0	0	0	0	0	0	0	0	0	0	0	0	0	0	0	0
35	snes-01017	Production of the flu shot caused the influenza virus to mutate into a more virulent strain, driving the deadly 2017-2018 flu season.	false	35	And that's why even though the shot is only 10% effective this year, at best, it's still worth your time getting.	but I was on fire!	According to Treague, at both the beginning and end of a person's life, the immune system isn't strong, so the body has to work harder to fight off viruses.	(I wonder how the parents and loved ones of those who have received the shot and died anyway feel about that?)		0	0	0	0	0	0	0	0	0	0	0	0	0	0	0	0	0	0	0	0	0	0	0	0	0	0	0	0	0	0	0	0	0	0	0	0	0	0	0	0
36	snes-01017	Production of the flu shot caused the influenza virus to mutate into a more virulent strain, driving the deadly 2017-2018 flu season.	false	36	(I wonder how the parents and loved ones of those who have received the shot and died anyway feel about that?)	According to Treague, at both the beginning and end of a person's life, the immune system isn't strong, so the body has to work harder to fight off viruses.	And that's why even though the shot is only 10% effective this year, at best, it's still worth your time getting.			0	0	0	0	0	0	0	0	0	0	0	1	0	0	0	0	0	0	0	0	0	0	0	0	0	0	0	0	0	0	0	0	0	0	0	0	0	0	0	1
37	tron-02249	HIV Blood in a Ketchup Dispenser at a Fast Food Restaurant	false	0	Scary Please Read!!!!!!!!!!!!!!			SEND THIS TO AS MANY PEOPLE AS POSSIBLE.	PEOPLE ARE SICK.	0	0	0	0	0	0	0	0	0	1	1	1	0	0	0	0	0	0	0	0	0	0	0	0	0	0	0	0	0	0	0	0	1	1	0	0	0	1	0	0
38	tron-02249	HIV Blood in a Ketchup Dispenser at a Fast Food Restaurant	false	1	SEND THIS TO AS MANY PEOPLE AS POSSIBLE.		Scary Please Read!!!!!!!!!!!!!!	PEOPLE ARE SICK.	This is something you may want to take note of: ONLY USE KETCHUP FROM THE PACKET IN FAST FOOD OUTLETS!!	0	0	0	0	0	0	0	0	0	0	1	1	0	0	0	0	0	0	0	0	0	0	0	0	0	0	0	0	0	0	0	0	0	1	0	0	0	0	0	0
39	tron-02249	HIV Blood in a Ketchup Dispenser at a Fast Food Restaurant	false	2	PEOPLE ARE SICK.	Scary Please Read!!!!!!!!!!!!!!	SEND THIS TO AS MANY PEOPLE AS POSSIBLE.	This is something you may want to take note of: ONLY USE KETCHUP FROM THE PACKET IN FAST FOOD OUTLETS!!	A man was caught placing blood in the ketchup dispenser at a fast food outlet (to remain unnamed) within the last month.	0	0	0	0	0	0	0	0	0	0	1	0	0	0	0	0	0	0	0	0	0	0	0	0	0	0	0	0	0	0	0	0	0	1	0	0	0	0	0	0
40	tron-02249	HIV Blood in a Ketchup Dispenser at a Fast Food Restaurant	false	3	This is something you may want to take note of: ONLY USE KETCHUP FROM THE PACKET IN FAST FOOD OUTLETS!!	SEND THIS TO AS MANY PEOPLE AS POSSIBLE.	PEOPLE ARE SICK.	A man was caught placing blood in the ketchup dispenser at a fast food outlet (to remain unnamed) within the last month.	It is believed that he is HIV+.	1	0	0	0	0	0	0	0	0	0	1	0	1	0	0	0	0	0	0	0	0	0	0	0	0	0	0	0	0	0	0	0	0	1	0	0	0	0	0	0
41	tron-02249	HIV Blood in a Ketchup Dispenser at a Fast Food Restaurant	false	4	A man was caught placing blood in the ketchup dispenser at a fast food outlet (to remain unnamed) within the last month.	PEOPLE ARE SICK.	This is something you may want to take note of: ONLY USE KETCHUP FROM THE PACKET IN FAST FOOD OUTLETS!!	It is believed that he is HIV+.	So be sure to let your friends/family know...only use items that come in a closed packet.	1	0	0	0	0	0	0	0	0	0	0	0	1	0	0	0	0	0	0	0	0	0	0	0	0	0	0	0	0	0	0	0	0	0	0	0	0	0	0	0
42	tron-02249	HIV Blood in a Ketchup Dispenser at a Fast Food Restaurant	false	5	It is believed that he is HIV+.	This is something you may want to take note of: ONLY USE KETCHUP FROM THE PACKET IN FAST FOOD OUTLETS!!	A man was caught placing blood in the ketchup dispenser at a fast food outlet (to remain unnamed) within the last month.	So be sure to let your friends/family know...only use items that come in a closed packet.		0	0	0	0	0	0	0	0	0	0	0	1	0	0	0	0	0	0	0	0	0	0	0	0	0	0	0	0	0	0	0	0	0	0	0	0	0	0	0	0
43	tron-02249	HIV Blood in a Ketchup Dispenser at a Fast Food Restaurant	false	6	So be sure to let your friends/family know...only use items that come in a closed packet.	A man was caught placing blood in the ketchup dispenser at a fast food outlet (to remain unnamed) within the last month.	It is believed that he is HIV+.			0	0	0	0	0	0	0	0	0	0	1	1	0	0	0	0	0	0	0	0	0	0	0	0	0	0	0	0	0	0	0	0	0	0	0	0	0	1	0	0
45	tron-01386	Vitamin-C and Shrimp are a poisonous combination	false	1	[Collected via e-mail, February 2014] I can't believe it is true.			The message goes with a teenager died suddenly with blood swell out of her mouth, nose, ears, and eyes.	The autopsy found that the girl had consumed a lot of shrimps and took vitamin C at the same time before her death.	0	0	0	0	0	0	0	0	0	0	0	0	0	0	0	0	0	0	0	0	0	0	0	0	0	0	0	0	0	0	0	0	0	0	0	0	0	0	0	0
46	tron-01386	Vitamin-C and Shrimp are a poisonous combination	false	2	The message goes with a teenager died suddenly with blood swell out of her mouth, nose, ears, and eyes.		[Collected via e-mail, February 2014] I can't believe it is true.	The autopsy found that the girl had consumed a lot of shrimps and took vitamin C at the same time before her death.	The shrimp and vitamin C in her digestion system combined the arsenic chemical AsO5 from the shrimp and the acid from vitamin C to produce the fatal cyanide As2O3.	1	0	0	0	0	0	0	0	0	1	0	0	1	0	0	0	0	0	0	0	0	0	0	0	0	0	0	0	0	1	0	0	0	0	0	0	0	0	0	0
47	tron-01386	Vitamin-C and Shrimp are a poisonous combination	false	3	The autopsy found that the girl had consumed a lot of shrimps and took vitamin C at the same time before her death.	[Collected via e-mail, February 2014] I can't believe it is true.	The message goes with a teenager died suddenly with blood swell out of her mouth, nose, ears, and eyes.	The shrimp and vitamin C in her digestion system combined the arsenic chemical AsO5 from the shrimp and the acid from vitamin C to produce the fatal cyanide As2O3.	So, beware, not to eat shrimp and vitamin C at the same time.	1	0	0	0	0	0	0	0	0	0	0	0	1	0	0	0	0	0	0	0	0	0	0	0	0	0	0	0	0	0	0	0	0	0	0	0	0	0	0	0
48	tron-01386	Vitamin-C and Shrimp are a poisonous combination	false	4	The shrimp and vitamin C in her digestion system combined the arsenic chemical AsO5 from the shrimp and the acid from vitamin C to produce the fatal cyanide As2O3.	The message goes with a teenager died suddenly with blood swell out of her mouth, nose, ears, and eyes.	The autopsy found that the girl had consumed a lot of shrimps and took vitamin C at the same time before her death.	So, beware, not to eat shrimp and vitamin C at the same time.		0	0	0	0	0	0	1	0	1	0	0	0	0	0	0	0	0	0	0	0	0	0	0	0	0	0	1	0	0	0	0	0	0	0	0	0	0	0	0	0
49	tron-01386	Vitamin-C and Shrimp are a poisonous combination	false	5	So, beware, not to eat shrimp and vitamin C at the same time.	The autopsy found that the girl had consumed a lot of shrimps and took vitamin C at the same time before her death.	The shrimp and vitamin C in her digestion system combined the arsenic chemical AsO5 from the shrimp and the acid from vitamin C to produce the fatal cyanide As2O3.			0	0	0	0	0	0	0	0	0	1	0	0	0	0	0	0	0	0	0	0	0	0	0	0	0	0	0	0	0	0	0	0	1	0	0	0	0	0	0	0
50	snes-01547	Manuka honey, as a topical treatment, is better than all known antibiotics.	false	0	Study: Manuka honey kills more bacteria than all available antibiotics Not all honey is created equal.			While the benefits of raw, unprocessed honey have been well-documented over the centuries, Australian researchers have found one type of honey, called Manuka honey, to be better than all known antibiotics.	Manuka honey is produced by bees that forage on the nectar of Leptospermum Scoparium, or New Zealand's Manuka bush, as well as tea trees, native to Australia and New Zealand only.	0	0	0	0	0	0	0	0	0	0	0	0	0	0	0	0	0	0	0	0	0	0	0	0	0	0	0	0	0	0	0	0	0	0	0	0	0	0	0	0
51	snes-01547	Manuka honey, as a topical treatment, is better than all known antibiotics.	false	1	While the benefits of raw, unprocessed honey have been well-documented over the centuries, Australian researchers have found one type of honey, called Manuka honey, to be better than all known antibiotics.		Study: Manuka honey kills more bacteria than all available antibiotics Not all honey is created equal.	Manuka honey is produced by bees that forage on the nectar of Leptospermum Scoparium, or New Zealand's Manuka bush, as well as tea trees, native to Australia and New Zealand only.	This remarkable type of honey not only effectively kills bacteria, but none of the bugs killed by it have been able to build up immunity.	0	0	0	0	0	0	0	1	0	0	0	1	0	0	0	0	0	0	0	0	0	0	1	0	0	0	0	0	0	0	0	0	0	0	0	0	0	0	0	0
52	snes-01547	Manuka honey, as a topical treatment, is better than all known antibiotics.	false	2	Manuka honey is produced by bees that forage on the nectar of Leptospermum Scoparium, or New Zealand's Manuka bush, as well as tea trees, native to Australia and New Zealand only.	Study: Manuka honey kills more bacteria than all available antibiotics Not all honey is created equal.	While the benefits of raw, unprocessed honey have been well-documented over the centuries, Australian researchers have found one type of honey, called Manuka honey, to be better than all known antibiotics.	This remarkable type of honey not only effectively kills bacteria, but none of the bugs killed by it have been able to build up immunity.	In a world where many of the last resort antibiotics are failing against antibiotic-resistant superbugs, Manuka honey may hold the key to fighting resistance issues, saving thousands of lives worldwide.	0	0	0	0	0	0	0	0	0	0	0	1	0	0	0	0	0	0	0	0	0	0	0	0	0	0	0	0	0	0	0	0	0	0	0	0	0	0	0	0
53	snes-01547	Manuka honey, as a topical treatment, is better than all known antibiotics.	false	3	This remarkable type of honey not only effectively kills bacteria, but none of the bugs killed by it have been able to build up immunity.	While the benefits of raw, unprocessed honey have been well-documented over the centuries, Australian researchers have found one type of honey, called Manuka honey, to be better than all known antibiotics.	Manuka honey is produced by bees that forage on the nectar of Leptospermum Scoparium, or New Zealand's Manuka bush, as well as tea trees, native to Australia and New Zealand only.	In a world where many of the last resort antibiotics are failing against antibiotic-resistant superbugs, Manuka honey may hold the key to fighting resistance issues, saving thousands of lives worldwide.	Manuka honey fights superbugs Dr. Dee Carter from the University of Sydney's School of Molecular and Microbial Biosciences noted that antibiotics not only have short shelf lives, but the bacteria they attack quickly become resistant as well, making them useless over time.	0	0	0	0	0	0	0	1	0	0	0	0	0	0	0	0	0	0	0	0	0	0	1	0	0	0	0	0	0	0	0	0	0	0	0	0	0	0	0	0
54	snes-01547	Manuka honey, as a topical treatment, is better than all known antibiotics.	false	4	In a world where many of the last resort antibiotics are failing against antibiotic-resistant superbugs, Manuka honey may hold the key to fighting resistance issues, saving thousands of lives worldwide.	Manuka honey is produced by bees that forage on the nectar of Leptospermum Scoparium, or New Zealand's Manuka bush, as well as tea trees, native to Australia and New Zealand only.	This remarkable type of honey not only effectively kills bacteria, but none of the bugs killed by it have been able to build up immunity.	Manuka honey fights superbugs Dr. Dee Carter from the University of Sydney's School of Molecular and Microbial Biosciences noted that antibiotics not only have short shelf lives, but the bacteria they attack quickly become resistant as well, making them useless over time.	The report, published in the European Journal of Clinical Microbiology and Infectious Diseases, claimed that Manuka honey killed almost every bacteria and pathogen it was tested on.	0	0	0	0	0	0	0	1	0	0	0	0	0	0	0	0	0	0	0	0	0	0	1	0	0	0	0	0	0	0	0	0	0	0	0	0	0	0	0	0
55	snes-01547	Manuka honey, as a topical treatment, is better than all known antibiotics.	false	5	Manuka honey fights superbugs Dr. Dee Carter from the University of Sydney's School of Molecular and Microbial Biosciences noted that antibiotics not only have short shelf lives, but the bacteria they attack quickly become resistant as well, making them useless over time.	This remarkable type of honey not only effectively kills bacteria, but none of the bugs killed by it have been able to build up immunity.	In a world where many of the last resort antibiotics are failing against antibiotic-resistant superbugs, Manuka honey may hold the key to fighting resistance issues, saving thousands of lives worldwide.	The report, published in the European Journal of Clinical Microbiology and Infectious Diseases, claimed that Manuka honey killed almost every bacteria and pathogen it was tested on.	Unlike all antibiotics available on today's market, none of the bugs tested were able to survive the honey treatment.	0	0	0	0	0	0	0	0	0	0	0	1	0	0	0	0	0	0	0	0	0	0	0	0	0	0	0	0	0	0	0	0	0	0	0	0	0	0	1	0
56	snes-01547	Manuka honey, as a topical treatment, is better than all known antibiotics.	false	6	The report, published in the European Journal of Clinical Microbiology and Infectious Diseases, claimed that Manuka honey killed almost every bacteria and pathogen it was tested on.	In a world where many of the last resort antibiotics are failing against antibiotic-resistant superbugs, Manuka honey may hold the key to fighting resistance issues, saving thousands of lives worldwide.	Manuka honey fights superbugs Dr. Dee Carter from the University of Sydney's School of Molecular and Microbial Biosciences noted that antibiotics not only have short shelf lives, but the bacteria they attack quickly become resistant as well, making them useless over time.	Unlike all antibiotics available on today's market, none of the bugs tested were able to survive the honey treatment.	According to Dr. Carter, there are particular compounds, like methylglyoxal, in the Manuka honey that cause multi-system failure in the bacteria, killing them before they are able to adapt and build up immunity.	0	0	0	0	0	0	1	0	0	0	0	1	0	0	0	0	0	0	0	0	1	0	0	0	0	0	0	0	0	0	0	0	0	0	0	0	0	0	1	0
57	snes-01547	Manuka honey, as a topical treatment, is better than all known antibiotics.	false	7	Unlike all antibiotics available on today's market, none of the bugs tested were able to survive the honey treatment.	Manuka honey fights superbugs Dr. Dee Carter from the University of Sydney's School of Molecular and Microbial Biosciences noted that antibiotics not only have short shelf lives, but the bacteria they attack quickly become resistant as well, making them useless over time.	The report, published in the European Journal of Clinical Microbiology and Infectious Diseases, claimed that Manuka honey killed almost every bacteria and pathogen it was tested on.	According to Dr. Carter, there are particular compounds, like methylglyoxal, in the Manuka honey that cause multi-system failure in the bacteria, killing them before they are able to adapt and build up immunity.	What Manuka honey can do for you Manuka's biological properties range from antioxidant, anti-inflammatory, antibacterial, antiviral, antibiotic and wound healing, to immune-stimulatory.	0	0	0	0	0	0	0	0	0	0	0	0	0	0	0	0	0	0	0	0	0	0	0	0	0	0	0	0	0	0	0	0	0	0	0	0	0	0	0	0
58	snes-01547	Manuka honey, as a topical treatment, is better than all known antibiotics.	false	8	According to Dr. Carter, there are particular compounds, like methylglyoxal, in the Manuka honey that cause multi-system failure in the bacteria, killing them before they are able to adapt and build up immunity.	The report, published in the European Journal of Clinical Microbiology and Infectious Diseases, claimed that Manuka honey killed almost every bacteria and pathogen it was tested on.	Unlike all antibiotics available on today's market, none of the bugs tested were able to survive the honey treatment.	What Manuka honey can do for you Manuka's biological properties range from antioxidant, anti-inflammatory, antibacterial, antiviral, antibiotic and wound healing, to immune-stimulatory.	However, what separates Manuka honey from the rest is that its antibacterial powers challenge even the toughest superbugs, such as the life-threatening methicillin-resistant Staphylococcus aureus (MRSA).	0	0	0	0	0	0	1	0	0	0	0	0	0	0	0	0	0	0	0	0	1	0	0	0	0	0	0	0	0	0	0	0	0	0	0	0	0	0	0	0
59	snes-01547	Manuka honey, as a topical treatment, is better than all known antibiotics.	false	9	What Manuka honey can do for you Manuka's biological properties range from antioxidant, anti-inflammatory, antibacterial, antiviral, antibiotic and wound healing, to immune-stimulatory.	Unlike all antibiotics available on today's market, none of the bugs tested were able to survive the honey treatment.	According to Dr. Carter, there are particular compounds, like methylglyoxal, in the Manuka honey that cause multi-system failure in the bacteria, killing them before they are able to adapt and build up immunity.	However, what separates Manuka honey from the rest is that its antibacterial powers challenge even the toughest superbugs, such as the life-threatening methicillin-resistant Staphylococcus aureus (MRSA).	Manuka honey is marketed for cancer treatment and prevention, high cholesterol, chronic inflammation, diabetes, the treatment of gastrointestinal problems, and eye, ear and sinus infections.	0	0	0	0	0	0	0	0	0	0	0	0	0	0	0	0	0	0	0	0	0	0	0	0	0	0	0	0	0	0	0	0	0	0	0	0	0	0	0	0
60	snes-01547	Manuka honey, as a topical treatment, is better than all known antibiotics.	false	10	However, what separates Manuka honey from the rest is that its antibacterial powers challenge even the toughest superbugs, such as the life-threatening methicillin-resistant Staphylococcus aureus (MRSA).	According to Dr. Carter, there are particular compounds, like methylglyoxal, in the Manuka honey that cause multi-system failure in the bacteria, killing them before they are able to adapt and build up immunity.	What Manuka honey can do for you Manuka's biological properties range from antioxidant, anti-inflammatory, antibacterial, antiviral, antibiotic and wound healing, to immune-stimulatory.	Manuka honey is marketed for cancer treatment and prevention, high cholesterol, chronic inflammation, diabetes, the treatment of gastrointestinal problems, and eye, ear and sinus infections.	However, it might be most useful in treating skin wounds and leg ulcers.	0	0	0	0	0	0	1	0	0	0	0	0	0	0	0	0	0	0	0	0	1	0	0	0	0	0	0	0	0	0	0	0	0	0	0	0	0	0	0	0
61	snes-01547	Manuka honey, as a topical treatment, is better than all known antibiotics.	false	11	Manuka honey is marketed for cancer treatment and prevention, high cholesterol, chronic inflammation, diabetes, the treatment of gastrointestinal problems, and eye, ear and sinus infections.	What Manuka honey can do for you Manuka's biological properties range from antioxidant, anti-inflammatory, antibacterial, antiviral, antibiotic and wound healing, to immune-stimulatory.	However, what separates Manuka honey from the rest is that its antibacterial powers challenge even the toughest superbugs, such as the life-threatening methicillin-resistant Staphylococcus aureus (MRSA).	However, it might be most useful in treating skin wounds and leg ulcers.	According to one study, published in the scientific journal Peer J, chronic wounds are becoming a major global health problem, due to antibiotic resistance issues.	0	0	0	0	0	0	0	0	0	0	0	0	0	0	0	0	0	0	0	0	0	0	0	0	0	0	0	0	0	0	0	0	0	0	0	0	0	0	0	0
62	snes-01547	Manuka honey, as a topical treatment, is better than all known antibiotics.	false	12	However, it might be most useful in treating skin wounds and leg ulcers.	However, what separates Manuka honey from the rest is that its antibacterial powers challenge even the toughest superbugs, such as the life-threatening methicillin-resistant Staphylococcus aureus (MRSA).	Manuka honey is marketed for cancer treatment and prevention, high cholesterol, chronic inflammation, diabetes, the treatment of gastrointestinal problems, and eye, ear and sinus infections.	According to one study, published in the scientific journal Peer J, chronic wounds are becoming a major global health problem, due to antibiotic resistance issues.	They are costly and difficult to treat, and bacterial biofilms are important contributors to the delay in healing.	0	0	0	0	0	0	0	0	0	0	0	1	0	0	0	0	0	0	0	0	0	0	0	0	0	0	0	0	0	0	0	0	0	0	0	0	0	0	0	0
63	snes-01547	Manuka honey, as a topical treatment, is better than all known antibiotics.	false	13	According to one study, published in the scientific journal Peer J, chronic wounds are becoming a major global health problem, due to antibiotic resistance issues.	Manuka honey is marketed for cancer treatment and prevention, high cholesterol, chronic inflammation, diabetes, the treatment of gastrointestinal problems, and eye, ear and sinus infections.	However, it might be most useful in treating skin wounds and leg ulcers.	They are costly and difficult to treat, and bacterial biofilms are important contributors to the delay in healing.	There is an urgent need for new, effective agents in topical wound care, and honey has shown some great potential in this regard.	0	0	0	0	0	0	0	0	0	0	0	1	0	0	0	0	0	0	0	0	0	0	0	0	0	0	0	0	0	0	0	0	0	0	0	0	0	0	0	0
64	snes-01547	Manuka honey, as a topical treatment, is better than all known antibiotics.	false	14	They are costly and difficult to treat, and bacterial biofilms are important contributors to the delay in healing.	However, it might be most useful in treating skin wounds and leg ulcers.	According to one study, published in the scientific journal Peer J, chronic wounds are becoming a major global health problem, due to antibiotic resistance issues.	There is an urgent need for new, effective agents in topical wound care, and honey has shown some great potential in this regard.	For their study, researchers reviewed Manuka honey in particular as an alternative treatment for wounds because of its broad-spectrum antibacterial activity and the inability of bacteria to develop resistance to it.	0	0	0	0	0	0	0	0	0	0	0	0	0	0	0	0	0	0	0	0	0	0	0	0	0	0	0	0	0	0	0	0	0	0	0	0	0	0	0	0
65	snes-01547	Manuka honey, as a topical treatment, is better than all known antibiotics.	false	15	There is an urgent need for new, effective agents in topical wound care, and honey has shown some great potential in this regard.	According to one study, published in the scientific journal Peer J, chronic wounds are becoming a major global health problem, due to antibiotic resistance issues.	They are costly and difficult to treat, and bacterial biofilms are important contributors to the delay in healing.	For their study, researchers reviewed Manuka honey in particular as an alternative treatment for wounds because of its broad-spectrum antibacterial activity and the inability of bacteria to develop resistance to it.	Their study indicated that honey might prevent bacterial biofilms and eliminate established biofilms.	0	0	0	0	0	0	1	0	0	0	0	0	0	0	0	0	0	0	0	0	1	0	0	0	0	0	0	0	0	0	0	0	0	0	0	0	0	0	0	0
66	snes-01547	Manuka honey, as a topical treatment, is better than all known antibiotics.	false	16	For their study, researchers reviewed Manuka honey in particular as an alternative treatment for wounds because of its broad-spectrum antibacterial activity and the inability of bacteria to develop resistance to it.	They are costly and difficult to treat, and bacterial biofilms are important contributors to the delay in healing.	There is an urgent need for new, effective agents in topical wound care, and honey has shown some great potential in this regard.	Their study indicated that honey might prevent bacterial biofilms and eliminate established biofilms.	Furthermore, they reported that Manuka honey could successfully be used to kill all MSSA and MRSA biofilms in a chronic wound, supporting the use of this type of honey as an effective topical treatment for chronic wound infections.	0	0	0	0	0	0	1	0	0	0	0	0	0	0	0	0	0	0	0	0	1	0	0	0	0	0	0	0	0	0	0	0	0	0	0	0	0	0	0	0
67	snes-01547	Manuka honey, as a topical treatment, is better than all known antibiotics.	false	17	Their study indicated that honey might prevent bacterial biofilms and eliminate established biofilms.	There is an urgent need for new, effective agents in topical wound care, and honey has shown some great potential in this regard.	For their study, researchers reviewed Manuka honey in particular as an alternative treatment for wounds because of its broad-spectrum antibacterial activity and the inability of bacteria to develop resistance to it.	Furthermore, they reported that Manuka honey could successfully be used to kill all MSSA and MRSA biofilms in a chronic wound, supporting the use of this type of honey as an effective topical treatment for chronic wound infections.	In recent years, word of the biological benefits of Manuka honey has spread to every corner of the world, turning it into one of the most popular superfoods out there.	0	0	0	0	0	0	1	0	0	0	0	0	0	0	0	0	0	0	0	0	1	0	0	0	0	0	0	0	0	0	0	0	0	0	0	0	0	0	0	0
68	snes-01547	Manuka honey, as a topical treatment, is better than all known antibiotics.	false	18	Furthermore, they reported that Manuka honey could successfully be used to kill all MSSA and MRSA biofilms in a chronic wound, supporting the use of this type of honey as an effective topical treatment for chronic wound infections.	For their study, researchers reviewed Manuka honey in particular as an alternative treatment for wounds because of its broad-spectrum antibacterial activity and the inability of bacteria to develop resistance to it.	Their study indicated that honey might prevent bacterial biofilms and eliminate established biofilms.	In recent years, word of the biological benefits of Manuka honey has spread to every corner of the world, turning it into one of the most popular superfoods out there.	Its fame and the over-demand, however, have caused shortages, resulting in fake, usually cheaper, products to enter the market.	0	0	0	0	0	0	1	0	0	0	0	0	0	0	0	0	0	0	0	0	1	0	0	0	0	0	0	0	0	0	0	0	0	0	0	0	0	0	0	0
69	snes-01547	Manuka honey, as a topical treatment, is better than all known antibiotics.	false	19	In recent years, word of the biological benefits of Manuka honey has spread to every corner of the world, turning it into one of the most popular superfoods out there.	Their study indicated that honey might prevent bacterial biofilms and eliminate established biofilms.	Furthermore, they reported that Manuka honey could successfully be used to kill all MSSA and MRSA biofilms in a chronic wound, supporting the use of this type of honey as an effective topical treatment for chronic wound infections.	Its fame and the over-demand, however, have caused shortages, resulting in fake, usually cheaper, products to enter the market.	So, if you are going to spend your money on honey to reap its benefits, make sure you are buying the real thing.	0	0	0	0	0	0	0	1	0	0	0	0	0	0	0	0	0	0	0	0	0	0	1	0	0	0	0	0	0	0	0	0	0	0	0	0	0	0	0	0
70	snes-01547	Manuka honey, as a topical treatment, is better than all known antibiotics.	false	20	Its fame and the over-demand, however, have caused shortages, resulting in fake, usually cheaper, products to enter the market.	Furthermore, they reported that Manuka honey could successfully be used to kill all MSSA and MRSA biofilms in a chronic wound, supporting the use of this type of honey as an effective topical treatment for chronic wound infections.	In recent years, word of the biological benefits of Manuka honey has spread to every corner of the world, turning it into one of the most popular superfoods out there.	So, if you are going to spend your money on honey to reap its benefits, make sure you are buying the real thing.		0	0	0	0	0	0	0	0	0	0	0	0	0	0	0	0	0	0	0	0	0	0	0	0	0	0	0	0	0	0	0	0	0	0	0	0	0	0	0	0
71	snes-01547	Manuka honey, as a topical treatment, is better than all known antibiotics.	false	21	So, if you are going to spend your money on honey to reap its benefits, make sure you are buying the real thing.	In recent years, word of the biological benefits of Manuka honey has spread to every corner of the world, turning it into one of the most popular superfoods out there.	Its fame and the over-demand, however, have caused shortages, resulting in fake, usually cheaper, products to enter the market.			0	0	0	0	0	0	0	0	0	0	0	0	0	0	0	0	0	0	0	0	0	0	0	0	0	0	0	0	0	0	0	0	0	0	0	0	0	0	0	0
72	tron-02209	Pray for Cindy Hogman, an adult with cancer	true	0	Example:			[Collected via e-mail, 2002]	My name is Gary "Nick" Hogman, Some of you receiving know me, some do not.	0	0	0	0	0	0	0	0	0	0	0	0	0	0	0	0	0	0	0	0	0	0	0	0	0	0	0	0	0	0	0	0	0	0	0	0	0	0	0	0
73	tron-02209	Pray for Cindy Hogman, an adult with cancer	true	1	[Collected via e-mail, 2002]		Example:	My name is Gary "Nick" Hogman, Some of you receiving know me, some do not.	My wife Cindy is 32 years old and has just been diagnosed 3 days ago with stage 4 cervical cancer and her chances for survival are very slim.	1	0	0	0	0	0	0	0	0	0	0	0	0	1	0	0	0	0	0	0	0	0	0	0	0	0	0	0	0	0	0	0	0	0	0	0	0	0	0	0
74	tron-02209	Pray for Cindy Hogman, an adult with cancer	true	2	My name is Gary "Nick" Hogman, Some of you receiving know me, some do not.	Example:	[Collected via e-mail, 2002]	My wife Cindy is 32 years old and has just been diagnosed 3 days ago with stage 4 cervical cancer and her chances for survival are very slim.	She was pregnant with our second child and had miscarried at 5 months and now we know why.	1	0	0	0	0	0	0	0	0	0	0	0	0	1	0	0	0	0	0	0	0	0	0	0	0	0	0	0	0	0	0	0	0	0	0	0	0	0	0	0
75	tron-02209	Pray for Cindy Hogman, an adult with cancer	true	3	My wife Cindy is 32 years old and has just been diagnosed 3 days ago with stage 4 cervical cancer and her chances for survival are very slim.	[Collected via e-mail, 2002]	My name is Gary "Nick" Hogman, Some of you receiving know me, some do not.	She was pregnant with our second child and had miscarried at 5 months and now we know why.	This is a request for you to forward this email to everyone you know asking for prayer.	1	0	0	0	0	0	0	0	0	0	0	0	0	1	0	0	0	0	0	0	0	0	0	0	0	0	0	0	0	0	0	0	0	0	0	0	0	0	0	0
76	tron-02209	Pray for Cindy Hogman, an adult with cancer	true	4	She was pregnant with our second child and had miscarried at 5 months and now we know why.	My name is Gary "Nick" Hogman, Some of you receiving know me, some do not.	My wife Cindy is 32 years old and has just been diagnosed 3 days ago with stage 4 cervical cancer and her chances for survival are very slim.	This is a request for you to forward this email to everyone you know asking for prayer.	The more people that pray for her to be healed the better.	1	0	0	0	0	0	0	0	0	0	0	1	0	1	0	0	0	0	0	0	0	0	0	0	0	0	0	0	0	0	0	0	0	0	0	0	0	0	0	0
77	tron-02209	Pray for Cindy Hogman, an adult with cancer	true	5	This is a request for you to forward this email to everyone you know asking for prayer.	My wife Cindy is 32 years old and has just been diagnosed 3 days ago with stage 4 cervical cancer and her chances for survival are very slim.	She was pregnant with our second child and had miscarried at 5 months and now we know why.	The more people that pray for her to be healed the better.	Pray and forward.	0	0	0	0	0	0	0	0	0	0	0	1	0	0	0	0	0	0	0	0	0	0	0	0	0	0	0	0	0	0	0	0	0	0	0	0	0	0	0	0
78	tron-02209	Pray for Cindy Hogman, an adult with cancer	true	6	The more people that pray for her to be healed the better.	She was pregnant with our second child and had miscarried at 5 months and now we know why.	This is a request for you to forward this email to everyone you know asking for prayer.	Pray and forward.	It only takes a second to hit forward.	0	0	0	0	0	0	0	0	0	0	0	0	0	0	0	0	0	0	0	0	0	0	0	0	0	0	0	0	0	0	0	0	0	0	0	0	0	0	0	0
79	tron-02209	Pray for Cindy Hogman, an adult with cancer	true	7	Pray and forward.	This is a request for you to forward this email to everyone you know asking for prayer.	The more people that pray for her to be healed the better.	It only takes a second to hit forward.	Please do it and don't delete this, your prayer will save her life.	0	0	0	0	0	0	0	0	0	0	0	1	0	0	0	0	0	0	0	0	0	0	0	0	0	0	0	0	0	0	0	0	0	0	0	0	0	0	0	0
80	tron-02209	Pray for Cindy Hogman, an adult with cancer	true	8	It only takes a second to hit forward.	The more people that pray for her to be healed the better.	Pray and forward.	Please do it and don't delete this, your prayer will save her life.	Please pray and ask everyone you know to pray for the HEALING of Cindy, removal of all cancer in her body so she may enjoy all that life has to offer, and to continue to be the wonderful mother to our 5 year old son Michael.	0	0	0	0	0	0	0	0	0	0	0	0	0	0	0	0	0	0	0	0	0	0	0	0	0	0	0	0	0	0	0	0	0	0	0	0	0	0	0	0
81	tron-02209	Pray for Cindy Hogman, an adult with cancer	true	9	Please do it and don't delete this, your prayer will save her life.	Pray and forward.	It only takes a second to hit forward.	Please pray and ask everyone you know to pray for the HEALING of Cindy, removal of all cancer in her body so she may enjoy all that life has to offer, and to continue to be the wonderful mother to our 5 year old son Michael.	The power of Prayer is unsurpassed.	0	0	0	0	0	0	0	0	0	0	0	0	0	0	0	0	0	0	0	0	0	0	0	0	0	0	0	0	0	0	0	0	0	0	0	0	0	0	0	0
82	tron-02209	Pray for Cindy Hogman, an adult with cancer	true	10	Please pray and ask everyone you know to pray for the HEALING of Cindy, removal of all cancer in her body so she may enjoy all that life has to offer, and to continue to be the wonderful mother to our 5 year old son Michael.	It only takes a second to hit forward.	Please do it and don't delete this, your prayer will save her life.	The power of Prayer is unsurpassed.	I want the whole world to have her in their prayers the next few weeks.	0	0	0	0	0	0	0	0	0	0	1	0	0	0	0	0	0	0	0	0	0	0	0	0	0	0	0	0	0	0	0	0	0	1	0	0	0	0	0	0
83	tron-02209	Pray for Cindy Hogman, an adult with cancer	true	11	The power of Prayer is unsurpassed.	Please do it and don't delete this, your prayer will save her life.	Please pray and ask everyone you know to pray for the HEALING of Cindy, removal of all cancer in her body so she may enjoy all that life has to offer, and to continue to be the wonderful mother to our 5 year old son Michael.	I want the whole world to have her in their prayers the next few weeks.	God will hear our cry.	0	0	0	0	0	0	0	0	0	0	0	0	0	0	0	0	0	0	0	0	0	0	0	0	0	0	0	0	0	0	0	0	0	0	0	0	0	0	0	0
84	tron-02209	Pray for Cindy Hogman, an adult with cancer	true	12	I want the whole world to have her in their prayers the next few weeks.	Please pray and ask everyone you know to pray for the HEALING of Cindy, removal of all cancer in her body so she may enjoy all that life has to offer, and to continue to be the wonderful mother to our 5 year old son Michael.	The power of Prayer is unsurpassed.	God will hear our cry.	Please do not be offended by my plea.	0	0	0	0	0	0	0	0	0	0	0	0	0	0	0	0	0	0	0	0	0	0	0	0	0	0	0	0	0	0	0	0	0	0	0	0	0	0	0	0
85	tron-02209	Pray for Cindy Hogman, an adult with cancer	true	13	God will hear our cry.	The power of Prayer is unsurpassed.	I want the whole world to have her in their prayers the next few weeks.	Please do not be offended by my plea.	This is only a request for your help.	0	0	0	0	0	0	0	0	0	0	0	0	0	0	0	0	0	0	0	0	0	0	0	0	0	0	0	0	0	0	0	0	0	0	0	0	0	0	0	0
86	tron-02209	Pray for Cindy Hogman, an adult with cancer	true	14	Please do not be offended by my plea.	I want the whole world to have her in their prayers the next few weeks.	God will hear our cry.	This is only a request for your help.	Thank you from the bottom of my heart for reading this and helping with our quest for healing, no words can express how much power we have when we do a little extra to come together.	0	0	0	0	0	0	0	0	0	0	0	0	0	0	0	0	0	0	0	0	0	0	0	0	0	0	0	0	0	0	0	0	0	0	0	0	0	0	0	0
87	tron-02209	Pray for Cindy Hogman, an adult with cancer	true	15	This is only a request for your help.	God will hear our cry.	Please do not be offended by my plea.	Thank you from the bottom of my heart for reading this and helping with our quest for healing, no words can express how much power we have when we do a little extra to come together.	Regards, Cindy's in love husband.	0	0	0	0	0	0	0	0	0	0	0	0	0	0	0	0	0	0	0	0	0	0	0	0	0	0	0	0	0	0	0	0	0	0	0	0	0	0	0	0
88	tron-02209	Pray for Cindy Hogman, an adult with cancer	true	16	Thank you from the bottom of my heart for reading this and helping with our quest for healing, no words can express how much power we have when we do a little extra to come together.	Please do not be offended by my plea.	This is only a request for your help.	Regards, Cindy's in love husband.	Gary	0	0	0	0	0	0	0	0	0	0	0	0	0	0	0	0	0	0	0	0	0	0	0	0	0	0	0	0	0	0	0	0	0	0	0	0	0	0	0	0
89	tron-02209	Pray for Cindy Hogman, an adult with cancer	true	17	Regards, Cindy's in love husband.	This is only a request for your help.	Thank you from the bottom of my heart for reading this and helping with our quest for healing, no words can express how much power we have when we do a little extra to come together.	Gary		0	0	0	0	0	0	0	0	0	0	0	0	0	0	0	0	0	0	0	0	0	0	0	0	0	0	0	0	0	0	0	0	0	0	0	0	0	0	0	0
90	tron-02209	Pray for Cindy Hogman, an adult with cancer	true	18	Gary	Thank you from the bottom of my heart for reading this and helping with our quest for healing, no words can express how much power we have when we do a little extra to come together.	Regards, Cindy's in love husband.			0	0	0	0	0	0	0	0	0	0	0	0	0	0	0	0	0	0	0	0	0	0	0	0	0	0	0	0	0	0	0	0	0	0	0	0	0	0	0	0
91	tron-02223	Rand Paul’s Summer Break Eye Surgeries	true	0	Rand Paul's Summer Break Eye Surgeries Source: https://www.washingtonpost.com/news/post-politics/wp/2015/08/14/rand-paul-leaves-the-campaign-trail-for-eye-surgeries-in-haiti/ Fact checking: https://www.truthorfiction.com/rand-paul-summer-break-101713/ Actual content: Rand Paul leaves the campaign trail for eye surgeries in Haiti This weekend, while the political world descends on Iowa's state fai…			As he's done every summer recess since joining the Senate, Paul's performing pro bono eye surgery.	This year's mission, run and sponsored by the Moran Eye Center from the University of Utah, will take Paul to Haiti, the poorest nation in the Western Hemisphere.	0	0	0	0	0	0	0	0	0	0	0	0	0	0	0	0	0	0	0	0	0	0	0	0	0	0	0	0	0	0	0	0	0	0	0	0	0	0	0	0
92	tron-02223	Rand Paul’s Summer Break Eye Surgeries	true	1	As he's done every summer recess since joining the Senate, Paul's performing pro bono eye surgery.		Rand Paul's Summer Break Eye Surgeries Source: https://www.washingtonpost.com/news/post-politics/wp/2015/08/14/rand-paul-leaves-the-campaign-trail-for-eye-surgeries-in-haiti/ Fact checking: https://www.truthorfiction.com/rand-paul-summer-break-101713/ Actual content: Rand Paul leaves the campaign trail for eye surgeries in Haiti This weekend, while the political world descends on Iowa's state fai…	This year's mission, run and sponsored by the Moran Eye Center from the University of Utah, will take Paul to Haiti, the poorest nation in the Western Hemisphere.	"We kind of suggested it," said Paul in an interview.	0	0	0	0	0	0	0	0	0	0	0	0	0	0	0	0	0	0	0	0	0	0	0	0	0	0	0	0	0	0	0	0	0	0	0	0	0	0	0	0
93	tron-02223	Rand Paul’s Summer Break Eye Surgeries	true	2	This year's mission, run and sponsored by the Moran Eye Center from the University of Utah, will take Paul to Haiti, the poorest nation in the Western Hemisphere.	Rand Paul's Summer Break Eye Surgeries Source: https://www.washingtonpost.com/news/post-politics/wp/2015/08/14/rand-paul-leaves-the-campaign-trail-for-eye-surgeries-in-haiti/ Fact checking: https://www.truthorfiction.com/rand-paul-summer-break-101713/ Actual content: Rand Paul leaves the campaign trail for eye surgeries in Haiti This weekend, while the political world descends on Iowa's state fai…	As he's done every summer recess since joining the Senate, Paul's performing pro bono eye surgery.	"We kind of suggested it," said Paul in an interview.	"There was talk about Haiti being in great need, and it's fairly close to the United States.	0	0	0	0	0	0	0	0	0	0	0	0	0	0	0	0	0	0	0	0	0	0	0	0	0	0	0	0	0	0	0	0	0	0	0	0	0	0	0	0
94	tron-02223	Rand Paul’s Summer Break Eye Surgeries	true	3	"We kind of suggested it," said Paul in an interview.	As he's done every summer recess since joining the Senate, Paul's performing pro bono eye surgery.	This year's mission, run and sponsored by the Moran Eye Center from the University of Utah, will take Paul to Haiti, the poorest nation in the Western Hemisphere.	"There was talk about Haiti being in great need, and it's fairly close to the United States.	Haiti, unfortunately, is famous for a long history of problems.	0	0	0	0	0	0	0	0	0	0	0	0	0	0	0	0	0	0	0	0	0	0	0	0	0	0	0	0	0	0	0	0	0	0	0	0	0	0	0	0
95	tron-02223	Rand Paul’s Summer Break Eye Surgeries	true	4	"There was talk about Haiti being in great need, and it's fairly close to the United States.	This year's mission, run and sponsored by the Moran Eye Center from the University of Utah, will take Paul to Haiti, the poorest nation in the Western Hemisphere.	"We kind of suggested it," said Paul in an interview.	Haiti, unfortunately, is famous for a long history of problems.	" In 2014, Paul joined the Moran center on a similar trip to Guatemala, where he reunited with old patients and broke out his rusty, Texas-tutored Spanish.	0	0	0	0	0	0	0	0	0	0	0	0	0	0	0	0	0	0	0	0	0	0	0	0	0	0	0	0	0	0	0	0	0	0	0	0	0	0	0	0
96	tron-02223	Rand Paul’s Summer Break Eye Surgeries	true	5	Haiti, unfortunately, is famous for a long history of problems.	"We kind of suggested it," said Paul in an interview.	"There was talk about Haiti being in great need, and it's fairly close to the United States.	" In 2014, Paul joined the Moran center on a similar trip to Guatemala, where he reunited with old patients and broke out his rusty, Texas-tutored Spanish.	He has no similar connection to Haiti.	0	0	0	0	0	0	0	0	0	0	0	0	0	0	0	0	0	0	0	0	0	0	0	0	0	0	0	0	0	0	0	0	0	0	0	0	0	0	0	0
97	tron-02223	Rand Paul’s Summer Break Eye Surgeries	true	6	" In 2014, Paul joined the Moran center on a similar trip to Guatemala, where he reunited with old patients and broke out his rusty, Texas-tutored Spanish.	"There was talk about Haiti being in great need, and it's fairly close to the United States.	Haiti, unfortunately, is famous for a long history of problems.	He has no similar connection to Haiti.	[video]	0	0	0	0	0	0	0	0	0	0	0	0	0	0	0	0	0	0	0	0	0	0	0	0	0	0	0	0	0	0	0	0	0	0	0	0	0	0	0	0
98	tron-02223	Rand Paul’s Summer Break Eye Surgeries	true	7	He has no similar connection to Haiti.	Haiti, unfortunately, is famous for a long history of problems.	" In 2014, Paul joined the Moran center on a similar trip to Guatemala, where he reunited with old patients and broke out his rusty, Texas-tutored Spanish.	[video]	This August 2014 video shows Sen. Rand Paul (R-Ky.) in Guatemala on a medical mission trip.	0	0	0	0	0	0	0	0	0	0	0	0	0	0	0	0	0	0	0	0	0	0	0	0	0	0	0	0	0	0	0	0	0	0	0	0	0	0	0	0
99	tron-02223	Rand Paul’s Summer Break Eye Surgeries	true	8	[video]	" In 2014, Paul joined the Moran center on a similar trip to Guatemala, where he reunited with old patients and broke out his rusty, Texas-tutored Spanish.	He has no similar connection to Haiti.	This August 2014 video shows Sen. Rand Paul (R-Ky.) in Guatemala on a medical mission trip.	Paul, a licensed ophthalmologist, checks the eyes of a patient and converses him via an interpreter.	0	0	0	0	0	0	0	0	0	0	0	0	0	0	0	0	0	0	0	0	0	0	0	0	0	0	0	0	0	0	0	0	0	0	0	0	0	0	0	0
100	tron-02223	Rand Paul’s Summer Break Eye Surgeries	true	9	This August 2014 video shows Sen. Rand Paul (R-Ky.) in Guatemala on a medical mission trip.	He has no similar connection to Haiti.	[video]	Paul, a licensed ophthalmologist, checks the eyes of a patient and converses him via an interpreter.	(Video: Ed O'Keefe/The Washington Post) "You want to go where the need is greatest," Paul said.	0	0	0	0	0	0	0	0	0	0	0	0	0	0	0	0	0	0	0	0	0	0	0	0	0	0	0	0	0	0	0	0	0	0	0	0	0	0	0	0
101	tron-02223	Rand Paul’s Summer Break Eye Surgeries	true	10	Paul, a licensed ophthalmologist, checks the eyes of a patient and converses him via an interpreter.	[video]	This August 2014 video shows Sen. Rand Paul (R-Ky.) in Guatemala on a medical mission trip.	(Video: Ed O'Keefe/The Washington Post) "You want to go where the need is greatest," Paul said.	"In our country, when you have cataracts, they're relatively easy to fix.	0	0	0	0	0	0	0	0	0	0	0	0	0	0	0	0	0	0	0	0	0	0	0	0	0	0	0	0	0	0	0	0	0	0	0	0	0	0	0	0
102	tron-02223	Rand Paul’s Summer Break Eye Surgeries	true	11	(Video: Ed O'Keefe/The Washington Post) "You want to go where the need is greatest," Paul said.	This August 2014 video shows Sen. Rand Paul (R-Ky.) in Guatemala on a medical mission trip.	Paul, a licensed ophthalmologist, checks the eyes of a patient and converses him via an interpreter.	"In our country, when you have cataracts, they're relatively easy to fix.	The people we will treat in Haiti -- many of them will be completely blind.	0	0	0	0	0	0	0	0	0	0	0	0	0	0	0	0	0	0	0	0	0	0	0	0	0	0	0	0	0	0	0	0	0	0	0	0	0	0	0	0
103	tron-02223	Rand Paul’s Summer Break Eye Surgeries	true	12	"In our country, when you have cataracts, they're relatively easy to fix.	Paul, a licensed ophthalmologist, checks the eyes of a patient and converses him via an interpreter.	(Video: Ed O'Keefe/The Washington Post) "You want to go where the need is greatest," Paul said.	The people we will treat in Haiti -- many of them will be completely blind.	There's less medical access there.	0	0	0	0	0	0	0	0	0	0	0	0	0	0	0	0	0	0	0	0	0	0	0	0	0	0	0	0	0	0	0	0	0	0	0	0	0	0	0	0
104	tron-02223	Rand Paul’s Summer Break Eye Surgeries	true	13	The people we will treat in Haiti -- many of them will be completely blind.	(Video: Ed O'Keefe/The Washington Post) "You want to go where the need is greatest," Paul said.	"In our country, when you have cataracts, they're relatively easy to fix.	There's less medical access there.	It's closer to the equator.	0	0	0	0	0	0	0	0	0	0	0	0	0	0	0	0	0	0	0	0	0	0	0	0	0	0	0	0	0	0	0	0	0	0	0	0	0	0	0	0
105	tron-02223	Rand Paul’s Summer Break Eye Surgeries	true	14	There's less medical access there.	"In our country, when you have cataracts, they're relatively easy to fix.	The people we will treat in Haiti -- many of them will be completely blind.	It's closer to the equator.	There's more sun, people are outside more, fewer people even have sunglasses.	0	0	0	0	0	0	0	0	0	0	0	0	0	0	0	0	0	0	0	0	0	0	0	0	0	0	0	0	0	0	0	0	0	0	0	0	0	0	0	0
106	tron-02223	Rand Paul’s Summer Break Eye Surgeries	true	15	It's closer to the equator.	The people we will treat in Haiti -- many of them will be completely blind.	There's less medical access there.	There's more sun, people are outside more, fewer people even have sunglasses.	So there's a lot you can do.	0	0	0	0	0	0	0	0	0	0	0	0	0	0	0	0	0	0	0	0	0	0	0	0	0	0	0	0	0	0	0	0	0	0	0	0	0	0	0	0
107	tron-02223	Rand Paul’s Summer Break Eye Surgeries	true	16	There's more sun, people are outside more, fewer people even have sunglasses.	There's less medical access there.	It's closer to the equator.	So there's a lot you can do.	" Paul's 2014 trip was balanced against a small media frenzy.	0	0	0	0	0	0	0	0	0	0	0	0	0	0	0	0	0	0	0	0	0	0	0	0	0	0	0	0	0	0	0	0	0	0	0	0	0	0	0	0
108	tron-02223	Rand Paul’s Summer Break Eye Surgeries	true	17	So there's a lot you can do.	It's closer to the equator.	There's more sun, people are outside more, fewer people even have sunglasses.	" Paul's 2014 trip was balanced against a small media frenzy.	Multiple media outlets traveled with him, filming his journey and surgeries for profiles of a likely presidential contender.	0	0	0	0	0	0	0	0	0	0	0	0	0	0	0	0	0	0	0	0	0	0	0	0	0	0	0	0	0	0	0	0	0	0	0	0	0	0	0	0
109	tron-02223	Rand Paul’s Summer Break Eye Surgeries	true	18	" Paul's 2014 trip was balanced against a small media frenzy.	There's more sun, people are outside more, fewer people even have sunglasses.	So there's a lot you can do.	Multiple media outlets traveled with him, filming his journey and surgeries for profiles of a likely presidential contender.	David Bossie of the conservative Citizens United even brought a film crew -- complete with aerial drone -- to capture the scene.	0	0	0	0	0	0	0	0	0	0	0	0	0	0	0	0	0	0	0	0	0	0	0	0	0	0	0	0	0	0	0	0	0	0	0	0	0	0	0	0
110	tron-02223	Rand Paul’s Summer Break Eye Surgeries	true	19	Multiple media outlets traveled with him, filming his journey and surgeries for profiles of a likely presidential contender.	So there's a lot you can do.	" Paul's 2014 trip was balanced against a small media frenzy.	David Bossie of the conservative Citizens United even brought a film crew -- complete with aerial drone -- to capture the scene.	Citizens United has not yet made use of that footage, and the entourage will be smaller in Haiti.	0	0	0	0	0	0	0	0	0	0	0	0	0	0	0	0	0	0	0	0	0	0	0	0	0	0	0	0	0	0	0	0	0	0	0	0	0	0	0	0
111	tron-02223	Rand Paul’s Summer Break Eye Surgeries	true	20	David Bossie of the conservative Citizens United even brought a film crew -- complete with aerial drone -- to capture the scene.	" Paul's 2014 trip was balanced against a small media frenzy.	Multiple media outlets traveled with him, filming his journey and surgeries for profiles of a likely presidential contender.	Citizens United has not yet made use of that footage, and the entourage will be smaller in Haiti.	(The Washington Post will be part of it.)	0	0	0	0	0	0	0	0	0	0	0	0	0	0	0	0	0	0	0	0	0	0	0	0	0	0	0	0	0	0	0	0	0	0	0	0	0	0	0	0
112	tron-02223	Rand Paul’s Summer Break Eye Surgeries	true	21	Citizens United has not yet made use of that footage, and the entourage will be smaller in Haiti.	Multiple media outlets traveled with him, filming his journey and surgeries for profiles of a likely presidential contender.	David Bossie of the conservative Citizens United even brought a film crew -- complete with aerial drone -- to capture the scene.	(The Washington Post will be part of it.)	"The main thing is for me personally is that it's one of the most incredible things I get to be involved with," said.	0	0	0	0	0	0	0	0	0	0	0	0	0	0	0	0	0	0	0	0	0	0	0	0	0	0	0	0	0	0	0	0	0	0	0	0	0	0	0	0
113	tron-02223	Rand Paul’s Summer Break Eye Surgeries	true	22	(The Washington Post will be part of it.)	David Bossie of the conservative Citizens United even brought a film crew -- complete with aerial drone -- to capture the scene.	Citizens United has not yet made use of that footage, and the entourage will be smaller in Haiti.	"The main thing is for me personally is that it's one of the most incredible things I get to be involved with," said.	"It's still the most important thing I get to do, even while I'm in the Senate, even running for president.	0	0	0	0	0	0	0	0	0	0	0	0	0	0	0	0	0	0	0	0	0	0	0	0	0	0	0	0	0	0	0	0	0	0	0	0	0	0	0	0
114	tron-02223	Rand Paul’s Summer Break Eye Surgeries	true	23	"The main thing is for me personally is that it's one of the most incredible things I get to be involved with," said.	Citizens United has not yet made use of that footage, and the entourage will be smaller in Haiti.	(The Washington Post will be part of it.)	"It's still the most important thing I get to do, even while I'm in the Senate, even running for president.	Two hundred people will be better because we are going to be down there.	0	0	0	0	0	0	0	0	0	0	0	0	0	0	0	0	0	0	0	0	0	0	0	0	0	0	0	0	0	0	0	0	0	0	0	0	0	0	0	0
115	tron-02223	Rand Paul’s Summer Break Eye Surgeries	true	24	"It's still the most important thing I get to do, even while I'm in the Senate, even running for president.	(The Washington Post will be part of it.)	"The main thing is for me personally is that it's one of the most incredible things I get to be involved with," said.	Two hundred people will be better because we are going to be down there.	Local surgeons will get some training, and they'll use that training.	0	0	0	0	0	0	0	0	0	0	0	0	0	0	0	0	0	0	0	0	0	0	0	0	0	0	0	0	0	0	0	0	0	0	0	0	0	0	0	0
116	tron-02223	Rand Paul’s Summer Break Eye Surgeries	true	25	Two hundred people will be better because we are going to be down there.	"The main thing is for me personally is that it's one of the most incredible things I get to be involved with," said.	"It's still the most important thing I get to do, even while I'm in the Senate, even running for president.	Local surgeons will get some training, and they'll use that training.	The goal is not for Americans to keep coming down and doing it, but for Haitians to do more of it themselves.	0	0	0	0	0	0	0	0	0	0	0	0	0	0	0	0	0	0	0	0	0	0	0	0	0	0	0	0	0	0	0	0	0	0	0	0	0	0	0	0
117	tron-02223	Rand Paul’s Summer Break Eye Surgeries	true	26	Local surgeons will get some training, and they'll use that training.	"It's still the most important thing I get to do, even while I'm in the Senate, even running for president.	Two hundred people will be better because we are going to be down there.	The goal is not for Americans to keep coming down and doing it, but for Haitians to do more of it themselves.	" Paul was staying clear of politics, but he was making a point that jibed with his own views of foreign aid.	0	0	0	0	0	0	0	0	0	0	0	0	0	0	0	0	0	0	0	0	0	0	0	0	0	0	0	0	0	0	0	0	0	0	0	0	0	0	0	0
118	tron-02223	Rand Paul’s Summer Break Eye Surgeries	true	27	The goal is not for Americans to keep coming down and doing it, but for Haitians to do more of it themselves.	Two hundred people will be better because we are going to be down there.	Local surgeons will get some training, and they'll use that training.	" Paul was staying clear of politics, but he was making a point that jibed with his own views of foreign aid.	Training people, then trusting them to build their own lives, was always better than constant intervention.	0	0	0	1	0	0	0	0	0	0	0	0	0	0	0	0	0	0	0	0	0	0	0	0	0	0	0	0	0	0	0	0	0	0	0	0	0	0	0	0
119	tron-02223	Rand Paul’s Summer Break Eye Surgeries	true	28	" Paul was staying clear of politics, but he was making a point that jibed with his own views of foreign aid.	Local surgeons will get some training, and they'll use that training.	The goal is not for Americans to keep coming down and doing it, but for Haitians to do more of it themselves.	Training people, then trusting them to build their own lives, was always better than constant intervention.	Paul cited the example of Sanduk Ruit, a Nepalese doctor who designed a simplified kind of cataract surgery, because he had to work "without sophisticated equipment" -- and in the process, did something a Western doctor would never have thought to do.	0	0	0	1	0	0	0	0	0	0	0	0	0	0	0	0	0	0	0	0	0	0	0	0	0	0	0	0	0	0	0	0	0	0	0	0	0	0	0	0
120	tron-02223	Rand Paul’s Summer Break Eye Surgeries	true	29	Training people, then trusting them to build their own lives, was always better than constant intervention.	The goal is not for Americans to keep coming down and doing it, but for Haitians to do more of it themselves.	" Paul was staying clear of politics, but he was making a point that jibed with his own views of foreign aid.	Paul cited the example of Sanduk Ruit, a Nepalese doctor who designed a simplified kind of cataract surgery, because he had to work "without sophisticated equipment" -- and in the process, did something a Western doctor would never have thought to do.	"In medicine, you're transferring skills," said Paul.	0	0	0	0	0	0	0	0	0	0	0	0	0	0	0	0	0	0	0	0	0	0	0	0	0	0	0	0	0	0	0	0	0	0	0	0	0	0	0	0
121	tron-02223	Rand Paul’s Summer Break Eye Surgeries	true	30	Paul cited the example of Sanduk Ruit, a Nepalese doctor who designed a simplified kind of cataract surgery, because he had to work "without sophisticated equipment" -- and in the process, did something a Western doctor would never have thought to do.	" Paul was staying clear of politics, but he was making a point that jibed with his own views of foreign aid.	Training people, then trusting them to build their own lives, was always better than constant intervention.	"In medicine, you're transferring skills," said Paul.	"Even when you train, you're learning skills.	0	0	0	0	0	0	0	0	0	0	0	0	0	0	0	0	0	0	0	0	0	0	0	0	0	0	0	0	0	0	0	0	0	0	0	0	0	0	0	0
122	tron-02223	Rand Paul’s Summer Break Eye Surgeries	true	31	"In medicine, you're transferring skills," said Paul.	Training people, then trusting them to build their own lives, was always better than constant intervention.	Paul cited the example of Sanduk Ruit, a Nepalese doctor who designed a simplified kind of cataract surgery, because he had to work "without sophisticated equipment" -- and in the process, did something a Western doctor would never have thought to do.	"Even when you train, you're learning skills.	I will continue doing this throughout my life, and at some point I can foresee getting back into medicine full time.	0	0	0	0	0	0	0	0	0	0	0	0	0	0	0	0	0	0	0	0	0	0	0	0	0	0	0	0	0	0	0	0	0	0	0	0	0	0	0	0
123	tron-02223	Rand Paul’s Summer Break Eye Surgeries	true	32	"Even when you train, you're learning skills.	Paul cited the example of Sanduk Ruit, a Nepalese doctor who designed a simplified kind of cataract surgery, because he had to work "without sophisticated equipment" -- and in the process, did something a Western doctor would never have thought to do.	"In medicine, you're transferring skills," said Paul.	I will continue doing this throughout my life, and at some point I can foresee getting back into medicine full time.	It's nice to get away from politics, and do something were you and act there's an immediate result.	0	0	0	0	0	0	0	0	0	0	0	0	0	0	0	0	0	0	0	0	0	0	0	0	0	0	0	0	0	0	0	0	0	0	0	0	0	0	0	0
124	tron-02223	Rand Paul’s Summer Break Eye Surgeries	true	33	I will continue doing this throughout my life, and at some point I can foresee getting back into medicine full time.	"In medicine, you're transferring skills," said Paul.	"Even when you train, you're learning skills.	It's nice to get away from politics, and do something were you and act there's an immediate result.	You take the bandages off, and someone can see.	0	0	0	0	0	0	0	0	0	0	0	0	0	0	0	0	0	0	0	0	0	0	0	0	0	0	0	0	0	0	0	0	0	0	0	0	0	0	0	0
125	tron-02223	Rand Paul’s Summer Break Eye Surgeries	true	34	It's nice to get away from politics, and do something were you and act there's an immediate result.	"Even when you train, you're learning skills.	I will continue doing this throughout my life, and at some point I can foresee getting back into medicine full time.	You take the bandages off, and someone can see.	"	0	0	0	0	0	0	0	0	0	0	0	0	0	0	0	0	0	0	0	0	0	0	0	0	0	0	0	0	0	0	0	0	0	0	0	0	0	0	0	0
126	tron-02223	Rand Paul’s Summer Break Eye Surgeries	true	35	You take the bandages off, and someone can see.	I will continue doing this throughout my life, and at some point I can foresee getting back into medicine full time.	It's nice to get away from politics, and do something were you and act there's an immediate result.	"		0	0	0	0	0	0	0	0	0	0	0	0	0	0	0	0	0	0	0	0	0	0	0	0	0	0	0	0	0	0	0	0	0	0	0	0	0	0	0	0
127	tron-02223	Rand Paul’s Summer Break Eye Surgeries	true	36	"	It's nice to get away from politics, and do something were you and act there's an immediate result.	You take the bandages off, and someone can see.			0	0	0	0	0	0	0	0	0	0	0	0	0	0	0	0	0	0	0	0	0	0	0	0	0	0	0	0	0	0	0	0	0	0	0	0	0	0	0	0
128	snes-02749	Do “Naked” Juices and Smoothies Contain Formaldehyde?	false	0	Facebook Post: Friends don't let friends drink formaldehyde.			PepsiCo (the parent brand of Naked drinks) settled a 9 million dollar lawsuit because they claimed their Naked drinks were all-natural.	They actually were found to have a bunch of nasty chemicals in them including formaldehyde (keeps your dead body preserved-	0	0	0	0	0	0	1	0	0	0	0	1	0	0	0	0	0	0	0	0	1	0	0	0	0	0	0	0	0	0	0	0	0	0	0	0	0	0	0	0
129	snes-02749	Do “Naked” Juices and Smoothies Contain Formaldehyde?	false	1	PepsiCo (the parent brand of Naked drinks) settled a 9 million dollar lawsuit because they claimed their Naked drinks were all-natural.		Facebook Post: Friends don't let friends drink formaldehyde.	They actually were found to have a bunch of nasty chemicals in them including formaldehyde (keeps your dead body preserved-	no thanks), Fibersol-2 ("a soluble corn fiber that acts as a low-calorie bulking agent"), fructooligosaccharides (an alternative sweetener), other artificial ingredients, such as calcium pantothenate (synthetically produced from formaldehyde), and genetically-modified soy.	0	0	0	0	0	0	1	0	0	0	0	0	0	0	0	0	0	0	0	0	1	0	0	0	0	0	0	0	0	0	0	0	0	0	0	0	0	0	0	0
130	snes-02749	Do “Naked” Juices and Smoothies Contain Formaldehyde?	false	2	They actually were found to have a bunch of nasty chemicals in them including formaldehyde (keeps your dead body preserved-	Facebook Post: Friends don't let friends drink formaldehyde.	PepsiCo (the parent brand of Naked drinks) settled a 9 million dollar lawsuit because they claimed their Naked drinks were all-natural.	no thanks), Fibersol-2 ("a soluble corn fiber that acts as a low-calorie bulking agent"), fructooligosaccharides (an alternative sweetener), other artificial ingredients, such as calcium pantothenate (synthetically produced from formaldehyde), and genetically-modified soy.	They never recalled the drinks off the shelves.	0	0	0	0	0	0	0	0	0	0	0	1	0	0	0	0	0	0	0	0	0	0	0	0	0	0	0	0	0	0	0	0	0	0	0	0	0	0	0	0
131	snes-02749	Do “Naked” Juices and Smoothies Contain Formaldehyde?	false	3	no thanks), Fibersol-2 ("a soluble corn fiber that acts as a low-calorie bulking agent"), fructooligosaccharides (an alternative sweetener), other artificial ingredients, such as calcium pantothenate (synthetically produced from formaldehyde), and genetically-modified soy.	PepsiCo (the parent brand of Naked drinks) settled a 9 million dollar lawsuit because they claimed their Naked drinks were all-natural.	They actually were found to have a bunch of nasty chemicals in them including formaldehyde (keeps your dead body preserved-	They never recalled the drinks off the shelves.	They never reformulated.	0	0	0	0	0	0	0	0	0	0	0	1	0	0	0	0	0	0	0	0	0	0	0	0	0	0	0	0	0	0	0	0	0	0	0	0	0	0	0	0
132	snes-02749	Do “Naked” Juices and Smoothies Contain Formaldehyde?	false	4	They never recalled the drinks off the shelves.	They actually were found to have a bunch of nasty chemicals in them including formaldehyde (keeps your dead body preserved-	no thanks), Fibersol-2 ("a soluble corn fiber that acts as a low-calorie bulking agent"), fructooligosaccharides (an alternative sweetener), other artificial ingredients, such as calcium pantothenate (synthetically produced from formaldehyde), and genetically-modified soy.	They never reformulated.	Wanna know what they did in compliance with the lawsuit?	0	0	0	0	0	0	0	0	0	0	0	0	0	0	0	0	0	0	0	0	0	0	0	0	0	0	0	0	0	0	0	0	0	0	0	0	0	0	0	0
133	snes-02749	Do “Naked” Juices and Smoothies Contain Formaldehyde?	false	5	They never reformulated.	no thanks), Fibersol-2 ("a soluble corn fiber that acts as a low-calorie bulking agent"), fructooligosaccharides (an alternative sweetener), other artificial ingredients, such as calcium pantothenate (synthetically produced from formaldehyde), and genetically-modified soy.	They never recalled the drinks off the shelves.	Wanna know what they did in compliance with the lawsuit?	They had to remove the word "NATURAL" from the label.	0	0	0	0	0	0	0	0	0	0	0	0	0	0	0	0	0	0	0	0	0	0	0	0	0	0	0	0	0	0	0	0	0	0	0	0	0	0	0	0
134	snes-02749	Do “Naked” Juices and Smoothies Contain Formaldehyde?	false	6	Wanna know what they did in compliance with the lawsuit?	They never recalled the drinks off the shelves.	They never reformulated.	They had to remove the word "NATURAL" from the label.	It's still the same toxic concoction I was forcing my kids to drink because I believed they were good for us.	0	0	0	0	0	0	0	0	0	0	0	1	0	0	0	0	0	0	0	0	0	0	0	0	0	0	0	0	0	0	0	0	0	0	0	0	0	0	0	1
135	snes-02749	Do “Naked” Juices and Smoothies Contain Formaldehyde?	false	7	They had to remove the word "NATURAL" from the label.	They never reformulated.	Wanna know what they did in compliance with the lawsuit?	It's still the same toxic concoction I was forcing my kids to drink because I believed they were good for us.	Please dump this nasty junk down the drain if you have it in your house.	0	0	0	0	0	0	0	0	0	0	0	0	0	0	0	0	0	0	0	0	0	0	0	0	0	0	0	0	0	0	0	0	0	0	0	0	0	0	0	0
136	snes-02749	Do “Naked” Juices and Smoothies Contain Formaldehyde?	false	8	It's still the same toxic concoction I was forcing my kids to drink because I believed they were good for us.	Wanna know what they did in compliance with the lawsuit?	They had to remove the word "NATURAL" from the label.	Please dump this nasty junk down the drain if you have it in your house.	Don't buy the harmful chemicals these companies hide in their "natural drinks".	0	0	0	0	0	0	0	0	0	0	0	0	0	0	0	0	0	0	0	0	0	0	0	0	0	0	0	0	0	0	0	0	0	0	0	0	0	0	0	0
137	snes-02749	Do “Naked” Juices and Smoothies Contain Formaldehyde?	false	9	Please dump this nasty junk down the drain if you have it in your house.	They had to remove the word "NATURAL" from the label.	It's still the same toxic concoction I was forcing my kids to drink because I believed they were good for us.	Don't buy the harmful chemicals these companies hide in their "natural drinks".	Tag your friends who drink Naked brand drinks.	0	0	0	0	0	0	0	0	0	0	0	0	0	0	0	0	0	0	0	0	0	0	0	0	0	0	0	0	0	0	0	0	0	0	0	0	0	0	0	0
138	snes-02749	Do “Naked” Juices and Smoothies Contain Formaldehyde?	false	10	Don't buy the harmful chemicals these companies hide in their "natural drinks".	It's still the same toxic concoction I was forcing my kids to drink because I believed they were good for us.	Please dump this nasty junk down the drain if you have it in your house.	Tag your friends who drink Naked brand drinks.	I bet they don't know how harmful they are !!	0	0	0	0	0	0	0	0	0	0	0	0	0	0	0	0	0	0	0	0	0	0	0	0	0	0	0	0	0	0	0	0	0	0	0	0	0	0	0	0
139	snes-02749	Do “Naked” Juices and Smoothies Contain Formaldehyde?	false	11	Tag your friends who drink Naked brand drinks.	Please dump this nasty junk down the drain if you have it in your house.	Don't buy the harmful chemicals these companies hide in their "natural drinks".	I bet they don't know how harmful they are !!		0	0	0	0	0	0	0	0	0	0	0	1	0	0	0	0	0	0	0	0	0	0	0	0	0	0	0	0	0	0	0	0	0	0	0	0	0	0	0	0
140	snes-02749	Do “Naked” Juices and Smoothies Contain Formaldehyde?	false	12	I bet they don't know how harmful they are !!	Don't buy the harmful chemicals these companies hide in their "natural drinks".	Tag your friends who drink Naked brand drinks.			0	0	0	0	0	0	0	0	0	0	0	0	0	0	0	0	0	0	0	0	0	0	0	0	0	0	0	0	0	0	0	0	0	0	0	0	0	0	0	0
141	tron-02200	FDA Confirms DTaP Vaccine Causes Autism in November 2017	false	0	Did FDA really announce that vaccines are causing autism?			Did a vaccine manufacturer admits on its package insert that their vaccination can cause autism as one of many adverse reactions?	According to the FDA's online Biologics Blood Vaccines document, a vaccine manufacturer admits on its package insert that their vaccination can cause autism as one of many adverse reactions.	0	0	0	0	0	0	0	0	0	0	1	1	0	0	0	0	0	0	0	0	0	0	0	0	0	0	0	0	0	0	0	0	0	0	0	1	0	0	0	1
142	tron-02200	FDA Confirms DTaP Vaccine Causes Autism in November 2017	false	1	Did a vaccine manufacturer admits on its package insert that their vaccination can cause autism as one of many adverse reactions?		Did FDA really announce that vaccines are causing autism?	According to the FDA's online Biologics Blood Vaccines document, a vaccine manufacturer admits on its package insert that their vaccination can cause autism as one of many adverse reactions.	These adverse events reported during post-approval use of Tripedia vaccine include idiopathic thrombocytopenic purpura, SIDS, anaphylactic reaction, cellulitis, autism, convulsion/grand mal convulsion, encephalopathy, hypotonia, neuropathy, somnolence and apnea.	0	0	0	0	0	0	0	0	0	0	0	1	0	0	0	0	0	0	0	0	0	0	0	0	0	0	0	0	0	0	0	0	0	0	0	0	0	0	0	1
143	tron-02200	FDA Confirms DTaP Vaccine Causes Autism in November 2017	false	2	According to the FDA's online Biologics Blood Vaccines document, a vaccine manufacturer admits on its package insert that their vaccination can cause autism as one of many adverse reactions.	Did FDA really announce that vaccines are causing autism?	Did a vaccine manufacturer admits on its package insert that their vaccination can cause autism as one of many adverse reactions?	These adverse events reported during post-approval use of Tripedia vaccine include idiopathic thrombocytopenic purpura, SIDS, anaphylactic reaction, cellulitis, autism, convulsion/grand mal convulsion, encephalopathy, hypotonia, neuropathy, somnolence and apnea.	Events were included in this list because of the seriousness or frequency of reporting.	0	0	0	0	1	0	1	0	0	0	0	1	0	0	0	0	0	0	0	0	1	0	0	0	0	0	0	0	0	0	0	0	0	0	0	0	0	0	1	0
144	tron-02200	FDA Confirms DTaP Vaccine Causes Autism in November 2017	false	3	These adverse events reported during post-approval use of Tripedia vaccine include idiopathic thrombocytopenic purpura, SIDS, anaphylactic reaction, cellulitis, autism, convulsion/grand mal convulsion, encephalopathy, hypotonia, neuropathy, somnolence and apnea.	Did a vaccine manufacturer admits on its package insert that their vaccination can cause autism as one of many adverse reactions?	According to the FDA's online Biologics Blood Vaccines document, a vaccine manufacturer admits on its package insert that their vaccination can cause autism as one of many adverse reactions.	Events were included in this list because of the seriousness or frequency of reporting.	Because these events are reported voluntarily from a population of uncertain size, it is not always possible to reliably estimate their frequencies or to establish a causal relationship to components of Tripedia vaccine.	0	0	0	0	1	0	0	0	0	0	0	0	0	0	0	0	0	0	0	0	0	0	0	0	0	0	0	0	0	0	0	0	0	0	0	0	0	0	0	0
145	tron-02200	FDA Confirms DTaP Vaccine Causes Autism in November 2017	false	4	Events were included in this list because of the seriousness or frequency of reporting.	According to the FDA's online Biologics Blood Vaccines document, a vaccine manufacturer admits on its package insert that their vaccination can cause autism as one of many adverse reactions.	These adverse events reported during post-approval use of Tripedia vaccine include idiopathic thrombocytopenic purpura, SIDS, anaphylactic reaction, cellulitis, autism, convulsion/grand mal convulsion, encephalopathy, hypotonia, neuropathy, somnolence and apnea.	Because these events are reported voluntarily from a population of uncertain size, it is not always possible to reliably estimate their frequencies or to establish a causal relationship to components of Tripedia vaccine.	[Image] Image caption: "The FDA's online Biologics Blood Vaccines document admits on its package insert that their vaccination can cause autism as one of many adverse reactions.	0	0	0	0	0	0	0	0	1	0	0	0	0	0	0	0	0	0	0	0	0	0	0	0	0	0	0	1	0	0	0	0	0	0	0	0	0	0	0	0
146	tron-02200	FDA Confirms DTaP Vaccine Causes Autism in November 2017	false	5	Because these events are reported voluntarily from a population of uncertain size, it is not always possible to reliably estimate their frequencies or to establish a causal relationship to components of Tripedia vaccine.	These adverse events reported during post-approval use of Tripedia vaccine include idiopathic thrombocytopenic purpura, SIDS, anaphylactic reaction, cellulitis, autism, convulsion/grand mal convulsion, encephalopathy, hypotonia, neuropathy, somnolence and apnea.	Events were included in this list because of the seriousness or frequency of reporting.	[Image] Image caption: "The FDA's online Biologics Blood Vaccines document admits on its package insert that their vaccination can cause autism as one of many adverse reactions.	" Acellular Pertussis Vaccine Concentrates (For Further Manufacturing Use) are produced by The Research Foundation for Microbial Diseases of Osaka University (BIKEN), Osaka, Japan, under United States (US) license, and are combined with diphtheria and tetanus toxoids manufactured by	0	0	0	0	0	0	0	0	1	0	0	0	0	0	0	0	0	0	0	0	0	0	0	0	0	0	0	1	0	0	0	0	0	0	0	0	0	0	0	0
147	tron-02200	FDA Confirms DTaP Vaccine Causes Autism in November 2017	false	6	[Image] Image caption: "The FDA's online Biologics Blood Vaccines document admits on its package insert that their vaccination can cause autism as one of many adverse reactions.	Events were included in this list because of the seriousness or frequency of reporting.	Because these events are reported voluntarily from a population of uncertain size, it is not always possible to reliably estimate their frequencies or to establish a causal relationship to components of Tripedia vaccine.	" Acellular Pertussis Vaccine Concentrates (For Further Manufacturing Use) are produced by The Research Foundation for Microbial Diseases of Osaka University (BIKEN), Osaka, Japan, under United States (US) license, and are combined with diphtheria and tetanus toxoids manufactured by	Sanofi Pasteur Inc.	0	0	0	0	0	0	0	0	0	0	0	0	0	0	0	0	0	0	0	0	0	0	0	0	0	0	0	0	0	0	0	0	0	0	0	0	0	0	0	0
148	tron-02200	FDA Confirms DTaP Vaccine Causes Autism in November 2017	false	7	" Acellular Pertussis Vaccine Concentrates (For Further Manufacturing Use) are produced by The Research Foundation for Microbial Diseases of Osaka University (BIKEN), Osaka, Japan, under United States (US) license, and are combined with diphtheria and tetanus toxoids manufactured by	Because these events are reported voluntarily from a population of uncertain size, it is not always possible to reliably estimate their frequencies or to establish a causal relationship to components of Tripedia vaccine.	[Image] Image caption: "The FDA's online Biologics Blood Vaccines document admits on its package insert that their vaccination can cause autism as one of many adverse reactions.	Sanofi Pasteur Inc.	Tripedia vaccine is filled, labeled, packaged, and released by Sanofi Pasteur Inc.	0	0	0	0	0	0	0	0	0	0	0	0	0	0	0	0	0	0	0	0	0	0	0	0	0	0	0	0	0	0	0	0	0	0	0	0	0	0	0	0
149	tron-02200	FDA Confirms DTaP Vaccine Causes Autism in November 2017	false	8	Sanofi Pasteur Inc.	[Image] Image caption: "The FDA's online Biologics Blood Vaccines document admits on its package insert that their vaccination can cause autism as one of many adverse reactions.	" Acellular Pertussis Vaccine Concentrates (For Further Manufacturing Use) are produced by The Research Foundation for Microbial Diseases of Osaka University (BIKEN), Osaka, Japan, under United States (US) license, and are combined with diphtheria and tetanus toxoids manufactured by	Tripedia vaccine is filled, labeled, packaged, and released by Sanofi Pasteur Inc.	What's in Tripedia?	0	0	0	0	0	0	0	0	0	0	0	0	0	0	0	0	0	0	0	0	0	0	0	0	0	0	0	0	0	0	0	0	0	0	0	0	0	0	0	0
150	tron-02200	FDA Confirms DTaP Vaccine Causes Autism in November 2017	false	9	Tripedia vaccine is filled, labeled, packaged, and released by Sanofi Pasteur Inc.	" Acellular Pertussis Vaccine Concentrates (For Further Manufacturing Use) are produced by The Research Foundation for Microbial Diseases of Osaka University (BIKEN), Osaka, Japan, under United States (US) license, and are combined with diphtheria and tetanus toxoids manufactured by	Sanofi Pasteur Inc.	What's in Tripedia?	According to the Tripedia's package insert, some ingredients include: Bovine extract, formaldehyde used to inactivate microorganisms a couple of times, ammonium sulfate, aluminum potassium sulfate and two growth mediums: modified Mueller and Miller is one; the other is Stainer-Scholte medium.	0	0	0	0	0	0	0	0	0	0	0	1	0	0	0	0	0	0	0	0	0	0	0	0	0	0	0	0	0	0	0	0	0	0	0	0	0	0	0	1
151	tron-02200	FDA Confirms DTaP Vaccine Causes Autism in November 2017	false	10	What's in Tripedia?	Sanofi Pasteur Inc.	Tripedia vaccine is filled, labeled, packaged, and released by Sanofi Pasteur Inc.	According to the Tripedia's package insert, some ingredients include: Bovine extract, formaldehyde used to inactivate microorganisms a couple of times, ammonium sulfate, aluminum potassium sulfate and two growth mediums: modified Mueller and Miller is one; the other is Stainer-Scholte medium.	What is the content of these two growth mediums? Mueller and Miller medium contains: Glucose, sodium chloride, sodium phosphate dibasic, monopotassium, phosphate, magnesium sulfate hydrate, ferrous sulfate heptahydrate, cysteine hydrochloride, tyrosine hydrochloride, uracil hydrochloride, Ca-pantothenate in ethanol, thiamine in ethanol, pyridoxine-hydrochloride in ethanol, riboflavin in ethanol, …	0	0	0	0	0	0	0	0	0	0	0	1	0	0	0	0	0	0	0	0	0	0	0	0	0	0	0	0	0	0	0	0	0	0	0	0	0	0	0	1
152	tron-02200	FDA Confirms DTaP Vaccine Causes Autism in November 2017	false	11	According to the Tripedia's package insert, some ingredients include: Bovine extract, formaldehyde used to inactivate microorganisms a couple of times, ammonium sulfate, aluminum potassium sulfate and two growth mediums: modified Mueller and Miller is one; the other is Stainer-Scholte medium.	Tripedia vaccine is filled, labeled, packaged, and released by Sanofi Pasteur Inc.	What's in Tripedia?	What is the content of these two growth mediums? Mueller and Miller medium contains: Glucose, sodium chloride, sodium phosphate dibasic, monopotassium, phosphate, magnesium sulfate hydrate, ferrous sulfate heptahydrate, cysteine hydrochloride, tyrosine hydrochloride, uracil hydrochloride, Ca-pantothenate in ethanol, thiamine in ethanol, pyridoxine-hydrochloride in ethanol, riboflavin in ethanol, …	casein [milk protein] solution.	0	0	0	0	0	0	0	0	0	0	0	1	0	0	0	0	0	0	0	0	0	0	0	0	0	0	0	0	0	0	0	0	0	0	0	0	0	0	0	1
153	tron-02200	FDA Confirms DTaP Vaccine Causes Autism in November 2017	false	12	What is the content of these two growth mediums? Mueller and Miller medium contains: Glucose, sodium chloride, sodium phosphate dibasic, monopotassium, phosphate, magnesium sulfate hydrate, ferrous sulfate heptahydrate, cysteine hydrochloride, tyrosine hydrochloride, uracil hydrochloride, Ca-pantothenate in ethanol, thiamine in ethanol, pyridoxine-hydrochloride in ethanol, riboflavin in ethanol, …	What's in Tripedia?	According to the Tripedia's package insert, some ingredients include: Bovine extract, formaldehyde used to inactivate microorganisms a couple of times, ammonium sulfate, aluminum potassium sulfate and two growth mediums: modified Mueller and Miller is one; the other is Stainer-Scholte medium.	casein [milk protein] solution.	Basically a mixture of sugar, salt, amino acids, vitamins, and minerals.	0	0	0	0	0	0	0	0	0	0	0	1	0	0	0	0	0	0	0	0	0	0	0	0	0	0	0	0	0	0	0	0	0	0	0	0	0	0	0	1
154	tron-02200	FDA Confirms DTaP Vaccine Causes Autism in November 2017	false	13	casein [milk protein] solution.	According to the Tripedia's package insert, some ingredients include: Bovine extract, formaldehyde used to inactivate microorganisms a couple of times, ammonium sulfate, aluminum potassium sulfate and two growth mediums: modified Mueller and Miller is one; the other is Stainer-Scholte medium.	What is the content of these two growth mediums? Mueller and Miller medium contains: Glucose, sodium chloride, sodium phosphate dibasic, monopotassium, phosphate, magnesium sulfate hydrate, ferrous sulfate heptahydrate, cysteine hydrochloride, tyrosine hydrochloride, uracil hydrochloride, Ca-pantothenate in ethanol, thiamine in ethanol, pyridoxine-hydrochloride in ethanol, riboflavin in ethanol, …	Basically a mixture of sugar, salt, amino acids, vitamins, and minerals.	While Stainer-Scholte medium has the following ingredients: Tris hydrochloride, tris base, glutamate (monosodium salt)	0	0	0	0	0	0	0	0	0	0	0	1	0	0	0	0	0	0	0	0	0	0	0	0	0	0	0	0	0	0	0	0	0	0	0	0	0	0	0	0
155	tron-02200	FDA Confirms DTaP Vaccine Causes Autism in November 2017	false	14	Basically a mixture of sugar, salt, amino acids, vitamins, and minerals.	What is the content of these two growth mediums? Mueller and Miller medium contains: Glucose, sodium chloride, sodium phosphate dibasic, monopotassium, phosphate, magnesium sulfate hydrate, ferrous sulfate heptahydrate, cysteine hydrochloride, tyrosine hydrochloride, uracil hydrochloride, Ca-pantothenate in ethanol, thiamine in ethanol, pyridoxine-hydrochloride in ethanol, riboflavin in ethanol, …	casein [milk protein] solution.	While Stainer-Scholte medium has the following ingredients: Tris hydrochloride, tris base, glutamate (monosodium salt)	[MSG], proline, salt, monopotassium phosphate, potassium chloride, magnesium chloride, calcium chloride, ferrous sulfate, ascorbic acid, niacin, glutathione.	0	0	0	0	0	0	0	0	0	0	0	1	0	0	0	0	0	0	0	0	0	0	0	0	0	0	0	0	0	0	0	0	0	0	0	0	0	0	0	0
156	tron-02200	FDA Confirms DTaP Vaccine Causes Autism in November 2017	false	15	While Stainer-Scholte medium has the following ingredients: Tris hydrochloride, tris base, glutamate (monosodium salt)	casein [milk protein] solution.	Basically a mixture of sugar, salt, amino acids, vitamins, and minerals.	[MSG], proline, salt, monopotassium phosphate, potassium chloride, magnesium chloride, calcium chloride, ferrous sulfate, ascorbic acid, niacin, glutathione.	The vaccine is formulated without preservatives, but contains a trace amount of thimerosal [(mercury derivative), (≤0.3 μg mercury/dose)] from the manufacturing process.	0	0	0	0	0	0	0	0	0	0	0	1	0	0	0	0	0	0	0	0	0	0	0	0	0	0	0	0	0	0	0	0	0	0	0	0	0	0	0	0
157	tron-02200	FDA Confirms DTaP Vaccine Causes Autism in November 2017	false	16	[MSG], proline, salt, monopotassium phosphate, potassium chloride, magnesium chloride, calcium chloride, ferrous sulfate, ascorbic acid, niacin, glutathione.	Basically a mixture of sugar, salt, amino acids, vitamins, and minerals.	While Stainer-Scholte medium has the following ingredients: Tris hydrochloride, tris base, glutamate (monosodium salt)	The vaccine is formulated without preservatives, but contains a trace amount of thimerosal [(mercury derivative), (≤0.3 μg mercury/dose)] from the manufacturing process.	Each 0.5 mL dose also contains, by assay, not more than 0.170 mg of aluminum and not more than 100 μg(0.02%) of residual formaldehyde.	0	0	0	0	0	0	0	0	0	0	0	1	0	0	0	0	0	0	0	0	0	0	0	0	0	0	0	0	0	0	0	0	0	0	0	0	0	0	0	0
158	tron-02200	FDA Confirms DTaP Vaccine Causes Autism in November 2017	false	17	The vaccine is formulated without preservatives, but contains a trace amount of thimerosal [(mercury derivative), (≤0.3 μg mercury/dose)] from the manufacturing process.	While Stainer-Scholte medium has the following ingredients: Tris hydrochloride, tris base, glutamate (monosodium salt)	[MSG], proline, salt, monopotassium phosphate, potassium chloride, magnesium chloride, calcium chloride, ferrous sulfate, ascorbic acid, niacin, glutathione.	Each 0.5 mL dose also contains, by assay, not more than 0.170 mg of aluminum and not more than 100 μg(0.02%) of residual formaldehyde.	The vaccine contains gelatin and polysorbate 80 (Tween-80), which are used in the production of the pertussis concentrate.	0	0	0	0	0	0	0	0	0	0	0	1	0	0	0	0	0	0	0	0	0	0	0	0	0	0	0	0	0	0	0	0	0	0	0	0	0	0	0	0
159	tron-02200	FDA Confirms DTaP Vaccine Causes Autism in November 2017	false	18	Each 0.5 mL dose also contains, by assay, not more than 0.170 mg of aluminum and not more than 100 μg(0.02%) of residual formaldehyde.	[MSG], proline, salt, monopotassium phosphate, potassium chloride, magnesium chloride, calcium chloride, ferrous sulfate, ascorbic acid, niacin, glutathione.	The vaccine is formulated without preservatives, but contains a trace amount of thimerosal [(mercury derivative), (≤0.3 μg mercury/dose)] from the manufacturing process.	The vaccine contains gelatin and polysorbate 80 (Tween-80), which are used in the production of the pertussis concentrate.	"Probable cause" ingredients for adverse reactions include: casein, to which some children are allergic; MSG-an excitotoxin; thimerosal-ethyl mercury; aluminum; formaldehyde; gelatin; and polysorbate 80.	0	0	0	0	0	0	0	0	0	0	0	1	0	0	0	0	0	0	0	0	0	0	0	0	0	0	0	0	0	0	0	0	0	0	0	0	0	0	0	0
160	tron-02200	FDA Confirms DTaP Vaccine Causes Autism in November 2017	false	19	The vaccine contains gelatin and polysorbate 80 (Tween-80), which are used in the production of the pertussis concentrate.	The vaccine is formulated without preservatives, but contains a trace amount of thimerosal [(mercury derivative), (≤0.3 μg mercury/dose)] from the manufacturing process.	Each 0.5 mL dose also contains, by assay, not more than 0.170 mg of aluminum and not more than 100 μg(0.02%) of residual formaldehyde.	"Probable cause" ingredients for adverse reactions include: casein, to which some children are allergic; MSG-an excitotoxin; thimerosal-ethyl mercury; aluminum; formaldehyde; gelatin; and polysorbate 80.	Тhis is a very controversial topic.	0	0	0	0	0	0	0	0	0	0	0	1	0	0	0	0	0	0	0	0	0	0	0	0	0	0	0	0	0	0	0	0	0	0	0	0	0	0	0	0
161	tron-02200	FDA Confirms DTaP Vaccine Causes Autism in November 2017	false	20	"Probable cause" ingredients for adverse reactions include: casein, to which some children are allergic; MSG-an excitotoxin; thimerosal-ethyl mercury; aluminum; formaldehyde; gelatin; and polysorbate 80.	Each 0.5 mL dose also contains, by assay, not more than 0.170 mg of aluminum and not more than 100 μg(0.02%) of residual formaldehyde.	The vaccine contains gelatin and polysorbate 80 (Tween-80), which are used in the production of the pertussis concentrate.	Тhis is a very controversial topic.	Seek the advice of your physician or other qualified health provider with any questions you may have.	0	0	0	0	0	0	0	0	0	0	0	1	0	0	0	0	0	0	0	0	0	0	0	0	0	0	0	0	0	0	0	0	0	0	0	0	0	0	0	0
162	tron-02200	FDA Confirms DTaP Vaccine Causes Autism in November 2017	false	21	Тhis is a very controversial topic.	The vaccine contains gelatin and polysorbate 80 (Tween-80), which are used in the production of the pertussis concentrate.	"Probable cause" ingredients for adverse reactions include: casein, to which some children are allergic; MSG-an excitotoxin; thimerosal-ethyl mercury; aluminum; formaldehyde; gelatin; and polysorbate 80.	Seek the advice of your physician or other qualified health provider with any questions you may have.		0	0	0	0	0	0	0	0	0	0	0	0	0	0	0	0	0	0	0	0	0	0	0	0	0	0	0	0	0	0	0	0	0	0	0	0	0	0	0	0
163	tron-02200	FDA Confirms DTaP Vaccine Causes Autism in November 2017	false	22	Seek the advice of your physician or other qualified health provider with any questions you may have.	"Probable cause" ingredients for adverse reactions include: casein, to which some children are allergic; MSG-an excitotoxin; thimerosal-ethyl mercury; aluminum; formaldehyde; gelatin; and polysorbate 80.	Тhis is a very controversial topic.			0	0	0	0	0	0	0	0	0	0	0	1	0	0	0	0	0	0	0	0	0	0	0	0	0	0	0	0	0	0	0	0	0	0	0	0	0	0	0	0
164	snes-04475	The Burger King fast food chain "admitted it has been selling burgers that contain horsemeat."	false	0	n a piece of highly disturbing news, Burger King has now admitted after continuous denial that it has actually been <b> selling UK customers both burgers and Whoppers that contain horsemeat.			<b>	This admission comes just after The Guardian reports that Burger King reps offered a round of 'absolute assurances' to customers that it did not ever use horsemeat in its products.	0	0	0	0	0	0	0	0	0	0	1	0	0	0	0	0	0	0	0	0	0	0	0	0	0	0	0	0	0	0	0	0	0	0	0	0	1	0	0	0
165	snes-04475	The Burger King fast food chain "admitted it has been selling burgers that contain horsemeat."	false	1	<b>		n a piece of highly disturbing news, Burger King has now admitted after continuous denial that it has actually been <b> selling UK customers both burgers and Whoppers that contain horsemeat.	This admission comes just after The Guardian reports that Burger King reps offered a round of 'absolute assurances' to customers that it did not ever use horsemeat in its products.	A series of tests done on the burger products now reveal that Burger King has been issuing completely phony statements, with burgers made for the fast food chain from the Irish company Silvercrest containing measurable levels of horsemeat.	0	0	0	0	0	0	1	0	0	0	1	0	0	0	0	0	0	0	0	0	1	0	0	0	0	0	0	0	0	0	0	0	0	0	0	0	1	0	0	0
166	snes-04475	The Burger King fast food chain "admitted it has been selling burgers that contain horsemeat."	false	2	This admission comes just after The Guardian reports that Burger King reps offered a round of 'absolute assurances' to customers that it did not ever use horsemeat in its products.	n a piece of highly disturbing news, Burger King has now admitted after continuous denial that it has actually been <b> selling UK customers both burgers and Whoppers that contain horsemeat.	<b>	A series of tests done on the burger products now reveal that Burger King has been issuing completely phony statements, with burgers made for the fast food chain from the Irish company Silvercrest containing measurable levels of horsemeat.	It's important to note this is the same company that processes meat for Tesco, Asda, and the Co-op.	0	0	0	0	0	0	1	0	0	0	0	0	0	0	0	0	0	0	0	0	1	0	0	0	0	0	0	0	0	0	0	0	0	0	0	0	0	0	0	0
167	snes-04475	The Burger King fast food chain "admitted it has been selling burgers that contain horsemeat."	false	3	A series of tests done on the burger products now reveal that Burger King has been issuing completely phony statements, with burgers made for the fast food chain from the Irish company Silvercrest containing measurable levels of horsemeat.	<b>	This admission comes just after The Guardian reports that Burger King reps offered a round of 'absolute assurances' to customers that it did not ever use horsemeat in its products.	It's important to note this is the same company that processes meat for Tesco, Asda, and the Co-op.	The managers at Silvercrest have been revealed to be utilizing non-approved ingredients within their burger assortment - even for 'household brands'.	0	0	0	0	0	0	1	0	0	0	0	0	0	0	0	0	0	0	0	0	1	0	0	0	0	0	0	0	0	0	0	0	0	0	0	0	0	0	0	0
168	snes-04475	The Burger King fast food chain "admitted it has been selling burgers that contain horsemeat."	false	4	It's important to note this is the same company that processes meat for Tesco, Asda, and the Co-op.	This admission comes just after The Guardian reports that Burger King reps offered a round of 'absolute assurances' to customers that it did not ever use horsemeat in its products.	A series of tests done on the burger products now reveal that Burger King has been issuing completely phony statements, with burgers made for the fast food chain from the Irish company Silvercrest containing measurable levels of horsemeat.	The managers at Silvercrest have been revealed to be utilizing non-approved ingredients within their burger assortment - even for 'household brands'.	<b> Burger King Admits to Horsemeat in Whoppers, Burgers <b> Burger King admitted just a few hours ago that the samples did in fact contain horsemeat: "Four samples recently taken from the Silvercrest plant have shown the presence of very small trace levels of equine DNA...	0	0	0	0	0	0	0	0	0	0	0	0	0	0	0	0	0	0	0	0	0	0	0	0	0	0	0	0	0	0	0	0	0	0	0	0	0	0	0	0
169	snes-04475	The Burger King fast food chain "admitted it has been selling burgers that contain horsemeat."	false	5	The managers at Silvercrest have been revealed to be utilizing non-approved ingredients within their burger assortment - even for 'household brands'.	A series of tests done on the burger products now reveal that Burger King has been issuing completely phony statements, with burgers made for the fast food chain from the Irish company Silvercrest containing measurable levels of horsemeat.	It's important to note this is the same company that processes meat for Tesco, Asda, and the Co-op.	<b> Burger King Admits to Horsemeat in Whoppers, Burgers <b> Burger King admitted just a few hours ago that the samples did in fact contain horsemeat: "Four samples recently taken from the Silvercrest plant have shown the presence of very small trace levels of equine DNA...	we have established that Silvercrest used a small percentage of beef imported from a non-approved supplier in Poland.	0	0	0	0	0	0	0	0	0	0	1	0	0	0	0	0	0	0	0	0	0	0	0	0	0	0	0	0	0	0	0	0	0	0	0	0	1	0	0	0
170	snes-04475	The Burger King fast food chain "admitted it has been selling burgers that contain horsemeat."	false	6	<b> Burger King Admits to Horsemeat in Whoppers, Burgers <b> Burger King admitted just a few hours ago that the samples did in fact contain horsemeat: "Four samples recently taken from the Silvercrest plant have shown the presence of very small trace levels of equine DNA...	It's important to note this is the same company that processes meat for Tesco, Asda, and the Co-op.	The managers at Silvercrest have been revealed to be utilizing non-approved ingredients within their burger assortment - even for 'household brands'.	we have established that Silvercrest used a small percentage of beef imported from a non-approved supplier in Poland.	This is a clear violation of our specifications, and we have terminated our relationship with them.	0	0	0	0	0	0	0	0	0	0	1	0	0	0	0	0	0	0	0	0	0	0	0	0	0	0	0	0	0	0	0	0	0	0	0	0	1	1	0	0
171	snes-04475	The Burger King fast food chain "admitted it has been selling burgers that contain horsemeat."	false	7	we have established that Silvercrest used a small percentage of beef imported from a non-approved supplier in Poland.	The managers at Silvercrest have been revealed to be utilizing non-approved ingredients within their burger assortment - even for 'household brands'.	<b> Burger King Admits to Horsemeat in Whoppers, Burgers <b> Burger King admitted just a few hours ago that the samples did in fact contain horsemeat: "Four samples recently taken from the Silvercrest plant have shown the presence of very small trace levels of equine DNA...	This is a clear violation of our specifications, and we have terminated our relationship with them.	" It is not yet clear which of these top brands could be containing such concerning ingredients as horse meat and other 'meat cut offs'.	0	0	0	0	0	0	0	0	0	0	0	0	0	0	0	0	0	0	0	0	0	0	0	0	0	0	0	0	0	0	0	0	0	0	0	0	0	0	0	0
172	snes-04475	The Burger King fast food chain "admitted it has been selling burgers that contain horsemeat."	false	8	This is a clear violation of our specifications, and we have terminated our relationship with them.	<b> Burger King Admits to Horsemeat in Whoppers, Burgers <b> Burger King admitted just a few hours ago that the samples did in fact contain horsemeat: "Four samples recently taken from the Silvercrest plant have shown the presence of very small trace levels of equine DNA...	we have established that Silvercrest used a small percentage of beef imported from a non-approved supplier in Poland.	" It is not yet clear which of these top brands could be containing such concerning ingredients as horse meat and other 'meat cut offs'.	What is known is that <b> tens of thousands of burgers <b> from suppliers like Silvercrest and others in Germany have been shipped into Burger King alone to meet demand just in the UK.	0	0	0	0	0	0	0	0	0	0	0	0	0	0	0	0	0	0	0	0	0	0	0	0	0	0	0	0	0	0	0	0	0	0	0	0	0	0	0	0
173	snes-04475	The Burger King fast food chain "admitted it has been selling burgers that contain horsemeat."	false	9	" It is not yet clear which of these top brands could be containing such concerning ingredients as horse meat and other 'meat cut offs'.	we have established that Silvercrest used a small percentage of beef imported from a non-approved supplier in Poland.	This is a clear violation of our specifications, and we have terminated our relationship with them.	What is known is that <b> tens of thousands of burgers <b> from suppliers like Silvercrest and others in Germany have been shipped into Burger King alone to meet demand just in the UK.	According to the Daily Mail report on the study results, the horsemeat contamination can be traced back to a full year, or at least since last May.	0	0	0	0	0	0	0	0	0	0	0	0	0	0	0	0	0	0	0	0	0	0	0	0	0	0	0	0	0	0	0	0	0	0	0	0	0	0	0	0
174	snes-04475	The Burger King fast food chain "admitted it has been selling burgers that contain horsemeat."	false	10	What is known is that <b> tens of thousands of burgers <b> from suppliers like Silvercrest and others in Germany have been shipped into Burger King alone to meet demand just in the UK.	This is a clear violation of our specifications, and we have terminated our relationship with them.	" It is not yet clear which of these top brands could be containing such concerning ingredients as horse meat and other 'meat cut offs'.	According to the Daily Mail report on the study results, the horsemeat contamination can be traced back to a full year, or at least since last May.	The investigation into this issue started after the Food Safety Authority of Ireland found that burgers out of Ireland contained horsemeat.	0	0	0	0	0	0	0	0	0	0	1	0	0	0	0	0	0	0	0	0	0	0	0	0	0	0	0	0	0	0	0	0	0	0	0	0	1	0	0	0
175	snes-04475	The Burger King fast food chain "admitted it has been selling burgers that contain horsemeat."	false	11	According to the Daily Mail report on the study results, the horsemeat contamination can be traced back to a full year, or at least since last May.	" It is not yet clear which of these top brands could be containing such concerning ingredients as horse meat and other 'meat cut offs'.	What is known is that <b> tens of thousands of burgers <b> from suppliers like Silvercrest and others in Germany have been shipped into Burger King alone to meet demand just in the UK.	The investigation into this issue started after the Food Safety Authority of Ireland found that burgers out of Ireland contained horsemeat.	The disturbing findings highlight yet another reason not to consumer fast food, which contains a host of problematic substances such as ingredients banned in other nations.	0	0	0	0	0	0	0	0	0	0	0	1	0	0	0	0	0	0	0	0	0	0	0	0	0	0	0	0	0	0	0	0	0	0	0	0	0	0	1	0
176	snes-04475	The Burger King fast food chain "admitted it has been selling burgers that contain horsemeat."	false	12	The investigation into this issue started after the Food Safety Authority of Ireland found that burgers out of Ireland contained horsemeat.	What is known is that <b> tens of thousands of burgers <b> from suppliers like Silvercrest and others in Germany have been shipped into Burger King alone to meet demand just in the UK.	According to the Daily Mail report on the study results, the horsemeat contamination can be traced back to a full year, or at least since last May.	The disturbing findings highlight yet another reason not to consumer fast food, which contains a host of problematic substances such as ingredients banned in other nations.		0	0	0	0	0	0	0	0	0	0	0	1	0	0	0	0	0	0	0	0	0	0	0	0	0	0	0	0	0	0	0	0	0	0	0	0	0	0	1	0
177	snes-04475	The Burger King fast food chain "admitted it has been selling burgers that contain horsemeat."	false	13	The disturbing findings highlight yet another reason not to consumer fast food, which contains a host of problematic substances such as ingredients banned in other nations.	According to the Daily Mail report on the study results, the horsemeat contamination can be traced back to a full year, or at least since last May.	The investigation into this issue started after the Food Safety Authority of Ireland found that burgers out of Ireland contained horsemeat.			0	0	0	0	0	0	0	0	0	0	0	0	0	0	0	0	0	0	0	0	0	0	0	0	0	0	0	0	0	0	0	0	0	0	0	0	0	0	0	0
178	tron-01792	Paul Ryan: Women Using Birth Control Commit Murder	false	0	Paul Ryan: "If There Was A Legitimate Way To Have Intercourse And Not Get Pregnant, God Would Have Included It In His Holy Books" House Speaker Paul Ryan (R-WI) on Sunday refused to say if some women would lose access to birth control benefits after Republicans repeal President Barack Obama's health care reform law.			The Wisconsin Republican promised during an interview on CNN that the repeal of Obamacare would lower the costs of health care by providing "vouchers" to poor Americans.	CNN host Jake Tapper noted that many women were paying nothing for birth control thanks to an Affordable Care Act mandate.	0	0	0	0	0	0	0	0	0	0	0	1	0	0	0	0	0	0	0	0	0	0	0	0	0	0	0	0	0	0	0	0	0	0	0	0	0	0	1	0
179	tron-01792	Paul Ryan: Women Using Birth Control Commit Murder	false	1	The Wisconsin Republican promised during an interview on CNN that the repeal of Obamacare would lower the costs of health care by providing "vouchers" to poor Americans.		Paul Ryan: "If There Was A Legitimate Way To Have Intercourse And Not Get Pregnant, God Would Have Included It In His Holy Books" House Speaker Paul Ryan (R-WI) on Sunday refused to say if some women would lose access to birth control benefits after Republicans repeal President Barack Obama's health care reform law.	CNN host Jake Tapper noted that many women were paying nothing for birth control thanks to an Affordable Care Act mandate.	"Is that going to end?" he wondered.	0	0	0	0	0	0	0	0	0	0	0	0	0	0	0	0	0	0	0	0	0	0	0	0	0	0	0	0	0	0	0	0	0	0	0	0	0	0	0	0
180	tron-01792	Paul Ryan: Women Using Birth Control Commit Murder	false	2	CNN host Jake Tapper noted that many women were paying nothing for birth control thanks to an Affordable Care Act mandate.	Paul Ryan: "If There Was A Legitimate Way To Have Intercourse And Not Get Pregnant, God Would Have Included It In His Holy Books" House Speaker Paul Ryan (R-WI) on Sunday refused to say if some women would lose access to birth control benefits after Republicans repeal President Barack Obama's health care reform law.	The Wisconsin Republican promised during an interview on CNN that the repeal of Obamacare would lower the costs of health care by providing "vouchers" to poor Americans.	"Is that going to end?" he wondered.	"Look, I'm not going to get into all the nitty-gritty details of these things," Ryan replied curly.	0	0	0	0	0	0	0	0	0	0	0	0	0	0	0	0	0	0	0	0	0	0	0	0	0	0	0	0	0	0	0	0	0	0	0	0	0	0	0	0
181	tron-01792	Paul Ryan: Women Using Birth Control Commit Murder	false	3	"Is that going to end?" he wondered.	The Wisconsin Republican promised during an interview on CNN that the repeal of Obamacare would lower the costs of health care by providing "vouchers" to poor Americans.	CNN host Jake Tapper noted that many women were paying nothing for birth control thanks to an Affordable Care Act mandate.	"Look, I'm not going to get into all the nitty-gritty details of these things," Ryan replied curly.	"I'm not a preacher, nor am I a holy man, but the fact to the matter is that Obamacare is bad for our economy, it's bad for Americans, both poor ones and ones who aren't, overall, it's a bad program and a bad piece of legislation and that's why it's gotta go," Ryan argued stubbornly, all the while ignoring the question.	0	0	0	0	0	0	0	0	0	0	0	0	0	0	0	0	0	0	0	0	0	0	0	0	0	0	0	0	0	0	0	0	0	0	0	0	0	0	0	0
182	tron-01792	Paul Ryan: Women Using Birth Control Commit Murder	false	4	"Look, I'm not going to get into all the nitty-gritty details of these things," Ryan replied curly.	CNN host Jake Tapper noted that many women were paying nothing for birth control thanks to an Affordable Care Act mandate.	"Is that going to end?" he wondered.	"I'm not a preacher, nor am I a holy man, but the fact to the matter is that Obamacare is bad for our economy, it's bad for Americans, both poor ones and ones who aren't, overall, it's a bad program and a bad piece of legislation and that's why it's gotta go," Ryan argued stubbornly, all the while ignoring the question.	"And if our biology allowed for a safe way to have intercourse, if we were meant to have intercourse completely naturally and not get pregnant because of it, then God would have included something about it in one of his Holy Books.	0	0	0	0	0	0	0	0	0	0	0	0	0	0	0	0	0	0	0	0	0	0	0	0	0	0	0	0	0	0	0	0	0	0	0	0	0	0	0	0
183	tron-01792	Paul Ryan: Women Using Birth Control Commit Murder	false	5	"I'm not a preacher, nor am I a holy man, but the fact to the matter is that Obamacare is bad for our economy, it's bad for Americans, both poor ones and ones who aren't, overall, it's a bad program and a bad piece of legislation and that's why it's gotta go," Ryan argued stubbornly, all the while ignoring the question.	"Is that going to end?" he wondered.	"Look, I'm not going to get into all the nitty-gritty details of these things," Ryan replied curly.	"And if our biology allowed for a safe way to have intercourse, if we were meant to have intercourse completely naturally and not get pregnant because of it, then God would have included something about it in one of his Holy Books.	Now, I haven't found anything on the subject - and not for lack of looking, Jake - have you, perhaps?" "We're going completely off topic here," Tapper tried to get the conversation back on track.	0	0	0	0	0	0	0	0	1	0	0	0	0	0	0	0	0	0	0	0	0	0	0	0	0	0	1	0	0	0	0	0	0	0	0	0	0	0	0	0
184	tron-01792	Paul Ryan: Women Using Birth Control Commit Murder	false	6	"And if our biology allowed for a safe way to have intercourse, if we were meant to have intercourse completely naturally and not get pregnant because of it, then God would have included something about it in one of his Holy Books.	"Look, I'm not going to get into all the nitty-gritty details of these things," Ryan replied curly.	"I'm not a preacher, nor am I a holy man, but the fact to the matter is that Obamacare is bad for our economy, it's bad for Americans, both poor ones and ones who aren't, overall, it's a bad program and a bad piece of legislation and that's why it's gotta go," Ryan argued stubbornly, all the while ignoring the question.	Now, I haven't found anything on the subject - and not for lack of looking, Jake - have you, perhaps?" "We're going completely off topic here," Tapper tried to get the conversation back on track.	"Do you or do you not admit that," he attempted to form a sentence, when Ryan rudely interrupted him and said, "Look Jake, I respect everything you're trying to do here, I get you're a big-shot reporter, anchor or whatever they call you people these days, it doesn't even matter.	0	0	0	0	0	0	0	0	1	0	0	0	0	0	0	0	0	0	0	0	0	0	0	0	0	0	0	1	0	0	0	0	0	0	0	0	0	0	0	0
185	tron-01792	Paul Ryan: Women Using Birth Control Commit Murder	false	7	Now, I haven't found anything on the subject - and not for lack of looking, Jake - have you, perhaps?" "We're going completely off topic here," Tapper tried to get the conversation back on track.	"I'm not a preacher, nor am I a holy man, but the fact to the matter is that Obamacare is bad for our economy, it's bad for Americans, both poor ones and ones who aren't, overall, it's a bad program and a bad piece of legislation and that's why it's gotta go," Ryan argued stubbornly, all the while ignoring the question.	"And if our biology allowed for a safe way to have intercourse, if we were meant to have intercourse completely naturally and not get pregnant because of it, then God would have included something about it in one of his Holy Books.	"Do you or do you not admit that," he attempted to form a sentence, when Ryan rudely interrupted him and said, "Look Jake, I respect everything you're trying to do here, I get you're a big-shot reporter, anchor or whatever they call you people these days, it doesn't even matter.	The fact to the matter is - we are in a situation here where the citizens of our country were led to believe that they actually had something to gain thanks to Obamacare.	0	0	0	0	0	0	0	0	0	0	0	0	0	0	0	0	0	0	0	0	0	0	0	0	0	0	0	0	0	0	0	0	0	0	0	0	0	0	0	0
186	tron-01792	Paul Ryan: Women Using Birth Control Commit Murder	false	8	"Do you or do you not admit that," he attempted to form a sentence, when Ryan rudely interrupted him and said, "Look Jake, I respect everything you're trying to do here, I get you're a big-shot reporter, anchor or whatever they call you people these days, it doesn't even matter.	"And if our biology allowed for a safe way to have intercourse, if we were meant to have intercourse completely naturally and not get pregnant because of it, then God would have included something about it in one of his Holy Books.	Now, I haven't found anything on the subject - and not for lack of looking, Jake - have you, perhaps?" "We're going completely off topic here," Tapper tried to get the conversation back on track.	The fact to the matter is - we are in a situation here where the citizens of our country were led to believe that they actually had something to gain thanks to Obamacare.	Yet, it was never explained to them that all those benefits had to come from somewhere, and the former president never told them that they came from hard-working Americans whose taxes were raised to pay for the so-called free birth control.	0	0	0	0	0	0	0	0	0	0	0	0	0	0	0	0	0	0	0	0	0	0	0	0	0	0	0	0	0	0	0	0	0	0	0	0	0	0	0	0
187	tron-01792	Paul Ryan: Women Using Birth Control Commit Murder	false	9	The fact to the matter is - we are in a situation here where the citizens of our country were led to believe that they actually had something to gain thanks to Obamacare.	Now, I haven't found anything on the subject - and not for lack of looking, Jake - have you, perhaps?" "We're going completely off topic here," Tapper tried to get the conversation back on track.	"Do you or do you not admit that," he attempted to form a sentence, when Ryan rudely interrupted him and said, "Look Jake, I respect everything you're trying to do here, I get you're a big-shot reporter, anchor or whatever they call you people these days, it doesn't even matter.	Yet, it was never explained to them that all those benefits had to come from somewhere, and the former president never told them that they came from hard-working Americans whose taxes were raised to pay for the so-called free birth control.	" "Now, how would you feel, Jake, if someone were to take a huge chunk of your hard-earned money and use it to give something to someone you've never met?"	0	0	0	0	0	0	0	0	0	0	0	0	0	0	0	0	0	0	0	0	0	0	0	0	0	0	0	0	0	0	0	0	0	0	0	0	0	0	0	0
188	tron-01792	Paul Ryan: Women Using Birth Control Commit Murder	false	10	Yet, it was never explained to them that all those benefits had to come from somewhere, and the former president never told them that they came from hard-working Americans whose taxes were raised to pay for the so-called free birth control.	"Do you or do you not admit that," he attempted to form a sentence, when Ryan rudely interrupted him and said, "Look Jake, I respect everything you're trying to do here, I get you're a big-shot reporter, anchor or whatever they call you people these days, it doesn't even matter.	The fact to the matter is - we are in a situation here where the citizens of our country were led to believe that they actually had something to gain thanks to Obamacare.	" "Now, how would you feel, Jake, if someone were to take a huge chunk of your hard-earned money and use it to give something to someone you've never met?"	Ryan asked the host.	0	0	0	0	0	0	0	0	1	0	0	0	0	0	0	0	0	0	0	0	0	0	0	0	0	0	1	0	0	0	0	0	0	0	0	0	0	0	0	0
189	tron-01792	Paul Ryan: Women Using Birth Control Commit Murder	false	11	" "Now, how would you feel, Jake, if someone were to take a huge chunk of your hard-earned money and use it to give something to someone you've never met?"	The fact to the matter is - we are in a situation here where the citizens of our country were led to believe that they actually had something to gain thanks to Obamacare.	Yet, it was never explained to them that all those benefits had to come from somewhere, and the former president never told them that they came from hard-working Americans whose taxes were raised to pay for the so-called free birth control.	Ryan asked the host.	"And the worst part is - nobody asked Americans whether or not they agree to their taxes being raised to help people they don't know, that very fact goes against the essence of capitalism.	0	0	0	0	0	0	0	0	1	0	0	0	0	0	0	0	0	0	0	0	0	0	0	0	1	0	0	0	0	0	0	0	0	0	0	0	0	0	0	0
190	tron-01792	Paul Ryan: Women Using Birth Control Commit Murder	false	12	Ryan asked the host.	Yet, it was never explained to them that all those benefits had to come from somewhere, and the former president never told them that they came from hard-working Americans whose taxes were raised to pay for the so-called free birth control.	" "Now, how would you feel, Jake, if someone were to take a huge chunk of your hard-earned money and use it to give something to someone you've never met?"	"And the worst part is - nobody asked Americans whether or not they agree to their taxes being raised to help people they don't know, that very fact goes against the essence of capitalism.	It's not effective and it's not efficient, which makes it the wrong solution from the start.	0	0	0	0	0	0	0	0	0	0	0	0	0	0	0	0	0	0	0	0	0	0	0	0	0	0	0	0	0	0	0	0	0	0	0	0	0	0	0	0
191	tron-01792	Paul Ryan: Women Using Birth Control Commit Murder	false	13	"And the worst part is - nobody asked Americans whether or not they agree to their taxes being raised to help people they don't know, that very fact goes against the essence of capitalism.	" "Now, how would you feel, Jake, if someone were to take a huge chunk of your hard-earned money and use it to give something to someone you've never met?"	Ryan asked the host.	It's not effective and it's not efficient, which makes it the wrong solution from the start.	That's why it needs to be repealed.	0	0	0	0	0	0	0	0	0	0	0	0	0	0	0	0	0	0	0	0	0	0	0	0	0	0	0	0	0	0	0	0	0	0	0	0	0	0	0	0
192	tron-01792	Paul Ryan: Women Using Birth Control Commit Murder	false	14	It's not effective and it's not efficient, which makes it the wrong solution from the start.	Ryan asked the host.	"And the worst part is - nobody asked Americans whether or not they agree to their taxes being raised to help people they don't know, that very fact goes against the essence of capitalism.	That's why it needs to be repealed.	The other part of the reason why women shouldn't be allowed to use birth control at all is the fact that, in doing so, they're committing murder and that goes against everything this country stands for.	0	0	0	0	0	0	0	0	0	0	0	0	0	0	0	0	0	0	0	0	0	0	0	0	0	0	0	0	0	0	0	0	0	0	0	0	0	0	0	0
193	tron-01792	Paul Ryan: Women Using Birth Control Commit Murder	false	15	That's why it needs to be repealed.	"And the worst part is - nobody asked Americans whether or not they agree to their taxes being raised to help people they don't know, that very fact goes against the essence of capitalism.	It's not effective and it's not efficient, which makes it the wrong solution from the start.	The other part of the reason why women shouldn't be allowed to use birth control at all is the fact that, in doing so, they're committing murder and that goes against everything this country stands for.	" "You have to understand, just like millions of Americans out there have to understand: God didn't want us to be able to have unprotected sex that wouldn't result in pregnancy.	0	0	0	0	0	0	0	0	0	0	0	0	0	0	0	0	0	0	0	0	0	0	0	0	0	0	0	0	0	0	0	0	0	0	0	0	0	0	0	0
194	tron-01792	Paul Ryan: Women Using Birth Control Commit Murder	false	16	The other part of the reason why women shouldn't be allowed to use birth control at all is the fact that, in doing so, they're committing murder and that goes against everything this country stands for.	It's not effective and it's not efficient, which makes it the wrong solution from the start.	That's why it needs to be repealed.	" "You have to understand, just like millions of Americans out there have to understand: God didn't want us to be able to have unprotected sex that wouldn't result in pregnancy.	That's not how we were designed and every time someone uses birth control, they're effectively going against God's wishes and committing manslaughter.	0	0	0	0	0	0	0	1	1	0	0	0	0	0	0	0	0	0	0	0	0	0	1	0	1	0	0	0	0	0	0	0	0	0	0	0	0	0	0	0
195	tron-01792	Paul Ryan: Women Using Birth Control Commit Murder	false	17	" "You have to understand, just like millions of Americans out there have to understand: God didn't want us to be able to have unprotected sex that wouldn't result in pregnancy.	That's why it needs to be repealed.	The other part of the reason why women shouldn't be allowed to use birth control at all is the fact that, in doing so, they're committing murder and that goes against everything this country stands for.	That's not how we were designed and every time someone uses birth control, they're effectively going against God's wishes and committing manslaughter.	It has to stop and it has to stop by any means necessary, what other signs and signals do you need?"	0	0	0	1	0	0	0	0	0	0	0	0	0	0	0	0	0	0	0	0	0	0	0	0	0	0	0	0	0	0	0	0	0	0	0	0	0	0	0	0
196	tron-01792	Paul Ryan: Women Using Birth Control Commit Murder	false	18	That's not how we were designed and every time someone uses birth control, they're effectively going against God's wishes and committing manslaughter.	The other part of the reason why women shouldn't be allowed to use birth control at all is the fact that, in doing so, they're committing murder and that goes against everything this country stands for.	" "You have to understand, just like millions of Americans out there have to understand: God didn't want us to be able to have unprotected sex that wouldn't result in pregnancy.	It has to stop and it has to stop by any means necessary, what other signs and signals do you need?"	Ryan concluded anxiously./politicono	0	0	0	1	0	0	0	1	1	0	0	0	0	0	0	0	0	0	0	0	0	0	0	0	1	0	0	0	0	0	0	0	0	0	0	0	0	0	0	0
197	tron-01792	Paul Ryan: Women Using Birth Control Commit Murder	false	19	It has to stop and it has to stop by any means necessary, what other signs and signals do you need?"	" "You have to understand, just like millions of Americans out there have to understand: God didn't want us to be able to have unprotected sex that wouldn't result in pregnancy.	That's not how we were designed and every time someone uses birth control, they're effectively going against God's wishes and committing manslaughter.	Ryan concluded anxiously./politicono		0	0	0	0	0	0	0	0	0	0	0	0	0	0	0	0	0	0	0	0	0	0	0	0	0	0	0	0	0	0	0	0	0	0	0	0	0	0	0	0
198	tron-01792	Paul Ryan: Women Using Birth Control Commit Murder	false	20	Ryan concluded anxiously./politicono	That's not how we were designed and every time someone uses birth control, they're effectively going against God's wishes and committing manslaughter.	It has to stop and it has to stop by any means necessary, what other signs and signals do you need?"			0	0	0	0	0	0	0	0	0	0	0	0	0	0	0	0	0	0	0	0	0	0	0	0	0	0	0	0	0	0	0	0	0	0	0	0	0	0	0	0
199	tron-02225	Palestinian Burn Patient Turned Suicide Bomber	true	0	I was instrumental in establishing the Israeli National Skin Bank, which is the largest in the world.			The National Skin Bank stores skin for every day needs as well as for war time or mass casualty situations.	This skin bank is hosted at the Hadassah Ein Kerem University hospital in Jerusalem where I was the chairman of plastic surgery.	1	0	0	0	0	0	0	0	0	0	0	0	0	1	0	0	0	0	0	0	0	0	0	0	0	0	0	0	0	0	0	0	0	0	0	0	0	0	0	0
200	tron-02225	Palestinian Burn Patient Turned Suicide Bomber	true	1	The National Skin Bank stores skin for every day needs as well as for war time or mass casualty situations.		I was instrumental in establishing the Israeli National Skin Bank, which is the largest in the world.	This skin bank is hosted at the Hadassah Ein Kerem University hospital in Jerusalem where I was the chairman of plastic surgery.	This is how I was asked to supply skin for an Arab woman from Gaza, who was hospitalized in Soroka Hospital in Beersheba after her family burned her.	1	0	0	0	0	0	0	0	0	0	0	0	0	1	0	0	0	0	0	0	0	0	0	0	0	0	0	0	0	0	0	0	0	0	0	0	0	0	0	0
201	tron-02225	Palestinian Burn Patient Turned Suicide Bomber	true	2	This skin bank is hosted at the Hadassah Ein Kerem University hospital in Jerusalem where I was the chairman of plastic surgery.	I was instrumental in establishing the Israeli National Skin Bank, which is the largest in the world.	The National Skin Bank stores skin for every day needs as well as for war time or mass casualty situations.	This is how I was asked to supply skin for an Arab woman from Gaza, who was hospitalized in Soroka Hospital in Beersheba after her family burned her.	Usually, such atrocities happen among Arab families when the women are suspected of having an affair.	1	0	0	0	0	0	0	0	0	0	0	0	0	1	0	0	0	0	0	0	0	0	0	0	0	0	0	0	0	0	0	0	0	0	0	0	0	0	0	0
202	tron-02225	Palestinian Burn Patient Turned Suicide Bomber	true	3	This is how I was asked to supply skin for an Arab woman from Gaza, who was hospitalized in Soroka Hospital in Beersheba after her family burned her.	The National Skin Bank stores skin for every day needs as well as for war time or mass casualty situations.	This skin bank is hosted at the Hadassah Ein Kerem University hospital in Jerusalem where I was the chairman of plastic surgery.	Usually, such atrocities happen among Arab families when the women are suspected of having an affair.	We supplied all the needed Homografts for her treatment.	1	0	0	0	0	0	0	0	0	0	0	0	0	1	0	0	0	0	0	0	0	0	0	0	0	0	0	0	0	0	0	0	0	0	0	0	0	0	0	0
203	tron-02225	Palestinian Burn Patient Turned Suicide Bomber	true	4	Usually, such atrocities happen among Arab families when the women are suspected of having an affair.	This skin bank is hosted at the Hadassah Ein Kerem University hospital in Jerusalem where I was the chairman of plastic surgery.	This is how I was asked to supply skin for an Arab woman from Gaza, who was hospitalized in Soroka Hospital in Beersheba after her family burned her.	We supplied all the needed Homografts for her treatment.	She was successfully treated by my friend and colleague Prof. Lior Rosenberg, and discharged to return to Gaza.	1	0	0	0	0	0	0	0	0	0	0	0	0	1	0	0	0	0	0	0	0	0	0	0	0	0	0	0	0	0	0	0	0	0	0	0	0	0	0	0
204	tron-02225	Palestinian Burn Patient Turned Suicide Bomber	true	5	We supplied all the needed Homografts for her treatment.	This is how I was asked to supply skin for an Arab woman from Gaza, who was hospitalized in Soroka Hospital in Beersheba after her family burned her.	Usually, such atrocities happen among Arab families when the women are suspected of having an affair.	She was successfully treated by my friend and colleague Prof. Lior Rosenberg, and discharged to return to Gaza.	She was invited for regular follow up visits to the outpatient clinic in Beersheba.	1	0	0	0	0	0	0	0	0	0	0	0	0	1	0	0	0	0	0	0	0	0	0	0	0	0	0	0	0	0	0	0	0	0	0	0	0	0	0	0
205	tron-02225	Palestinian Burn Patient Turned Suicide Bomber	true	6	She was successfully treated by my friend and colleague Prof. Lior Rosenberg, and discharged to return to Gaza.	Usually, such atrocities happen among Arab families when the women are suspected of having an affair.	We supplied all the needed Homografts for her treatment.	She was invited for regular follow up visits to the outpatient clinic in Beersheba.	One day she was caught at a border crossing wearing a suicide belt.	1	0	0	0	0	0	0	0	0	0	0	0	0	1	0	0	0	0	0	0	0	0	0	0	0	0	0	0	0	0	0	0	0	0	0	0	0	0	0	0
206	tron-02225	Palestinian Burn Patient Turned Suicide Bomber	true	7	She was invited for regular follow up visits to the outpatient clinic in Beersheba.	We supplied all the needed Homografts for her treatment.	She was successfully treated by my friend and colleague Prof. Lior Rosenberg, and discharged to return to Gaza.	One day she was caught at a border crossing wearing a suicide belt.	She meant to explode herself in the outpatient clinic of the hospital where they saved her life.	1	0	0	0	0	0	0	0	0	0	0	0	0	1	0	0	0	0	0	0	0	0	0	0	0	0	0	0	0	0	0	0	0	0	0	0	0	0	0	0
207	tron-02225	Palestinian Burn Patient Turned Suicide Bomber	true	8	One day she was caught at a border crossing wearing a suicide belt.	She was successfully treated by my friend and colleague Prof. Lior Rosenberg, and discharged to return to Gaza.	She was invited for regular follow up visits to the outpatient clinic in Beersheba.	She meant to explode herself in the outpatient clinic of the hospital where they saved her life.	It seems that her family promised her that if she did that, they would forgive her.	1	0	0	0	0	0	0	0	0	0	0	0	0	1	0	0	0	0	0	0	0	0	0	0	0	0	0	0	0	0	0	0	0	0	0	0	0	0	0	0
208	tron-02225	Palestinian Burn Patient Turned Suicide Bomber	true	9	She meant to explode herself in the outpatient clinic of the hospital where they saved her life.	She was invited for regular follow up visits to the outpatient clinic in Beersheba.	One day she was caught at a border crossing wearing a suicide belt.	It seems that her family promised her that if she did that, they would forgive her.	This is only one example of the war between Jews and Muslims in the Land of Israel.	1	0	0	0	0	0	0	0	0	0	0	0	0	1	0	0	0	0	0	0	0	0	0	0	0	0	0	0	0	0	0	0	0	0	0	0	0	0	0	0
209	tron-02225	Palestinian Burn Patient Turned Suicide Bomber	true	10	It seems that her family promised her that if she did that, they would forgive her.	One day she was caught at a border crossing wearing a suicide belt.	She meant to explode herself in the outpatient clinic of the hospital where they saved her life.	This is only one example of the war between Jews and Muslims in the Land of Israel.	It is not a territorial conflict.	1	0	0	0	0	0	0	0	0	0	0	0	0	1	0	0	0	0	0	0	0	0	0	0	0	0	0	0	0	0	0	0	0	0	0	0	0	0	0	0
210	tron-02225	Palestinian Burn Patient Turned Suicide Bomber	true	11	This is only one example of the war between Jews and Muslims in the Land of Israel.	She meant to explode herself in the outpatient clinic of the hospital where they saved her life.	It seems that her family promised her that if she did that, they would forgive her.	It is not a territorial conflict.	This is a civilizational conflict.	1	0	0	0	0	0	0	0	0	0	0	0	0	0	0	0	0	0	0	0	0	0	0	0	0	0	0	0	0	0	0	0	0	0	0	0	0	0	0	0
211	tron-02225	Palestinian Burn Patient Turned Suicide Bomber	true	12	It is not a territorial conflict.	It seems that her family promised her that if she did that, they would forgive her.	This is only one example of the war between Jews and Muslims in the Land of Israel.	This is a civilizational conflict.		0	0	0	0	0	0	0	0	0	0	0	0	0	0	0	0	0	0	0	0	0	0	0	0	0	0	0	0	0	0	0	0	0	0	0	0	0	0	0	0
212	tron-02225	Palestinian Burn Patient Turned Suicide Bomber	true	13	This is a civilizational conflict.	This is only one example of the war between Jews and Muslims in the Land of Israel.	It is not a territorial conflict.			0	0	0	0	0	0	0	0	0	0	0	0	0	0	0	0	0	0	0	0	0	0	0	0	0	0	0	0	0	0	0	0	0	0	0	0	0	0	0	0
214	tron-02256	Five-year-old Faith Hoemspine has cancer and wants all the greeting cards she can get	false	1	[Collected on the Internet, 2001] Faith is a little girl with a rare form of cancer.			She has had to have both arms and legs amputated.	This cancer will eventually take her life.	1	0	0	0	0	0	0	0	0	0	0	0	1	0	0	0	0	0	0	0	0	0	0	0	0	0	0	0	0	0	0	0	0	0	0	0	0	0	0	0
215	tron-02256	Five-year-old Faith Hoemspine has cancer and wants all the greeting cards she can get	false	2	She has had to have both arms and legs amputated.		[Collected on the Internet, 2001] Faith is a little girl with a rare form of cancer.	This cancer will eventually take her life.	Her wish is to be in the Guiness Book of World Records for getting the most get well cards.	1	0	0	0	0	0	0	0	0	0	0	0	1	0	0	0	0	0	0	0	0	0	0	0	0	0	0	0	0	0	0	0	0	0	0	0	0	0	0	0
216	tron-02256	Five-year-old Faith Hoemspine has cancer and wants all the greeting cards she can get	false	3	This cancer will eventually take her life.	[Collected on the Internet, 2001] Faith is a little girl with a rare form of cancer.	She has had to have both arms and legs amputated.	Her wish is to be in the Guiness Book of World Records for getting the most get well cards.	I believe she is 10 years old.	1	0	0	0	0	0	0	0	0	0	0	0	1	0	0	0	0	0	0	0	0	0	0	0	0	0	0	0	0	0	0	0	0	0	0	0	0	0	0	0
217	tron-02256	Five-year-old Faith Hoemspine has cancer and wants all the greeting cards she can get	false	4	Her wish is to be in the Guiness Book of World Records for getting the most get well cards.	She has had to have both arms and legs amputated.	This cancer will eventually take her life.	I believe she is 10 years old.	Please take the time to make her wish come true.	1	0	0	0	0	0	0	0	0	0	0	0	1	0	0	0	0	0	0	0	0	0	0	0	0	0	0	0	0	0	0	0	0	0	0	0	0	0	0	0
218	tron-02256	Five-year-old Faith Hoemspine has cancer and wants all the greeting cards she can get	false	5	I believe she is 10 years old.	This cancer will eventually take her life.	Her wish is to be in the Guiness Book of World Records for getting the most get well cards.	Please take the time to make her wish come true.	Faith Hoemspine c/o Shriners Hospital 3229 Burnet Avenue Cincinnati Ohio 45229-3095	1	0	0	0	0	0	0	0	0	0	0	0	1	0	0	0	0	0	0	0	0	0	0	0	0	0	0	0	0	0	0	0	0	0	0	0	0	0	0	0
219	tron-02256	Five-year-old Faith Hoemspine has cancer and wants all the greeting cards she can get	false	6	Please take the time to make her wish come true.	Her wish is to be in the Guiness Book of World Records for getting the most get well cards.	I believe she is 10 years old.	Faith Hoemspine c/o Shriners Hospital 3229 Burnet Avenue Cincinnati Ohio 45229-3095		0	0	0	0	0	0	0	0	0	0	0	1	0	0	0	0	0	0	0	0	0	0	0	0	0	0	0	0	0	0	0	0	0	0	0	0	0	0	0	0
220	tron-02256	Five-year-old Faith Hoemspine has cancer and wants all the greeting cards she can get	false	7	Faith Hoemspine c/o Shriners Hospital 3229 Burnet Avenue Cincinnati Ohio 45229-3095	I believe she is 10 years old.	Please take the time to make her wish come true.			0	0	0	0	0	0	0	0	0	0	0	0	0	0	0	0	0	0	0	0	0	0	0	0	0	0	0	0	0	0	0	0	0	0	0	0	0	0	0	0
221	tron-01368	Woman Finds Tongue-Eating Parasite in a Can of Tuna	false	0	SEE IT: British mom finds tongue-eating parasite inside can of tuna, experts say By Meg Wagner NEW YORK DAILY NEWS • Feb 06, 2015 at 11:25 am A British mom opened up a can of parasites when she tried to make tuna for dinner.			Zoe Butler found a tiny parasite inside a can of tuna - and scientists said it is likely a tongue-eating variety.	The Nottingham mom found the beady-eyed parasite tucked inside a can of Princes tuna chunks last month.	1	0	0	0	0	0	0	0	0	0	1	1	1	0	0	0	0	0	0	0	0	0	0	0	0	0	0	0	0	0	0	0	0	0	0	1	0	0	0	0
222	tron-01368	Woman Finds Tongue-Eating Parasite in a Can of Tuna	false	1	Zoe Butler found a tiny parasite inside a can of tuna - and scientists said it is likely a tongue-eating variety.		SEE IT: British mom finds tongue-eating parasite inside can of tuna, experts say By Meg Wagner NEW YORK DAILY NEWS • Feb 06, 2015 at 11:25 am A British mom opened up a can of parasites when she tried to make tuna for dinner.	The Nottingham mom found the beady-eyed parasite tucked inside a can of Princes tuna chunks last month.	She posted images of the alien-like creature on Twitter, hoping someone could identify her unwelcome dinner guest.	1	0	0	0	0	0	0	0	0	0	0	0	1	0	0	0	0	0	0	0	0	0	0	0	0	0	0	0	0	0	0	0	0	0	0	0	0	0	0	0
223	tron-01368	Woman Finds Tongue-Eating Parasite in a Can of Tuna	false	2	The Nottingham mom found the beady-eyed parasite tucked inside a can of Princes tuna chunks last month.	SEE IT: British mom finds tongue-eating parasite inside can of tuna, experts say By Meg Wagner NEW YORK DAILY NEWS • Feb 06, 2015 at 11:25 am A British mom opened up a can of parasites when she tried to make tuna for dinner.	Zoe Butler found a tiny parasite inside a can of tuna - and scientists said it is likely a tongue-eating variety.	She posted images of the alien-like creature on Twitter, hoping someone could identify her unwelcome dinner guest.	Finally, she got her answer.	1	0	0	0	0	0	0	0	0	0	0	0	1	0	0	0	0	0	0	0	0	0	0	0	0	0	0	0	0	0	0	0	0	0	0	0	0	0	0	0
224	tron-01368	Woman Finds Tongue-Eating Parasite in a Can of Tuna	false	3	She posted images of the alien-like creature on Twitter, hoping someone could identify her unwelcome dinner guest.	Zoe Butler found a tiny parasite inside a can of tuna - and scientists said it is likely a tongue-eating variety.	The Nottingham mom found the beady-eyed parasite tucked inside a can of Princes tuna chunks last month.	Finally, she got her answer.	The parasite is probably a Cymothoa exigua, also known as the tongue-eating louse, Stuart Hine from London's Natural History Museum told the Telegraph this week.	1	0	0	0	0	0	0	0	0	0	0	0	1	0	0	0	0	0	0	0	0	0	0	0	0	0	0	0	0	0	0	0	0	0	0	0	0	0	0	0
225	tron-01368	Woman Finds Tongue-Eating Parasite in a Can of Tuna	false	4	Finally, she got her answer.	The Nottingham mom found the beady-eyed parasite tucked inside a can of Princes tuna chunks last month.	She posted images of the alien-like creature on Twitter, hoping someone could identify her unwelcome dinner guest.	The parasite is probably a Cymothoa exigua, also known as the tongue-eating louse, Stuart Hine from London's Natural History Museum told the Telegraph this week.	A Cymothoa exigua enters a fish through its gills and attaches to the host's tongue.	1	0	0	0	0	0	0	0	0	0	0	0	1	0	0	0	0	0	0	0	0	0	0	0	0	0	0	0	0	0	0	0	0	0	0	0	0	0	0	0
226	tron-01368	Woman Finds Tongue-Eating Parasite in a Can of Tuna	false	5	The parasite is probably a Cymothoa exigua, also known as the tongue-eating louse, Stuart Hine from London's Natural History Museum told the Telegraph this week.	She posted images of the alien-like creature on Twitter, hoping someone could identify her unwelcome dinner guest.	Finally, she got her answer.	A Cymothoa exigua enters a fish through its gills and attaches to the host's tongue.	The parasites are not considered harmful to humans.	0	0	0	0	0	0	0	0	0	0	0	0	0	0	0	0	0	0	0	0	0	0	0	0	0	0	0	0	0	0	0	0	0	0	0	0	0	0	0	0
227	tron-01368	Woman Finds Tongue-Eating Parasite in a Can of Tuna	false	6	A Cymothoa exigua enters a fish through its gills and attaches to the host's tongue.	Finally, she got her answer.	The parasite is probably a Cymothoa exigua, also known as the tongue-eating louse, Stuart Hine from London's Natural History Museum told the Telegraph this week.	The parasites are not considered harmful to humans.	Hine hasn't inspected the parasite in person and noted that only through a thorough examination could he confirm its identity; but he said the photos suggest it is a tongue-eating louse.	0	0	0	0	0	0	0	0	0	0	0	0	0	0	0	0	0	0	0	0	0	0	0	0	0	0	0	0	0	0	0	0	0	0	0	0	0	0	0	0
228	tron-01368	Woman Finds Tongue-Eating Parasite in a Can of Tuna	false	7	The parasites are not considered harmful to humans.	The parasite is probably a Cymothoa exigua, also known as the tongue-eating louse, Stuart Hine from London's Natural History Museum told the Telegraph this week.	A Cymothoa exigua enters a fish through its gills and attaches to the host's tongue.	Hine hasn't inspected the parasite in person and noted that only through a thorough examination could he confirm its identity; but he said the photos suggest it is a tongue-eating louse.	Other experts speculated it could be a juvenile crab or a tadpole.	0	0	0	0	0	0	0	0	0	0	0	0	0	0	0	0	0	0	0	0	0	0	0	0	0	0	0	0	0	0	0	0	0	0	0	0	0	0	0	0
229	tron-01368	Woman Finds Tongue-Eating Parasite in a Can of Tuna	false	8	Hine hasn't inspected the parasite in person and noted that only through a thorough examination could he confirm its identity; but he said the photos suggest it is a tongue-eating louse.	A Cymothoa exigua enters a fish through its gills and attaches to the host's tongue.	The parasites are not considered harmful to humans.	Other experts speculated it could be a juvenile crab or a tadpole.	A spokesman for Princes said it asked Butler to send the company the parasite so it could conduct an analysis.	0	0	0	0	0	0	0	0	0	0	0	0	0	0	0	0	0	0	0	0	0	0	0	0	0	0	0	0	0	0	0	0	0	0	0	0	0	0	0	0
230	tron-01368	Woman Finds Tongue-Eating Parasite in a Can of Tuna	false	9	Other experts speculated it could be a juvenile crab or a tadpole.	The parasites are not considered harmful to humans.	Hine hasn't inspected the parasite in person and noted that only through a thorough examination could he confirm its identity; but he said the photos suggest it is a tongue-eating louse.	A spokesman for Princes said it asked Butler to send the company the parasite so it could conduct an analysis.	Butler bought the tainted can from a Nottingham grocery store last month.	0	0	0	0	0	0	0	0	0	0	0	1	0	0	0	0	0	0	0	0	0	0	0	0	0	0	0	0	0	0	0	0	0	0	0	0	0	0	1	0
231	tron-01368	Woman Finds Tongue-Eating Parasite in a Can of Tuna	false	10	A spokesman for Princes said it asked Butler to send the company the parasite so it could conduct an analysis.	Hine hasn't inspected the parasite in person and noted that only through a thorough examination could he confirm its identity; but he said the photos suggest it is a tongue-eating louse.	Other experts speculated it could be a juvenile crab or a tadpole.	Butler bought the tainted can from a Nottingham grocery store last month.	She was getting ready to serve it to her kids for dinner when she noticed the canned fish had eyes, she said.	1	0	0	0	0	0	0	0	0	0	0	1	0	0	0	0	0	0	0	0	0	0	0	0	0	0	0	0	0	0	0	0	0	0	0	0	0	0	1	0
232	tron-01368	Woman Finds Tongue-Eating Parasite in a Can of Tuna	false	11	Butler bought the tainted can from a Nottingham grocery store last month.	Other experts speculated it could be a juvenile crab or a tadpole.	A spokesman for Princes said it asked Butler to send the company the parasite so it could conduct an analysis.	She was getting ready to serve it to her kids for dinner when she noticed the canned fish had eyes, she said.	"I opened the top of the lid and saw a purply thing, a gut sack or intestine - then I turned it round and pushed it with a fork and saw it looking back at me," she told the Nottingham Post last month.	1	0	0	0	0	0	0	0	0	0	0	0	0	0	0	0	0	0	0	0	0	0	0	0	0	0	0	0	0	0	0	0	0	0	0	0	0	0	0	0
233	tron-01368	Woman Finds Tongue-Eating Parasite in a Can of Tuna	false	12	She was getting ready to serve it to her kids for dinner when she noticed the canned fish had eyes, she said.	A spokesman for Princes said it asked Butler to send the company the parasite so it could conduct an analysis.	Butler bought the tainted can from a Nottingham grocery store last month.	"I opened the top of the lid and saw a purply thing, a gut sack or intestine - then I turned it round and pushed it with a fork and saw it looking back at me," she told the Nottingham Post last month.	It was dead when she found it.	1	0	0	0	0	0	0	0	0	0	0	0	0	0	0	0	0	0	0	0	0	0	0	0	0	0	0	0	0	0	0	0	0	0	0	0	0	0	0	0
234	tron-01368	Woman Finds Tongue-Eating Parasite in a Can of Tuna	false	13	"I opened the top of the lid and saw a purply thing, a gut sack or intestine - then I turned it round and pushed it with a fork and saw it looking back at me," she told the Nottingham Post last month.	Butler bought the tainted can from a Nottingham grocery store last month.	She was getting ready to serve it to her kids for dinner when she noticed the canned fish had eyes, she said.	It was dead when she found it.	She continued: "I haven't shown it to the kids because they might get put off eating tuna.	0	0	0	0	0	0	0	0	0	0	0	0	0	0	0	0	0	0	0	0	0	0	0	0	0	0	0	0	0	0	0	0	0	0	0	0	0	0	0	0
235	tron-01368	Woman Finds Tongue-Eating Parasite in a Can of Tuna	false	14	It was dead when she found it.	She was getting ready to serve it to her kids for dinner when she noticed the canned fish had eyes, she said.	"I opened the top of the lid and saw a purply thing, a gut sack or intestine - then I turned it round and pushed it with a fork and saw it looking back at me," she told the Nottingham Post last month.	She continued: "I haven't shown it to the kids because they might get put off eating tuna.	" Butler said she's working with the tuna company, but she doesn't want any compensation - and she definitely doesn't want any free tuna.	0	0	0	0	0	0	0	0	0	0	0	0	0	0	0	0	0	0	0	0	0	0	0	0	0	0	0	0	0	0	0	0	0	0	0	0	0	0	0	0
236	tron-01368	Woman Finds Tongue-Eating Parasite in a Can of Tuna	false	15	She continued: "I haven't shown it to the kids because they might get put off eating tuna.	"I opened the top of the lid and saw a purply thing, a gut sack or intestine - then I turned it round and pushed it with a fork and saw it looking back at me," she told the Nottingham Post last month.	It was dead when she found it.	" Butler said she's working with the tuna company, but she doesn't want any compensation - and she definitely doesn't want any free tuna.	"I just want to find out what it is and to make sure it doesn't happen to somebody else," she told the British newspaper.	0	0	0	0	0	0	0	0	0	0	0	0	0	0	0	0	0	0	0	0	0	0	0	0	0	0	0	0	0	0	0	0	0	0	0	0	0	0	0	0
237	tron-01368	Woman Finds Tongue-Eating Parasite in a Can of Tuna	false	16	" Butler said she's working with the tuna company, but she doesn't want any compensation - and she definitely doesn't want any free tuna.	It was dead when she found it.	She continued: "I haven't shown it to the kids because they might get put off eating tuna.	"I just want to find out what it is and to make sure it doesn't happen to somebody else," she told the British newspaper.		0	0	0	0	0	0	0	0	0	0	0	0	0	0	0	0	0	0	0	0	0	0	0	0	0	0	0	0	0	0	0	0	0	0	0	0	0	0	0	0
238	tron-01368	Woman Finds Tongue-Eating Parasite in a Can of Tuna	false	17	"I just want to find out what it is and to make sure it doesn't happen to somebody else," she told the British newspaper.	She continued: "I haven't shown it to the kids because they might get put off eating tuna.	" Butler said she's working with the tuna company, but she doesn't want any compensation - and she definitely doesn't want any free tuna.			0	0	0	0	0	0	0	0	0	0	0	0	0	0	0	0	0	0	0	0	0	0	0	0	0	0	0	0	0	0	0	0	0	0	0	0	0	0	0	0
239	snes-01314	After shaving her legs, a woman developed a life-threatening skin infection that required the removal of massive amounts of skin and muscle tissue.	true	0	Mother-of-three, 44, develops deadly infection and nearly loses her legs after trimming her PUBIC HAIR with a brand new razor By STEPHEN MATTHEWS FOR MAILONLINE PUBLISHED: 04:14 EST, 26 April 2017 | UPDATED: 23:18 EST, 26 April 2017			A mother-of-three has spoken of her terror after she almost lost her legs to a deadly infection which she caught from shaving her bikini line.	Dana Sedgewick, 44, from Sheffield, trimmed her pubic area with a brand new razor but ended up cutting a spot on her groin.	0	0	0	0	0	0	0	0	0	0	1	0	0	0	0	0	0	0	0	0	0	0	0	0	0	0	0	0	0	0	0	0	0	1	0	0	0	0	0	0
240	snes-01314	After shaving her legs, a woman developed a life-threatening skin infection that required the removal of massive amounts of skin and muscle tissue.	true	1	A mother-of-three has spoken of her terror after she almost lost her legs to a deadly infection which she caught from shaving her bikini line.		Mother-of-three, 44, develops deadly infection and nearly loses her legs after trimming her PUBIC HAIR with a brand new razor By STEPHEN MATTHEWS FOR MAILONLINE PUBLISHED: 04:14 EST, 26 April 2017 | UPDATED: 23:18 EST, 26 April 2017	Dana Sedgewick, 44, from Sheffield, trimmed her pubic area with a brand new razor but ended up cutting a spot on her groin.	Her body almost immediately went into shock, causing a red rash on her legs before they turned black from necrotising fasciitis - a flesh-eating infection.	1	0	0	0	0	0	0	0	0	0	0	0	0	1	0	0	0	0	0	0	0	0	0	0	0	0	0	0	0	0	0	0	0	0	0	0	0	0	0	0
241	snes-01314	After shaving her legs, a woman developed a life-threatening skin infection that required the removal of massive amounts of skin and muscle tissue.	true	2	Dana Sedgewick, 44, from Sheffield, trimmed her pubic area with a brand new razor but ended up cutting a spot on her groin.	Mother-of-three, 44, develops deadly infection and nearly loses her legs after trimming her PUBIC HAIR with a brand new razor By STEPHEN MATTHEWS FOR MAILONLINE PUBLISHED: 04:14 EST, 26 April 2017 | UPDATED: 23:18 EST, 26 April 2017	A mother-of-three has spoken of her terror after she almost lost her legs to a deadly infection which she caught from shaving her bikini line.	Her body almost immediately went into shock, causing a red rash on her legs before they turned black from necrotising fasciitis - a flesh-eating infection.	Rushed to intensive care, doctors operated to remove as much of the rotting skin as they could - but she developed sepsis during the procedure.	1	0	0	0	0	0	0	0	0	0	0	0	0	1	0	0	0	0	0	0	0	0	0	0	0	0	0	0	0	0	0	0	0	0	0	0	0	0	0	0
242	snes-01314	After shaving her legs, a woman developed a life-threatening skin infection that required the removal of massive amounts of skin and muscle tissue.	true	3	Her body almost immediately went into shock, causing a red rash on her legs before they turned black from necrotising fasciitis - a flesh-eating infection.	A mother-of-three has spoken of her terror after she almost lost her legs to a deadly infection which she caught from shaving her bikini line.	Dana Sedgewick, 44, from Sheffield, trimmed her pubic area with a brand new razor but ended up cutting a spot on her groin.	Rushed to intensive care, doctors operated to remove as much of the rotting skin as they could - but she developed sepsis during the procedure.	She was placed in a coma as her family were told she had just a 30 per cent chance of survival as her kidneys failed and her heart stopped four times.	1	0	0	0	0	0	0	0	0	0	0	0	0	1	0	0	0	0	0	0	0	0	0	0	0	0	0	0	0	0	0	0	0	0	0	0	0	0	0	0
243	snes-01314	After shaving her legs, a woman developed a life-threatening skin infection that required the removal of massive amounts of skin and muscle tissue.	true	4	Rushed to intensive care, doctors operated to remove as much of the rotting skin as they could - but she developed sepsis during the procedure.	Dana Sedgewick, 44, from Sheffield, trimmed her pubic area with a brand new razor but ended up cutting a spot on her groin.	Her body almost immediately went into shock, causing a red rash on her legs before they turned black from necrotising fasciitis - a flesh-eating infection.	She was placed in a coma as her family were told she had just a 30 per cent chance of survival as her kidneys failed and her heart stopped four times.	Having managed to survive the horrific ordeal, she underwent 21 operations to repair the damage to her skin - but doctors warned she would never walk again.	1	0	0	0	0	0	0	0	0	0	0	0	0	1	0	0	0	0	0	0	0	0	0	0	0	0	0	0	0	0	0	0	0	0	0	0	0	0	0	0
244	snes-01314	After shaving her legs, a woman developed a life-threatening skin infection that required the removal of massive amounts of skin and muscle tissue.	true	5	She was placed in a coma as her family were told she had just a 30 per cent chance of survival as her kidneys failed and her heart stopped four times.	Her body almost immediately went into shock, causing a red rash on her legs before they turned black from necrotising fasciitis - a flesh-eating infection.	Rushed to intensive care, doctors operated to remove as much of the rotting skin as they could - but she developed sepsis during the procedure.	Having managed to survive the horrific ordeal, she underwent 21 operations to repair the damage to her skin - but doctors warned she would never walk again.	But with the support of her husband, Mathew, 47, she has now recovered and can walk using crutches and is back at home with her children - Megan, 18, Freya, 14, and Klara, nine.	1	0	0	0	0	0	0	0	0	0	0	0	0	1	0	0	0	0	0	0	0	0	0	0	0	0	0	0	0	0	0	0	0	0	0	0	0	0	0	0
245	snes-01314	After shaving her legs, a woman developed a life-threatening skin infection that required the removal of massive amounts of skin and muscle tissue.	true	6	Having managed to survive the horrific ordeal, she underwent 21 operations to repair the damage to her skin - but doctors warned she would never walk again.	Rushed to intensive care, doctors operated to remove as much of the rotting skin as they could - but she developed sepsis during the procedure.	She was placed in a coma as her family were told she had just a 30 per cent chance of survival as her kidneys failed and her heart stopped four times.	But with the support of her husband, Mathew, 47, she has now recovered and can walk using crutches and is back at home with her children - Megan, 18, Freya, 14, and Klara, nine.	Mrs Sedgewick said: 'Like a lot of women, I tried to keep a tidy bikini line.	1	0	0	0	0	0	0	0	0	0	0	0	0	1	0	0	0	0	0	0	0	0	0	0	0	0	0	0	0	0	0	0	0	0	0	0	0	0	0	0
246	snes-01314	After shaving her legs, a woman developed a life-threatening skin infection that required the removal of massive amounts of skin and muscle tissue.	true	7	But with the support of her husband, Mathew, 47, she has now recovered and can walk using crutches and is back at home with her children - Megan, 18, Freya, 14, and Klara, nine.	She was placed in a coma as her family were told she had just a 30 per cent chance of survival as her kidneys failed and her heart stopped four times.	Having managed to survive the horrific ordeal, she underwent 21 operations to repair the damage to her skin - but doctors warned she would never walk again.	Mrs Sedgewick said: 'Like a lot of women, I tried to keep a tidy bikini line.	So I had a quick trim with a new razor.	1	0	0	0	0	0	0	0	0	0	0	0	0	1	0	0	0	0	0	0	0	0	0	0	0	0	0	0	0	0	0	0	0	0	0	0	0	0	0	0
247	snes-01314	After shaving her legs, a woman developed a life-threatening skin infection that required the removal of massive amounts of skin and muscle tissue.	true	8	Mrs Sedgewick said: 'Like a lot of women, I tried to keep a tidy bikini line.	Having managed to survive the horrific ordeal, she underwent 21 operations to repair the damage to her skin - but doctors warned she would never walk again.	But with the support of her husband, Mathew, 47, she has now recovered and can walk using crutches and is back at home with her children - Megan, 18, Freya, 14, and Klara, nine.	So I had a quick trim with a new razor.	'But over the weekend, I felt unwell and noticed a little pimple on my groin which kept bleeding.	0	0	0	0	0	0	0	0	0	0	0	0	0	0	0	0	0	0	0	0	0	0	0	0	0	0	0	0	0	0	0	0	0	0	0	0	0	0	0	0
248	snes-01314	After shaving her legs, a woman developed a life-threatening skin infection that required the removal of massive amounts of skin and muscle tissue.	true	9	So I had a quick trim with a new razor.	But with the support of her husband, Mathew, 47, she has now recovered and can walk using crutches and is back at home with her children - Megan, 18, Freya, 14, and Klara, nine.	Mrs Sedgewick said: 'Like a lot of women, I tried to keep a tidy bikini line.	'But over the weekend, I felt unwell and noticed a little pimple on my groin which kept bleeding.	I didn't think anything of it as I often got a rash from shaving.	0	0	0	0	0	0	0	0	0	0	0	0	0	0	0	0	0	0	0	0	0	0	0	0	0	0	0	0	0	0	0	0	0	0	0	0	0	0	0	0
249	snes-01314	After shaving her legs, a woman developed a life-threatening skin infection that required the removal of massive amounts of skin and muscle tissue.	true	10	'But over the weekend, I felt unwell and noticed a little pimple on my groin which kept bleeding.	Mrs Sedgewick said: 'Like a lot of women, I tried to keep a tidy bikini line.	So I had a quick trim with a new razor.	I didn't think anything of it as I often got a rash from shaving.	'Little did I know that this tiny pimple would almost cost me my life.	0	0	0	0	0	0	0	0	0	0	0	0	0	0	0	0	0	0	0	0	0	0	0	0	0	0	0	0	0	0	0	0	0	0	0	0	0	0	0	0
250	snes-01314	After shaving her legs, a woman developed a life-threatening skin infection that required the removal of massive amounts of skin and muscle tissue.	true	11	I didn't think anything of it as I often got a rash from shaving.	So I had a quick trim with a new razor.	'But over the weekend, I felt unwell and noticed a little pimple on my groin which kept bleeding.	'Little did I know that this tiny pimple would almost cost me my life.	'	0	0	0	0	0	0	0	0	0	0	0	0	0	0	0	0	0	0	0	0	0	0	0	0	0	0	0	0	0	0	0	0	0	0	0	0	0	0	0	0
251	snes-01314	After shaving her legs, a woman developed a life-threatening skin infection that required the removal of massive amounts of skin and muscle tissue.	true	12	'Little did I know that this tiny pimple would almost cost me my life.	'But over the weekend, I felt unwell and noticed a little pimple on my groin which kept bleeding.	I didn't think anything of it as I often got a rash from shaving.	'	Mrs Sedgewick's ordeal began in May 2012.	0	0	0	0	0	0	0	0	0	0	0	0	0	0	0	0	0	0	0	0	0	0	0	0	0	0	0	0	0	0	0	0	0	0	0	0	0	0	0	0
252	snes-01314	After shaving her legs, a woman developed a life-threatening skin infection that required the removal of massive amounts of skin and muscle tissue.	true	13	'	I didn't think anything of it as I often got a rash from shaving.	'Little did I know that this tiny pimple would almost cost me my life.	Mrs Sedgewick's ordeal began in May 2012.	Two days after she'd shaved, she began experiencing dizziness and nausea.	1	0	0	0	0	0	0	0	0	0	0	0	0	1	0	0	0	0	0	0	0	0	0	0	0	0	0	0	0	0	0	0	0	0	0	0	0	0	0	0
253	snes-01314	After shaving her legs, a woman developed a life-threatening skin infection that required the removal of massive amounts of skin and muscle tissue.	true	14	Mrs Sedgewick's ordeal began in May 2012.	'Little did I know that this tiny pimple would almost cost me my life.	'	Two days after she'd shaved, she began experiencing dizziness and nausea.	She visited her GP, who took swabs of the area and prescribed her antibiotics to combat a suspected infection.	1	0	0	0	0	0	0	0	0	0	0	0	0	1	0	0	0	0	0	0	0	0	0	0	0	0	0	0	0	0	0	0	0	0	0	0	0	0	0	0
254	snes-01314	After shaving her legs, a woman developed a life-threatening skin infection that required the removal of massive amounts of skin and muscle tissue.	true	15	Two days after she'd shaved, she began experiencing dizziness and nausea.	'	Mrs Sedgewick's ordeal began in May 2012.	She visited her GP, who took swabs of the area and prescribed her antibiotics to combat a suspected infection.	Later that day, her eldest daughter Megan discovered her lying in bed, with her legs covered in a bloody red rash.	1	0	0	0	0	0	0	0	0	0	0	0	0	1	0	0	0	0	0	0	0	0	0	0	0	0	0	0	0	0	0	0	0	0	0	0	0	0	0	0
255	snes-01314	After shaving her legs, a woman developed a life-threatening skin infection that required the removal of massive amounts of skin and muscle tissue.	true	16	She visited her GP, who took swabs of the area and prescribed her antibiotics to combat a suspected infection.	Mrs Sedgewick's ordeal began in May 2012.	Two days after she'd shaved, she began experiencing dizziness and nausea.	Later that day, her eldest daughter Megan discovered her lying in bed, with her legs covered in a bloody red rash.	Afterwards, her GP called to say that the swabs had revealed it was serious and that she needed to go in for another examination.	1	0	0	0	0	0	0	0	0	0	0	0	0	1	0	0	0	0	0	0	0	0	0	0	0	0	0	0	0	0	0	0	0	0	0	0	0	0	0	0
256	snes-01314	After shaving her legs, a woman developed a life-threatening skin infection that required the removal of massive amounts of skin and muscle tissue.	true	17	Later that day, her eldest daughter Megan discovered her lying in bed, with her legs covered in a bloody red rash.	Two days after she'd shaved, she began experiencing dizziness and nausea.	She visited her GP, who took swabs of the area and prescribed her antibiotics to combat a suspected infection.	Afterwards, her GP called to say that the swabs had revealed it was serious and that she needed to go in for another examination.	But when her husband dropped her off at the surgery, she collapsed.	1	0	0	0	0	0	0	0	0	0	0	0	0	1	0	0	0	0	0	0	0	0	0	0	0	0	0	0	0	0	0	0	0	0	0	0	0	0	0	0
257	snes-01314	After shaving her legs, a woman developed a life-threatening skin infection that required the removal of massive amounts of skin and muscle tissue.	true	18	Afterwards, her GP called to say that the swabs had revealed it was serious and that she needed to go in for another examination.	She visited her GP, who took swabs of the area and prescribed her antibiotics to combat a suspected infection.	Later that day, her eldest daughter Megan discovered her lying in bed, with her legs covered in a bloody red rash.	But when her husband dropped her off at the surgery, she collapsed.	An ambulance was called and she was rushed to the trauma unit at the Northern General Hospital in Sheffield, where doctors diagnosed her with necrotising fasciitis.	1	0	0	0	0	0	0	0	0	0	0	0	0	1	0	0	0	0	0	0	0	0	0	0	0	0	0	0	0	0	0	0	0	0	0	0	0	0	0	0
258	snes-01314	After shaving her legs, a woman developed a life-threatening skin infection that required the removal of massive amounts of skin and muscle tissue.	true	19	But when her husband dropped her off at the surgery, she collapsed.	Later that day, her eldest daughter Megan discovered her lying in bed, with her legs covered in a bloody red rash.	Afterwards, her GP called to say that the swabs had revealed it was serious and that she needed to go in for another examination.	An ambulance was called and she was rushed to the trauma unit at the Northern General Hospital in Sheffield, where doctors diagnosed her with necrotising fasciitis.	The condition causes bacteria to release toxins that attack the surrounding soft tissue, and can be caused by a minor cut or scratch.	1	0	0	0	0	0	0	0	0	0	0	0	0	1	0	0	0	0	0	0	0	0	0	0	0	0	0	0	0	0	0	0	0	0	0	0	0	0	0	0
259	snes-01314	After shaving her legs, a woman developed a life-threatening skin infection that required the removal of massive amounts of skin and muscle tissue.	true	20	An ambulance was called and she was rushed to the trauma unit at the Northern General Hospital in Sheffield, where doctors diagnosed her with necrotising fasciitis.	Afterwards, her GP called to say that the swabs had revealed it was serious and that she needed to go in for another examination.	But when her husband dropped her off at the surgery, she collapsed.	The condition causes bacteria to release toxins that attack the surrounding soft tissue, and can be caused by a minor cut or scratch.	Mrs Sedgewick said: 'By the time I got to the hospital, my legs were covered in black, rotting flesh.	1	0	0	0	0	0	0	0	0	0	0	0	0	1	0	0	0	0	0	0	0	0	0	0	0	0	0	0	0	0	0	0	0	0	0	0	0	0	0	0
260	snes-01314	After shaving her legs, a woman developed a life-threatening skin infection that required the removal of massive amounts of skin and muscle tissue.	true	21	The condition causes bacteria to release toxins that attack the surrounding soft tissue, and can be caused by a minor cut or scratch.	But when her husband dropped her off at the surgery, she collapsed.	An ambulance was called and she was rushed to the trauma unit at the Northern General Hospital in Sheffield, where doctors diagnosed her with necrotising fasciitis.	Mrs Sedgewick said: 'By the time I got to the hospital, my legs were covered in black, rotting flesh.	It was touch-and-go as to whether I'd make it.'	0	0	0	0	0	0	0	0	0	0	0	0	0	0	0	0	0	0	0	0	0	0	0	0	0	0	0	0	0	0	0	0	0	0	0	0	0	0	0	0
261	snes-01314	After shaving her legs, a woman developed a life-threatening skin infection that required the removal of massive amounts of skin and muscle tissue.	true	22	Mrs Sedgewick said: 'By the time I got to the hospital, my legs were covered in black, rotting flesh.	An ambulance was called and she was rushed to the trauma unit at the Northern General Hospital in Sheffield, where doctors diagnosed her with necrotising fasciitis.	The condition causes bacteria to release toxins that attack the surrounding soft tissue, and can be caused by a minor cut or scratch.	It was touch-and-go as to whether I'd make it.'	Over the next ten hours, surgeons battled to save her legs.	0	0	0	0	0	0	0	0	0	0	0	0	0	0	0	0	0	0	0	0	0	0	0	0	0	0	0	0	0	0	0	0	0	0	0	0	0	0	0	0
262	snes-01314	After shaving her legs, a woman developed a life-threatening skin infection that required the removal of massive amounts of skin and muscle tissue.	true	23	It was touch-and-go as to whether I'd make it.'	The condition causes bacteria to release toxins that attack the surrounding soft tissue, and can be caused by a minor cut or scratch.	Mrs Sedgewick said: 'By the time I got to the hospital, my legs were covered in black, rotting flesh.	Over the next ten hours, surgeons battled to save her legs.	Cutting through seven inches of infected skin, they removed the diseased flesh and reapplied skin from her back.	0	0	0	0	0	0	0	0	0	0	0	0	0	0	0	0	0	0	0	0	0	0	0	0	0	0	0	0	0	0	0	0	0	0	0	0	0	0	0	0
263	snes-01314	After shaving her legs, a woman developed a life-threatening skin infection that required the removal of massive amounts of skin and muscle tissue.	true	24	Over the next ten hours, surgeons battled to save her legs.	Mrs Sedgewick said: 'By the time I got to the hospital, my legs were covered in black, rotting flesh.	It was touch-and-go as to whether I'd make it.'	Cutting through seven inches of infected skin, they removed the diseased flesh and reapplied skin from her back.	During surgery, she developed sepsis and was given a slim chance of survival after going into septic shock.	0	0	0	0	0	0	0	0	0	0	0	0	0	0	0	0	0	0	0	0	0	0	0	0	0	0	0	0	0	0	0	0	0	0	0	0	0	0	0	0
264	snes-01314	After shaving her legs, a woman developed a life-threatening skin infection that required the removal of massive amounts of skin and muscle tissue.	true	25	Cutting through seven inches of infected skin, they removed the diseased flesh and reapplied skin from her back.	It was touch-and-go as to whether I'd make it.'	Over the next ten hours, surgeons battled to save her legs.	During surgery, she developed sepsis and was given a slim chance of survival after going into septic shock.	The 'silent killer' strikes when an infection such as blood poisoning sparks a violent immune response in which the body attacks its own organs.	0	0	0	0	0	0	0	0	0	0	0	0	0	0	0	0	0	0	0	0	0	0	0	0	0	0	0	0	0	0	0	0	0	0	0	0	0	0	0	0
265	snes-01314	After shaving her legs, a woman developed a life-threatening skin infection that required the removal of massive amounts of skin and muscle tissue.	true	26	During surgery, she developed sepsis and was given a slim chance of survival after going into septic shock.	Over the next ten hours, surgeons battled to save her legs.	Cutting through seven inches of infected skin, they removed the diseased flesh and reapplied skin from her back.	The 'silent killer' strikes when an infection such as blood poisoning sparks a violent immune response in which the body attacks its own organs.	To increase her chances of survival, doctors decided to put her into an induced coma for nine days.	0	0	0	0	0	0	0	0	0	1	0	0	0	0	0	0	0	0	0	0	0	0	0	0	0	0	0	0	0	1	0	0	0	0	0	0	0	0	0	0
266	snes-01314	After shaving her legs, a woman developed a life-threatening skin infection that required the removal of massive amounts of skin and muscle tissue.	true	27	The 'silent killer' strikes when an infection such as blood poisoning sparks a violent immune response in which the body attacks its own organs.	Cutting through seven inches of infected skin, they removed the diseased flesh and reapplied skin from her back.	During surgery, she developed sepsis and was given a slim chance of survival after going into septic shock.	To increase her chances of survival, doctors decided to put her into an induced coma for nine days.	She said: 'When I woke up, my legs were covered in bandages and I had no idea what had happened.	0	0	0	0	0	0	0	0	0	1	0	0	0	0	0	0	0	0	0	0	0	0	0	0	0	0	0	0	0	1	0	0	0	0	0	0	0	0	0	0
267	snes-01314	After shaving her legs, a woman developed a life-threatening skin infection that required the removal of massive amounts of skin and muscle tissue.	true	28	To increase her chances of survival, doctors decided to put her into an induced coma for nine days.	During surgery, she developed sepsis and was given a slim chance of survival after going into septic shock.	The 'silent killer' strikes when an infection such as blood poisoning sparks a violent immune response in which the body attacks its own organs.	She said: 'When I woke up, my legs were covered in bandages and I had no idea what had happened.	I thought I'd been in a car accident.	0	0	0	0	0	0	0	0	0	0	0	0	0	0	0	0	0	0	0	0	0	0	0	0	0	0	0	0	0	0	0	0	0	0	0	0	0	0	0	0
268	snes-01314	After shaving her legs, a woman developed a life-threatening skin infection that required the removal of massive amounts of skin and muscle tissue.	true	29	She said: 'When I woke up, my legs were covered in bandages and I had no idea what had happened.	The 'silent killer' strikes when an infection such as blood poisoning sparks a violent immune response in which the body attacks its own organs.	To increase her chances of survival, doctors decided to put her into an induced coma for nine days.	I thought I'd been in a car accident.	'But when the surgeon asked me if I remembered shaving, I suddenly recalled trimming my bikini line.	0	0	0	0	0	0	0	0	0	0	0	0	0	0	0	0	0	0	0	0	0	0	0	0	0	0	0	0	0	0	0	0	0	0	0	0	0	0	0	0
269	snes-01314	After shaving her legs, a woman developed a life-threatening skin infection that required the removal of massive amounts of skin and muscle tissue.	true	30	I thought I'd been in a car accident.	To increase her chances of survival, doctors decided to put her into an induced coma for nine days.	She said: 'When I woke up, my legs were covered in bandages and I had no idea what had happened.	'But when the surgeon asked me if I remembered shaving, I suddenly recalled trimming my bikini line.	'He told me that the spot on my groin had become infected, and I'd been very lucky to survive.'	0	0	0	0	0	0	0	0	0	0	0	0	0	0	0	0	0	0	0	0	0	0	0	0	0	0	0	0	0	0	0	0	0	0	0	0	0	0	0	0
270	snes-01314	After shaving her legs, a woman developed a life-threatening skin infection that required the removal of massive amounts of skin and muscle tissue.	true	31	'But when the surgeon asked me if I remembered shaving, I suddenly recalled trimming my bikini line.	She said: 'When I woke up, my legs were covered in bandages and I had no idea what had happened.	I thought I'd been in a car accident.	'He told me that the spot on my groin had become infected, and I'd been very lucky to survive.'	Mrs Sedgewick was transferred to the hospital's burns unit for specialist treatment, and was able to see her legs for the first time.	0	0	0	0	0	0	0	0	0	0	0	0	0	0	0	0	0	0	0	0	0	0	0	0	0	0	0	0	0	0	0	0	0	0	0	0	0	0	0	0
271	snes-01314	After shaving her legs, a woman developed a life-threatening skin infection that required the removal of massive amounts of skin and muscle tissue.	true	32	'He told me that the spot on my groin had become infected, and I'd been very lucky to survive.'	I thought I'd been in a car accident.	'But when the surgeon asked me if I remembered shaving, I suddenly recalled trimming my bikini line.	Mrs Sedgewick was transferred to the hospital's burns unit for specialist treatment, and was able to see her legs for the first time.	She said: 'It was horrific.	0	0	0	0	0	0	0	0	0	0	0	0	0	0	0	0	0	0	0	0	0	0	0	0	0	0	0	0	0	0	0	0	0	0	0	0	0	0	0	0
272	snes-01314	After shaving her legs, a woman developed a life-threatening skin infection that required the removal of massive amounts of skin and muscle tissue.	true	33	Mrs Sedgewick was transferred to the hospital's burns unit for specialist treatment, and was able to see her legs for the first time.	'But when the surgeon asked me if I remembered shaving, I suddenly recalled trimming my bikini line.	'He told me that the spot on my groin had become infected, and I'd been very lucky to survive.'	She said: 'It was horrific.	All of my muscle had rotted away, and I had a crater of skin near my groin.	0	0	0	0	0	0	0	0	0	0	0	0	0	0	0	0	0	0	0	0	0	0	0	0	0	0	0	0	0	0	0	0	0	0	0	0	0	0	0	0
273	snes-01314	After shaving her legs, a woman developed a life-threatening skin infection that required the removal of massive amounts of skin and muscle tissue.	true	34	She said: 'It was horrific.	'He told me that the spot on my groin had become infected, and I'd been very lucky to survive.'	Mrs Sedgewick was transferred to the hospital's burns unit for specialist treatment, and was able to see her legs for the first time.	All of my muscle had rotted away, and I had a crater of skin near my groin.	I felt like I was going to throw up.	0	0	0	0	0	0	0	0	0	0	0	0	0	0	0	0	0	0	0	0	0	0	0	0	0	0	0	0	0	0	0	0	0	0	0	0	0	0	0	0
274	snes-01314	After shaving her legs, a woman developed a life-threatening skin infection that required the removal of massive amounts of skin and muscle tissue.	true	35	All of my muscle had rotted away, and I had a crater of skin near my groin.	Mrs Sedgewick was transferred to the hospital's burns unit for specialist treatment, and was able to see her legs for the first time.	She said: 'It was horrific.	I felt like I was going to throw up.	'But I knew that it could have been much, much worse.	0	0	0	0	0	0	0	0	0	0	0	0	0	0	0	0	0	0	0	0	0	0	0	0	0	0	0	0	0	0	0	0	0	0	0	0	0	0	0	0
275	snes-01314	After shaving her legs, a woman developed a life-threatening skin infection that required the removal of massive amounts of skin and muscle tissue.	true	36	I felt like I was going to throw up.	She said: 'It was horrific.	All of my muscle had rotted away, and I had a crater of skin near my groin.	'But I knew that it could have been much, much worse.	I could easily have lost my legs - or worse, died.	0	0	0	0	0	0	0	0	0	0	0	0	0	0	0	0	0	0	0	0	0	0	0	0	0	0	0	0	0	0	0	0	0	0	0	0	0	0	0	0
276	snes-01314	After shaving her legs, a woman developed a life-threatening skin infection that required the removal of massive amounts of skin and muscle tissue.	true	37	'But I knew that it could have been much, much worse.	All of my muscle had rotted away, and I had a crater of skin near my groin.	I felt like I was going to throw up.	I could easily have lost my legs - or worse, died.	'	0	0	0	0	0	0	0	0	0	0	0	0	0	0	0	0	0	0	0	0	0	0	0	0	0	0	0	0	0	0	0	0	0	0	0	0	0	0	0	0
277	snes-01314	After shaving her legs, a woman developed a life-threatening skin infection that required the removal of massive amounts of skin and muscle tissue.	true	38	I could easily have lost my legs - or worse, died.	I felt like I was going to throw up.	'But I knew that it could have been much, much worse.	'	Doctors warned that she'd never walk again but she defied them and managed to walk on crutches, after intense physiotherapy.	0	0	0	0	0	0	0	0	0	0	0	0	0	0	0	0	0	0	0	0	0	0	0	0	0	0	0	0	0	0	0	0	0	0	0	0	0	0	0	0
278	snes-01314	After shaving her legs, a woman developed a life-threatening skin infection that required the removal of massive amounts of skin and muscle tissue.	true	39	'	'But I knew that it could have been much, much worse.	I could easily have lost my legs - or worse, died.	Doctors warned that she'd never walk again but she defied them and managed to walk on crutches, after intense physiotherapy.	Six weeks later, she was discharged from hospital.	0	0	0	0	0	0	0	0	0	0	0	0	0	0	0	0	0	0	0	0	0	0	0	0	0	0	0	0	0	0	0	0	0	0	0	0	0	0	0	0
279	snes-01314	After shaving her legs, a woman developed a life-threatening skin infection that required the removal of massive amounts of skin and muscle tissue.	true	40	Doctors warned that she'd never walk again but she defied them and managed to walk on crutches, after intense physiotherapy.	I could easily have lost my legs - or worse, died.	'	Six weeks later, she was discharged from hospital.	Over the next four years, she underwent 21 operations to improve the appearance of her skin.	0	0	0	0	0	0	0	0	0	0	0	0	0	0	0	0	0	0	0	0	0	0	0	0	0	0	0	0	0	0	0	0	0	0	0	0	0	0	0	0
280	snes-01314	After shaving her legs, a woman developed a life-threatening skin infection that required the removal of massive amounts of skin and muscle tissue.	true	41	Six weeks later, she was discharged from hospital.	'	Doctors warned that she'd never walk again but she defied them and managed to walk on crutches, after intense physiotherapy.	Over the next four years, she underwent 21 operations to improve the appearance of her skin.	Mrs Sedgewick, who has been left with extensive scarring, said: 'It didn't feel like my own body any more.	0	0	0	0	0	0	0	0	0	0	0	0	0	0	0	0	0	0	0	0	0	0	0	0	0	0	0	0	0	0	0	0	0	0	0	0	0	0	0	0
281	snes-01314	After shaving her legs, a woman developed a life-threatening skin infection that required the removal of massive amounts of skin and muscle tissue.	true	42	Over the next four years, she underwent 21 operations to improve the appearance of her skin.	Doctors warned that she'd never walk again but she defied them and managed to walk on crutches, after intense physiotherapy.	Six weeks later, she was discharged from hospital.	Mrs Sedgewick, who has been left with extensive scarring, said: 'It didn't feel like my own body any more.	'But with Mat's support, I grew to see the scars as a reminder of how brave I'd been, and how lucky I was to survive.	0	0	0	0	0	0	0	0	0	0	0	0	0	0	0	0	0	0	0	0	0	0	0	0	0	0	0	0	0	0	0	0	0	0	0	0	0	0	0	0
282	snes-01314	After shaving her legs, a woman developed a life-threatening skin infection that required the removal of massive amounts of skin and muscle tissue.	true	43	Mrs Sedgewick, who has been left with extensive scarring, said: 'It didn't feel like my own body any more.	Six weeks later, she was discharged from hospital.	Over the next four years, she underwent 21 operations to improve the appearance of her skin.	'But with Mat's support, I grew to see the scars as a reminder of how brave I'd been, and how lucky I was to survive.	'It's incredible to think a tiny shaving spot could have killed me.	0	0	0	0	0	0	0	0	0	0	0	0	0	0	0	0	0	0	0	0	0	0	0	0	0	0	0	0	0	0	0	0	0	0	0	0	0	0	0	0
283	snes-01314	After shaving her legs, a woman developed a life-threatening skin infection that required the removal of massive amounts of skin and muscle tissue.	true	44	'But with Mat's support, I grew to see the scars as a reminder of how brave I'd been, and how lucky I was to survive.	Over the next four years, she underwent 21 operations to improve the appearance of her skin.	Mrs Sedgewick, who has been left with extensive scarring, said: 'It didn't feel like my own body any more.	'It's incredible to think a tiny shaving spot could have killed me.	I had a very close shave indeed.	0	0	0	0	0	0	0	0	0	0	0	0	0	0	0	0	0	0	0	0	0	0	0	0	0	0	0	0	0	0	0	0	0	0	0	0	0	0	0	0
284	snes-01314	After shaving her legs, a woman developed a life-threatening skin infection that required the removal of massive amounts of skin and muscle tissue.	true	45	'It's incredible to think a tiny shaving spot could have killed me.	Mrs Sedgewick, who has been left with extensive scarring, said: 'It didn't feel like my own body any more.	'But with Mat's support, I grew to see the scars as a reminder of how brave I'd been, and how lucky I was to survive.	I had a very close shave indeed.	'	0	0	0	0	0	0	0	0	0	0	0	0	0	0	0	0	0	0	0	0	0	0	0	0	0	0	0	0	0	0	0	0	0	0	0	0	0	0	0	0
285	snes-01314	After shaving her legs, a woman developed a life-threatening skin infection that required the removal of massive amounts of skin and muscle tissue.	true	46	I had a very close shave indeed.	'But with Mat's support, I grew to see the scars as a reminder of how brave I'd been, and how lucky I was to survive.	'It's incredible to think a tiny shaving spot could have killed me.	'	Dr Ron Daniels BEM, chief executive of the UK Sepsis Trust, said: 'Stories like Dana's illustrate the serious damage sepsis can do.	0	0	0	0	0	0	0	0	0	0	0	0	0	0	0	0	0	0	0	0	0	0	0	0	0	0	0	0	0	0	0	0	0	0	0	0	0	0	0	0
286	snes-01314	After shaving her legs, a woman developed a life-threatening skin infection that required the removal of massive amounts of skin and muscle tissue.	true	47	'	'It's incredible to think a tiny shaving spot could have killed me.	I had a very close shave indeed.	Dr Ron Daniels BEM, chief executive of the UK Sepsis Trust, said: 'Stories like Dana's illustrate the serious damage sepsis can do.	Every day in the UK, individuals and families have their lives torn apart by the condition.	0	0	0	0	0	0	0	0	0	0	0	1	0	0	0	0	0	0	0	0	0	0	0	0	0	0	0	0	0	0	0	0	0	0	0	0	0	0	1	0
287	snes-01314	After shaving her legs, a woman developed a life-threatening skin infection that required the removal of massive amounts of skin and muscle tissue.	true	48	Dr Ron Daniels BEM, chief executive of the UK Sepsis Trust, said: 'Stories like Dana's illustrate the serious damage sepsis can do.	I had a very close shave indeed.	'	Every day in the UK, individuals and families have their lives torn apart by the condition.	'But through better awareness, thousands of lives could be saved each year.	0	0	0	0	0	0	0	0	0	0	0	1	0	0	0	0	0	0	0	0	0	0	0	0	0	0	0	0	0	0	0	0	0	0	0	0	0	0	1	0
288	snes-01314	After shaving her legs, a woman developed a life-threatening skin infection that required the removal of massive amounts of skin and muscle tissue.	true	49	Every day in the UK, individuals and families have their lives torn apart by the condition.	'	Dr Ron Daniels BEM, chief executive of the UK Sepsis Trust, said: 'Stories like Dana's illustrate the serious damage sepsis can do.	'But through better awareness, thousands of lives could be saved each year.	'While necrotising fasciitis is a rare cause of sepsis, it's crucial that members of the public and healthcare professionals consider it when presented with an unwell patient.	0	0	0	0	0	0	0	0	0	0	0	0	0	0	0	0	0	0	0	0	0	0	0	0	0	0	0	0	0	0	0	0	0	0	0	0	0	0	0	0
289	snes-01314	After shaving her legs, a woman developed a life-threatening skin infection that required the removal of massive amounts of skin and muscle tissue.	true	50	'But through better awareness, thousands of lives could be saved each year.	Dr Ron Daniels BEM, chief executive of the UK Sepsis Trust, said: 'Stories like Dana's illustrate the serious damage sepsis can do.	Every day in the UK, individuals and families have their lives torn apart by the condition.	'While necrotising fasciitis is a rare cause of sepsis, it's crucial that members of the public and healthcare professionals consider it when presented with an unwell patient.	'Anyone with flu-like symptoms and one or more of the key signs of sepsis must call an ambulance immediately.	0	0	0	0	0	0	0	0	0	0	0	0	0	0	0	0	0	0	0	0	0	0	0	0	0	0	0	0	0	0	0	0	0	0	0	0	0	0	0	0
290	snes-01314	After shaving her legs, a woman developed a life-threatening skin infection that required the removal of massive amounts of skin and muscle tissue.	true	51	'While necrotising fasciitis is a rare cause of sepsis, it's crucial that members of the public and healthcare professionals consider it when presented with an unwell patient.	Every day in the UK, individuals and families have their lives torn apart by the condition.	'But through better awareness, thousands of lives could be saved each year.	'Anyone with flu-like symptoms and one or more of the key signs of sepsis must call an ambulance immediately.	With every hour that passes before the correct antibiotics are administered, the risk of death increases.	0	0	0	0	0	0	0	0	0	0	0	0	0	0	0	0	0	0	0	0	0	0	0	0	0	0	0	0	0	0	0	0	0	0	0	0	0	0	0	0
291	snes-01314	After shaving her legs, a woman developed a life-threatening skin infection that required the removal of massive amounts of skin and muscle tissue.	true	52	'Anyone with flu-like symptoms and one or more of the key signs of sepsis must call an ambulance immediately.	'But through better awareness, thousands of lives could be saved each year.	'While necrotising fasciitis is a rare cause of sepsis, it's crucial that members of the public and healthcare professionals consider it when presented with an unwell patient.	With every hour that passes before the correct antibiotics are administered, the risk of death increases.	'	0	0	0	0	0	0	0	0	0	0	0	0	0	0	0	0	0	0	0	0	0	0	0	0	0	0	0	0	0	0	0	0	0	0	0	0	0	0	0	0
292	snes-01314	After shaving her legs, a woman developed a life-threatening skin infection that required the removal of massive amounts of skin and muscle tissue.	true	53	With every hour that passes before the correct antibiotics are administered, the risk of death increases.	'While necrotising fasciitis is a rare cause of sepsis, it's crucial that members of the public and healthcare professionals consider it when presented with an unwell patient.	'Anyone with flu-like symptoms and one or more of the key signs of sepsis must call an ambulance immediately.	'	WHAT IS NECROTISING FASCIITIS? Necrotising fasciitis is most commonly caused by an infection with group A Streptococcus.	0	0	0	0	0	0	0	0	0	0	0	0	0	0	0	0	0	0	0	0	0	0	0	0	0	0	0	0	0	0	0	0	0	0	0	0	0	0	0	0
293	snes-01314	After shaving her legs, a woman developed a life-threatening skin infection that required the removal of massive amounts of skin and muscle tissue.	true	54	'	'Anyone with flu-like symptoms and one or more of the key signs of sepsis must call an ambulance immediately.	With every hour that passes before the correct antibiotics are administered, the risk of death increases.	WHAT IS NECROTISING FASCIITIS? Necrotising fasciitis is most commonly caused by an infection with group A Streptococcus.	Those infections normally last just a few days - they are mild and typically clear themselves up.	0	0	0	0	0	0	0	0	0	0	1	1	0	0	0	0	0	0	0	0	0	0	0	0	0	0	0	0	0	0	0	0	0	1	0	0	0	0	0	1
294	snes-01314	After shaving her legs, a woman developed a life-threatening skin infection that required the removal of massive amounts of skin and muscle tissue.	true	55	WHAT IS NECROTISING FASCIITIS? Necrotising fasciitis is most commonly caused by an infection with group A Streptococcus.	With every hour that passes before the correct antibiotics are administered, the risk of death increases.	'	Those infections normally last just a few days - they are mild and typically clear themselves up.	But in some unusual cases it can develop into necrotising fasciitis.	0	0	0	0	0	0	0	0	0	0	1	1	0	0	0	0	0	0	0	0	0	0	0	0	0	0	0	0	0	0	0	0	0	1	0	0	0	0	0	1
295	snes-01314	After shaving her legs, a woman developed a life-threatening skin infection that required the removal of massive amounts of skin and muscle tissue.	true	56	Those infections normally last just a few days - they are mild and typically clear themselves up.	'	WHAT IS NECROTISING FASCIITIS? Necrotising fasciitis is most commonly caused by an infection with group A Streptococcus.	But in some unusual cases it can develop into necrotising fasciitis.	They infect flat layers of a membrane known as the fascia, which are connective bands of tissue that surround muscles, nerves, fat, and blood vessels.	0	0	0	0	0	0	0	0	0	0	0	0	0	0	0	0	0	0	0	0	0	0	0	0	0	0	0	0	0	0	0	0	0	0	0	0	0	0	0	0
296	snes-01314	After shaving her legs, a woman developed a life-threatening skin infection that required the removal of massive amounts of skin and muscle tissue.	true	57	But in some unusual cases it can develop into necrotising fasciitis.	WHAT IS NECROTISING FASCIITIS? Necrotising fasciitis is most commonly caused by an infection with group A Streptococcus.	Those infections normally last just a few days - they are mild and typically clear themselves up.	They infect flat layers of a membrane known as the fascia, which are connective bands of tissue that surround muscles, nerves, fat, and blood vessels.	The infection also damages the tissues next to the fascia.	0	0	0	0	0	0	0	0	0	0	0	0	0	0	0	0	0	0	0	0	0	0	0	0	0	0	0	0	0	0	0	0	0	0	0	0	0	0	0	0
297	snes-01314	After shaving her legs, a woman developed a life-threatening skin infection that required the removal of massive amounts of skin and muscle tissue.	true	58	They infect flat layers of a membrane known as the fascia, which are connective bands of tissue that surround muscles, nerves, fat, and blood vessels.	Those infections normally last just a few days - they are mild and typically clear themselves up.	But in some unusual cases it can develop into necrotising fasciitis.	The infection also damages the tissues next to the fascia.	Sometimes toxins made by these bacteria destroy the tissue they infect, causing it to die.	0	0	0	0	0	0	0	0	0	0	0	0	0	0	0	0	0	0	0	0	0	0	0	0	0	0	0	0	0	0	0	0	0	0	0	0	0	0	0	0
298	snes-01314	After shaving her legs, a woman developed a life-threatening skin infection that required the removal of massive amounts of skin and muscle tissue.	true	59	The infection also damages the tissues next to the fascia.	But in some unusual cases it can develop into necrotising fasciitis.	They infect flat layers of a membrane known as the fascia, which are connective bands of tissue that surround muscles, nerves, fat, and blood vessels.	Sometimes toxins made by these bacteria destroy the tissue they infect, causing it to die.	When this happens, the infection is very serious and can result in loss of limbs or death.	0	0	0	0	0	0	0	0	0	0	0	0	0	0	0	0	0	0	0	0	0	0	0	0	0	0	0	0	0	0	0	0	0	0	0	0	0	0	0	0
299	snes-01314	After shaving her legs, a woman developed a life-threatening skin infection that required the removal of massive amounts of skin and muscle tissue.	true	60	Sometimes toxins made by these bacteria destroy the tissue they infect, causing it to die.	They infect flat layers of a membrane known as the fascia, which are connective bands of tissue that surround muscles, nerves, fat, and blood vessels.	The infection also damages the tissues next to the fascia.	When this happens, the infection is very serious and can result in loss of limbs or death.		0	0	0	0	0	0	0	0	0	0	0	0	0	0	0	0	0	0	0	0	0	0	0	0	0	0	0	0	0	0	0	0	0	0	0	0	0	0	0	0
300	snes-01314	After shaving her legs, a woman developed a life-threatening skin infection that required the removal of massive amounts of skin and muscle tissue.	true	61	When this happens, the infection is very serious and can result in loss of limbs or death.	The infection also damages the tissues next to the fascia.	Sometimes toxins made by these bacteria destroy the tissue they infect, causing it to die.			0	0	0	0	0	0	0	0	0	0	0	0	0	0	0	0	0	0	0	0	0	0	0	0	0	0	0	0	0	0	0	0	0	0	0	0	0	0	0	0
302	snes-06293	Baby Orajel can cause infants to stop breathing and turn blue.	true	1	Dear all,I hope everyone is enjoying their summer.			Some of you already know, but we wanted to make everyone aware of a terrifying experience that we had over the weekend.	Thank g-d, everything’s ok now	0	0	0	0	0	0	0	0	0	0	0	0	0	0	0	0	0	0	0	0	0	0	0	0	0	0	0	0	0	0	0	0	0	0	0	0	0	0	0	0
303	snes-06293	Baby Orajel can cause infants to stop breathing and turn blue.	true	2	Some of you already know, but we wanted to make everyone aware of a terrifying experience that we had over the weekend.		Dear all,I hope everyone is enjoying their summer.	Thank g-d, everything’s ok now	but we thought friends and family would want to be aware and would want to advise others with babies.	0	1	0	0	0	0	0	0	0	0	0	0	0	0	0	0	0	0	0	0	0	0	0	0	0	0	0	0	0	0	0	0	0	0	0	0	0	0	0	0
304	snes-06293	Baby Orajel can cause infants to stop breathing and turn blue.	true	3	Thank g-d, everything’s ok now	Dear all,I hope everyone is enjoying their summer.	Some of you already know, but we wanted to make everyone aware of a terrifying experience that we had over the weekend.	but we thought friends and family would want to be aware and would want to advise others with babies.	Zane’s been teething pretty badly for the past few days, and we decided to give him Baby Orajel on Sunday afternoon.	0	1	0	0	0	0	0	0	0	0	0	0	0	0	0	0	0	0	0	0	0	0	0	0	0	0	0	0	0	0	0	0	0	0	0	0	0	0	0	0
305	snes-06293	Baby Orajel can cause infants to stop breathing and turn blue.	true	4	but we thought friends and family would want to be aware and would want to advise others with babies.	Some of you already know, but we wanted to make everyone aware of a terrifying experience that we had over the weekend.	Thank g-d, everything’s ok now	Zane’s been teething pretty badly for the past few days, and we decided to give him Baby Orajel on Sunday afternoon.	We’ve given it to him a few times previously, when his first two teeth cut through, and never had a problem.	1	1	0	0	0	0	0	0	0	0	0	0	0	0	0	0	0	0	0	0	0	0	0	0	0	0	0	0	0	0	0	0	0	0	0	0	0	0	0	0
306	snes-06293	Baby Orajel can cause infants to stop breathing and turn blue.	true	5	Zane’s been teething pretty badly for the past few days, and we decided to give him Baby Orajel on Sunday afternoon.	Thank g-d, everything’s ok now	but we thought friends and family would want to be aware and would want to advise others with babies.	We’ve given it to him a few times previously, when his first two teeth cut through, and never had a problem.	Scott and I were both sitting with Zane on the floor in his room when I rubbed a dosage on his upper gum.	1	0	0	0	0	0	0	0	0	0	0	0	0	0	0	0	0	0	0	0	0	0	0	0	0	0	0	0	0	0	0	0	0	0	0	0	0	0	0	0
307	snes-06293	Baby Orajel can cause infants to stop breathing and turn blue.	true	6	We’ve given it to him a few times previously, when his first two teeth cut through, and never had a problem.	but we thought friends and family would want to be aware and would want to advise others with babies.	Zane’s been teething pretty badly for the past few days, and we decided to give him Baby Orajel on Sunday afternoon.	Scott and I were both sitting with Zane on the floor in his room when I rubbed a dosage on his upper gum.	Seconds after I gave it to him, he made a face as if he were crying but no noise came out.	1	0	0	0	0	0	0	0	0	0	0	0	0	0	0	0	0	0	0	0	0	0	0	0	0	0	0	0	0	0	0	0	0	0	0	0	0	0	0	0
308	snes-06293	Baby Orajel can cause infants to stop breathing and turn blue.	true	7	Scott and I were both sitting with Zane on the floor in his room when I rubbed a dosage on his upper gum.	Zane’s been teething pretty badly for the past few days, and we decided to give him Baby Orajel on Sunday afternoon.	We’ve given it to him a few times previously, when his first two teeth cut through, and never had a problem.	Seconds after I gave it to him, he made a face as if he were crying but no noise came out.	I picked Zane up and he immediately went limp in my arms and his face turned blueish.	1	0	0	0	0	0	0	0	0	0	0	0	0	0	0	0	0	0	0	0	0	0	0	0	0	0	0	0	0	0	0	0	0	0	0	0	0	0	0	0
309	snes-06293	Baby Orajel can cause infants to stop breathing and turn blue.	true	8	Seconds after I gave it to him, he made a face as if he were crying but no noise came out.	We’ve given it to him a few times previously, when his first two teeth cut through, and never had a problem.	Scott and I were both sitting with Zane on the floor in his room when I rubbed a dosage on his upper gum.	I picked Zane up and he immediately went limp in my arms and his face turned blueish.	He was not panicking or gasping for air – he was lifeless.	1	0	0	0	0	0	0	0	0	0	0	0	0	0	0	0	0	0	0	0	0	0	0	0	0	0	0	0	0	0	0	0	0	0	0	0	0	0	0	0
310	snes-06293	Baby Orajel can cause infants to stop breathing and turn blue.	true	9	I picked Zane up and he immediately went limp in my arms and his face turned blueish.	Scott and I were both sitting with Zane on the floor in his room when I rubbed a dosage on his upper gum.	Seconds after I gave it to him, he made a face as if he were crying but no noise came out.	He was not panicking or gasping for air – he was lifeless.	This lasted for approximately 15 seconds, but felt like an eternity.	1	0	0	0	0	0	0	0	0	0	0	0	0	0	0	0	0	0	0	0	0	0	0	0	0	0	0	0	0	0	0	0	0	0	0	0	0	0	0	0
311	snes-06293	Baby Orajel can cause infants to stop breathing and turn blue.	true	10	He was not panicking or gasping for air – he was lifeless.	Seconds after I gave it to him, he made a face as if he were crying but no noise came out.	I picked Zane up and he immediately went limp in my arms and his face turned blueish.	This lasted for approximately 15 seconds, but felt like an eternity.	Words cannot convey our feelings during that time (or even now, ever) as we attempted to revive our son.	1	0	0	0	0	0	0	0	0	0	0	0	0	0	0	0	0	0	0	0	0	0	0	0	0	0	0	0	0	0	0	0	0	0	0	0	0	0	0	0
312	snes-06293	Baby Orajel can cause infants to stop breathing and turn blue.	true	11	This lasted for approximately 15 seconds, but felt like an eternity.	I picked Zane up and he immediately went limp in my arms and his face turned blueish.	He was not panicking or gasping for air – he was lifeless.	Words cannot convey our feelings during that time (or even now, ever) as we attempted to revive our son.	No parent should ever experience such a feeling and no person should ever see something like this happen to a loved one.	1	0	0	0	0	0	0	0	0	0	0	0	0	0	0	0	0	0	0	0	0	0	0	0	0	0	0	0	0	0	0	0	0	0	0	0	0	0	0	0
313	snes-06293	Baby Orajel can cause infants to stop breathing and turn blue.	true	12	Words cannot convey our feelings during that time (or even now, ever) as we attempted to revive our son.	He was not panicking or gasping for air – he was lifeless.	This lasted for approximately 15 seconds, but felt like an eternity.	No parent should ever experience such a feeling and no person should ever see something like this happen to a loved one.	Without a doubt it was the scariest moment of our lives.	1	0	0	0	0	0	0	0	0	0	0	0	0	0	0	0	0	0	0	0	0	0	0	0	0	0	0	0	0	0	0	0	0	0	0	0	0	0	0	0
314	snes-06293	Baby Orajel can cause infants to stop breathing and turn blue.	true	13	No parent should ever experience such a feeling and no person should ever see something like this happen to a loved one.	This lasted for approximately 15 seconds, but felt like an eternity.	Words cannot convey our feelings during that time (or even now, ever) as we attempted to revive our son.	Without a doubt it was the scariest moment of our lives.	Ultimately, Zane “came to” and began to cry hysterically.	0	0	0	0	0	0	0	0	0	0	0	0	0	0	0	0	0	0	0	0	0	0	0	0	0	0	0	0	0	0	0	0	0	0	0	0	0	0	0	0
315	snes-06293	Baby Orajel can cause infants to stop breathing and turn blue.	true	14	Without a doubt it was the scariest moment of our lives.	Words cannot convey our feelings during that time (or even now, ever) as we attempted to revive our son.	No parent should ever experience such a feeling and no person should ever see something like this happen to a loved one.	Ultimately, Zane “came to” and began to cry hysterically.	Thank g-d!!!!!!!!	0	0	0	0	0	0	0	0	0	0	0	0	0	0	0	0	0	0	0	0	0	0	0	0	0	0	0	0	0	0	0	0	0	0	0	0	0	0	0	0
316	snes-06293	Baby Orajel can cause infants to stop breathing and turn blue.	true	15	Ultimately, Zane “came to” and began to cry hysterically.	No parent should ever experience such a feeling and no person should ever see something like this happen to a loved one.	Without a doubt it was the scariest moment of our lives.	Thank g-d!!!!!!!!	We spent the evening at the hospital , where Zane underwent numerous tests, all of which came back normal.	0	0	0	0	0	0	0	0	0	0	0	0	0	0	0	0	0	0	0	0	0	0	0	0	0	0	0	0	0	0	0	0	0	0	0	0	0	0	0	0
317	snes-06293	Baby Orajel can cause infants to stop breathing and turn blue.	true	16	Thank g-d!!!!!!!!	Without a doubt it was the scariest moment of our lives.	Ultimately, Zane “came to” and began to cry hysterically.	We spent the evening at the hospital , where Zane underwent numerous tests, all of which came back normal.	We also spoke with Zane’s pediatrician, who stated that she advises against the use of this product because its purpose is to numb and if it gets into an infant’s throat, it may stop them from breathing.	0	0	0	0	0	0	0	0	0	0	1	0	0	0	0	0	0	0	0	0	0	0	0	0	0	0	0	0	0	0	0	0	0	0	0	0	0	1	0	0
318	snes-06293	Baby Orajel can cause infants to stop breathing and turn blue.	true	17	We spent the evening at the hospital , where Zane underwent numerous tests, all of which came back normal.	Ultimately, Zane “came to” and began to cry hysterically.	Thank g-d!!!!!!!!	We also spoke with Zane’s pediatrician, who stated that she advises against the use of this product because its purpose is to numb and if it gets into an infant’s throat, it may stop them from breathing.	Obviously, we wanted to learn more about this product and why this happened so we conducted some internet research.	0	0	0	0	0	0	0	0	0	0	0	0	0	0	0	0	0	0	0	0	0	0	0	0	0	0	0	0	0	0	0	0	0	0	0	0	0	0	0	0
319	snes-06293	Baby Orajel can cause infants to stop breathing and turn blue.	true	18	We also spoke with Zane’s pediatrician, who stated that she advises against the use of this product because its purpose is to numb and if it gets into an infant’s throat, it may stop them from breathing.	Thank g-d!!!!!!!!	We spent the evening at the hospital , where Zane underwent numerous tests, all of which came back normal.	Obviously, we wanted to learn more about this product and why this happened so we conducted some internet research.	Interestingly, we came across some postings of parents with similar experiences.	0	0	0	0	0	0	0	0	0	0	0	0	0	0	0	0	0	0	0	0	0	0	0	0	0	0	0	0	0	0	0	0	0	0	0	0	0	0	0	0
320	snes-06293	Baby Orajel can cause infants to stop breathing and turn blue.	true	19	Obviously, we wanted to learn more about this product and why this happened so we conducted some internet research.	We spent the evening at the hospital , where Zane underwent numerous tests, all of which came back normal.	We also spoke with Zane’s pediatrician, who stated that she advises against the use of this product because its purpose is to numb and if it gets into an infant’s throat, it may stop them from breathing.	Interestingly, we came across some postings of parents with similar experiences.	Further, one website listed a side effect as, “difficulty breathing and grey/blueish face.”	0	0	0	0	0	0	0	0	0	0	0	1	0	0	0	0	0	0	0	0	0	0	0	0	0	0	0	0	0	0	0	0	0	0	0	0	0	0	0	0
321	snes-06293	Baby Orajel can cause infants to stop breathing and turn blue.	true	20	Interestingly, we came across some postings of parents with similar experiences.	We also spoke with Zane’s pediatrician, who stated that she advises against the use of this product because its purpose is to numb and if it gets into an infant’s throat, it may stop them from breathing.	Obviously, we wanted to learn more about this product and why this happened so we conducted some internet research.	Further, one website listed a side effect as, “difficulty breathing and grey/blueish face.”	Also, when we called Zane’s daycare to let them know what happened, the owner said that she’s heard of this happening before.	0	0	0	0	0	0	0	0	0	0	0	0	0	0	0	0	0	0	0	0	0	0	0	0	0	0	0	0	0	0	0	0	0	0	0	0	0	0	0	0
322	snes-06293	Baby Orajel can cause infants to stop breathing and turn blue.	true	21	Further, one website listed a side effect as, “difficulty breathing and grey/blueish face.”	Obviously, we wanted to learn more about this product and why this happened so we conducted some internet research.	Interestingly, we came across some postings of parents with similar experiences.	Also, when we called Zane’s daycare to let them know what happened, the owner said that she’s heard of this happening before.	It’s surprising then that no such warning is on the bottle and that more people do not discuss the negative and possible deadly implications of the use of this product.	0	0	0	0	1	0	0	0	0	0	0	0	0	0	0	0	0	0	0	0	0	0	0	0	0	0	0	0	0	0	0	0	0	0	0	0	0	0	0	0
323	snes-06293	Baby Orajel can cause infants to stop breathing and turn blue.	true	22	Also, when we called Zane’s daycare to let them know what happened, the owner said that she’s heard of this happening before.	Interestingly, we came across some postings of parents with similar experiences.	Further, one website listed a side effect as, “difficulty breathing and grey/blueish face.”	It’s surprising then that no such warning is on the bottle and that more people do not discuss the negative and possible deadly implications of the use of this product.	We don’t want to imagine what could’ve happened if we had given this to him at night, in his crib, as we (and many others) have done in the past, and then walked away (although, of course we monitor him throughout the night).	0	1	0	0	0	0	0	0	0	0	0	0	0	0	0	0	0	0	0	0	0	0	0	0	0	0	0	0	0	0	0	0	0	0	0	0	0	0	0	0
324	snes-06293	Baby Orajel can cause infants to stop breathing and turn blue.	true	23	It’s surprising then that no such warning is on the bottle and that more people do not discuss the negative and possible deadly implications of the use of this product.	Further, one website listed a side effect as, “difficulty breathing and grey/blueish face.”	Also, when we called Zane’s daycare to let them know what happened, the owner said that she’s heard of this happening before.	We don’t want to imagine what could’ve happened if we had given this to him at night, in his crib, as we (and many others) have done in the past, and then walked away (although, of course we monitor him throughout the night).	To reiterate, the reason we share the above with you is to strongly advise you to throw away any Baby Orajel products you have at home and please advise your friends and family of the same.	0	0	0	0	0	0	0	0	0	1	0	0	0	0	0	0	0	0	0	0	0	0	0	0	0	0	0	0	0	1	0	0	0	0	0	0	0	0	0	0
325	snes-06293	Baby Orajel can cause infants to stop breathing and turn blue.	true	24	We don’t want to imagine what could’ve happened if we had given this to him at night, in his crib, as we (and many others) have done in the past, and then walked away (although, of course we monitor him throughout the night).	Also, when we called Zane’s daycare to let them know what happened, the owner said that she’s heard of this happening before.	It’s surprising then that no such warning is on the bottle and that more people do not discuss the negative and possible deadly implications of the use of this product.	To reiterate, the reason we share the above with you is to strongly advise you to throw away any Baby Orajel products you have at home and please advise your friends and family of the same.	Trust us, it’s not worth the possible side effects.	0	0	0	0	0	0	0	0	0	1	0	1	0	0	0	0	0	0	0	0	0	0	0	0	0	0	0	0	0	1	0	0	0	0	0	0	0	0	0	0
326	snes-06293	Baby Orajel can cause infants to stop breathing and turn blue.	true	25	To reiterate, the reason we share the above with you is to strongly advise you to throw away any Baby Orajel products you have at home and please advise your friends and family of the same.	It’s surprising then that no such warning is on the bottle and that more people do not discuss the negative and possible deadly implications of the use of this product.	We don’t want to imagine what could’ve happened if we had given this to him at night, in his crib, as we (and many others) have done in the past, and then walked away (although, of course we monitor him throughout the night).	Trust us, it’s not worth the possible side effects.	Best, Scott and Allison [remainder of signature block elided]	0	0	0	0	0	0	0	0	0	0	0	1	0	0	0	0	0	0	0	0	0	0	0	0	0	0	0	0	0	0	0	0	0	0	0	0	0	0	0	0
327	snes-06293	Baby Orajel can cause infants to stop breathing and turn blue.	true	26	Trust us, it’s not worth the possible side effects.	We don’t want to imagine what could’ve happened if we had given this to him at night, in his crib, as we (and many others) have done in the past, and then walked away (although, of course we monitor him throughout the night).	To reiterate, the reason we share the above with you is to strongly advise you to throw away any Baby Orajel products you have at home and please advise your friends and family of the same.	Best, Scott and Allison [remainder of signature block elided]		0	0	0	0	0	0	0	0	0	0	0	1	0	0	0	0	0	0	0	0	0	0	0	0	0	0	0	0	0	0	0	0	0	0	0	0	0	0	0	0
328	snes-06293	Baby Orajel can cause infants to stop breathing and turn blue.	true	27	Best, Scott and Allison [remainder of signature block elided]	To reiterate, the reason we share the above with you is to strongly advise you to throw away any Baby Orajel products you have at home and please advise your friends and family of the same.	Trust us, it’s not worth the possible side effects.			0	0	0	0	0	0	0	0	0	0	0	0	0	0	0	0	0	0	0	0	0	0	0	0	0	0	0	0	0	0	0	0	0	0	0	0	0	0	0	0
329	tron-02252	Warning About Inflammatory Breast Cancer	true	0	Warning About Inflammatory Breast Cancer Source: https://www.curetoday.com/view/there-shouldn-t-be-a-first-class-and-economy-class-when-it-comes-to-live-saving-cancer-treatments Fact checking: https://www.truthorfiction.com/ibc/ Actual content: Lesser-Known Symptoms of Breast Cancer June 29, 2018 Bonnie Annis There are many signs and symptoms of breast cancer, although some of them aren't very we…			Early detection can help prevent more serious problems.	Learn more about how to recognize and protect yourself.	0	0	0	0	0	0	0	0	0	0	0	0	0	0	0	0	0	0	0	0	0	0	0	0	0	0	0	0	0	0	0	0	0	0	0	0	0	0	0	0
330	tron-02252	Warning About Inflammatory Breast Cancer	true	1	Early detection can help prevent more serious problems.		Warning About Inflammatory Breast Cancer Source: https://www.curetoday.com/view/there-shouldn-t-be-a-first-class-and-economy-class-when-it-comes-to-live-saving-cancer-treatments Fact checking: https://www.truthorfiction.com/ibc/ Actual content: Lesser-Known Symptoms of Breast Cancer June 29, 2018 Bonnie Annis There are many signs and symptoms of breast cancer, although some of them aren't very we…	Learn more about how to recognize and protect yourself.	Breast cancer.	0	0	0	0	0	0	0	0	0	0	0	0	0	0	0	0	0	0	0	0	0	0	0	0	0	0	0	0	0	0	0	0	0	0	0	0	0	0	0	0
331	tron-02252	Warning About Inflammatory Breast Cancer	true	2	Learn more about how to recognize and protect yourself.	Warning About Inflammatory Breast Cancer Source: https://www.curetoday.com/view/there-shouldn-t-be-a-first-class-and-economy-class-when-it-comes-to-live-saving-cancer-treatments Fact checking: https://www.truthorfiction.com/ibc/ Actual content: Lesser-Known Symptoms of Breast Cancer June 29, 2018 Bonnie Annis There are many signs and symptoms of breast cancer, although some of them aren't very we…	Early detection can help prevent more serious problems.	Breast cancer.	What do you think of first when you hear those words?	0	0	0	0	0	0	0	0	0	0	0	0	0	0	0	0	0	0	0	0	0	0	0	0	0	0	0	0	0	0	0	0	0	0	0	0	0	0	0	0
332	tron-02252	Warning About Inflammatory Breast Cancer	true	3	Breast cancer.	Early detection can help prevent more serious problems.	Learn more about how to recognize and protect yourself.	What do you think of first when you hear those words?	Do you immediately think of death?	0	0	0	0	0	0	0	0	0	0	0	0	0	0	0	0	0	0	0	0	0	0	0	0	0	0	0	0	0	0	0	0	0	0	0	0	0	0	0	0
333	tron-02252	Warning About Inflammatory Breast Cancer	true	4	What do you think of first when you hear those words?	Learn more about how to recognize and protect yourself.	Breast cancer.	Do you immediately think of death?	Does your mind instantly conjure up pictures of bald, gaunt women in the midst of chemotherapy treatment?	0	0	0	0	0	0	0	0	0	0	0	1	0	0	0	0	0	0	0	0	0	0	0	0	0	0	0	0	0	0	0	0	0	0	0	0	0	0	0	1
334	tron-02252	Warning About Inflammatory Breast Cancer	true	5	Do you immediately think of death?	Breast cancer.	What do you think of first when you hear those words?	Does your mind instantly conjure up pictures of bald, gaunt women in the midst of chemotherapy treatment?	Or do you see yourself in the mirror wondering if you might possibly be the next person to receive a diagnosis?	0	0	0	0	0	0	0	0	0	1	0	1	0	0	0	0	0	0	0	0	0	0	0	0	0	0	0	0	0	1	0	0	0	0	0	0	0	0	0	1
335	tron-02252	Warning About Inflammatory Breast Cancer	true	6	Does your mind instantly conjure up pictures of bald, gaunt women in the midst of chemotherapy treatment?	What do you think of first when you hear those words?	Do you immediately think of death?	Or do you see yourself in the mirror wondering if you might possibly be the next person to receive a diagnosis?	You may not have pictured any of these scenarios; instead, you may have immediately thought about the discovery of a palpable lump in breast tissue.	0	0	0	0	0	0	0	0	0	1	0	1	0	0	0	0	0	0	0	0	0	0	0	0	0	0	0	0	0	1	0	0	0	0	0	0	0	0	0	1
336	tron-02252	Warning About Inflammatory Breast Cancer	true	7	Or do you see yourself in the mirror wondering if you might possibly be the next person to receive a diagnosis?	Do you immediately think of death?	Does your mind instantly conjure up pictures of bald, gaunt women in the midst of chemotherapy treatment?	You may not have pictured any of these scenarios; instead, you may have immediately thought about the discovery of a palpable lump in breast tissue.	And while breast lumps are very common warning signs of possible cancer, they are not the only ones.	0	0	0	0	0	0	0	0	0	1	0	1	0	0	0	0	0	0	0	0	0	0	0	0	0	0	0	0	0	0	0	0	1	0	0	0	0	0	0	1
337	tron-02252	Warning About Inflammatory Breast Cancer	true	8	You may not have pictured any of these scenarios; instead, you may have immediately thought about the discovery of a palpable lump in breast tissue.	Does your mind instantly conjure up pictures of bald, gaunt women in the midst of chemotherapy treatment?	Or do you see yourself in the mirror wondering if you might possibly be the next person to receive a diagnosis?	And while breast lumps are very common warning signs of possible cancer, they are not the only ones.	There are several less-known warning signs of a possibility of breast disease.	0	0	0	0	0	0	0	0	0	0	0	0	0	0	0	0	0	0	0	0	0	0	0	0	0	0	0	0	0	0	0	0	0	0	0	0	0	0	0	0
338	tron-02252	Warning About Inflammatory Breast Cancer	true	9	And while breast lumps are very common warning signs of possible cancer, they are not the only ones.	Or do you see yourself in the mirror wondering if you might possibly be the next person to receive a diagnosis?	You may not have pictured any of these scenarios; instead, you may have immediately thought about the discovery of a palpable lump in breast tissue.	There are several less-known warning signs of a possibility of breast disease.	In this post, my desire is to bring awareness to lesser-known symptoms in hopes of helping save someone's life.	0	0	0	0	0	0	0	0	0	0	0	0	0	0	0	0	0	0	0	0	0	0	0	0	0	0	0	0	0	0	0	0	0	0	0	0	0	0	0	0
339	tron-02252	Warning About Inflammatory Breast Cancer	true	10	There are several less-known warning signs of a possibility of breast disease.	You may not have pictured any of these scenarios; instead, you may have immediately thought about the discovery of a palpable lump in breast tissue.	And while breast lumps are very common warning signs of possible cancer, they are not the only ones.	In this post, my desire is to bring awareness to lesser-known symptoms in hopes of helping save someone's life.	When it comes to breast cancer awareness, knowledge is power and the more we know, the better prepared we can be for the future.	0	0	0	0	0	0	0	0	0	0	0	0	0	0	0	0	0	0	0	0	0	0	0	0	0	0	0	0	0	0	0	0	0	0	0	0	0	0	0	0
340	tron-02252	Warning About Inflammatory Breast Cancer	true	11	In this post, my desire is to bring awareness to lesser-known symptoms in hopes of helping save someone's life.	And while breast lumps are very common warning signs of possible cancer, they are not the only ones.	There are several less-known warning signs of a possibility of breast disease.	When it comes to breast cancer awareness, knowledge is power and the more we know, the better prepared we can be for the future.	Before we begin talking about the signs and symptoms of breast cancer, may I ask you a question?	0	0	0	0	0	0	0	0	0	0	0	0	0	0	0	0	0	0	0	0	0	0	0	0	0	0	0	0	0	0	0	0	0	0	0	0	0	0	0	0
341	tron-02252	Warning About Inflammatory Breast Cancer	true	12	When it comes to breast cancer awareness, knowledge is power and the more we know, the better prepared we can be for the future.	There are several less-known warning signs of a possibility of breast disease.	In this post, my desire is to bring awareness to lesser-known symptoms in hopes of helping save someone's life.	Before we begin talking about the signs and symptoms of breast cancer, may I ask you a question?	How well do you know your breasts?	0	0	0	0	0	0	0	0	0	0	0	0	0	0	0	0	0	0	0	0	0	0	0	0	0	0	0	0	0	0	0	0	0	0	0	0	0	0	0	0
342	tron-02252	Warning About Inflammatory Breast Cancer	true	13	Before we begin talking about the signs and symptoms of breast cancer, may I ask you a question?	In this post, my desire is to bring awareness to lesser-known symptoms in hopes of helping save someone's life.	When it comes to breast cancer awareness, knowledge is power and the more we know, the better prepared we can be for the future.	How well do you know your breasts?	That's an embarrassing question for some, but it's an important one.	0	0	0	0	0	0	0	0	0	0	0	0	0	0	0	0	0	0	0	0	0	0	0	0	0	0	0	0	0	0	0	0	0	0	0	0	0	0	0	0
343	tron-02252	Warning About Inflammatory Breast Cancer	true	14	How well do you know your breasts?	When it comes to breast cancer awareness, knowledge is power and the more we know, the better prepared we can be for the future.	Before we begin talking about the signs and symptoms of breast cancer, may I ask you a question?	That's an embarrassing question for some, but it's an important one.	Do you ever take time to really look at your breasts?	0	0	0	0	0	0	0	0	0	0	0	0	0	0	0	0	0	0	0	0	0	0	0	0	0	0	0	0	0	0	0	0	0	0	0	0	0	0	0	0
344	tron-02252	Warning About Inflammatory Breast Cancer	true	15	That's an embarrassing question for some, but it's an important one.	Before we begin talking about the signs and symptoms of breast cancer, may I ask you a question?	How well do you know your breasts?	Do you ever take time to really look at your breasts?	If you haven't scrutinized them before, it's time you do.	0	0	0	0	0	0	0	0	0	0	0	0	0	0	0	0	0	0	0	0	0	0	0	0	0	0	0	0	0	0	0	0	0	0	0	0	0	0	0	0
345	tron-02252	Warning About Inflammatory Breast Cancer	true	16	Do you ever take time to really look at your breasts?	How well do you know your breasts?	That's an embarrassing question for some, but it's an important one.	If you haven't scrutinized them before, it's time you do.	When you have the opportunity, stand in front of a large mirror.	0	0	0	0	0	0	0	0	0	0	0	0	0	0	0	0	0	0	0	0	0	0	0	0	0	0	0	0	0	0	0	0	0	0	0	0	0	0	0	0
346	tron-02252	Warning About Inflammatory Breast Cancer	true	17	If you haven't scrutinized them before, it's time you do.	That's an embarrassing question for some, but it's an important one.	Do you ever take time to really look at your breasts?	When you have the opportunity, stand in front of a large mirror.	Remove your blouse and bra.	0	0	0	0	0	0	0	0	0	0	0	0	0	0	0	0	0	0	0	0	0	0	0	0	0	0	0	0	0	0	0	0	0	0	0	0	0	0	0	0
347	tron-02252	Warning About Inflammatory Breast Cancer	true	18	When you have the opportunity, stand in front of a large mirror.	Do you ever take time to really look at your breasts?	If you haven't scrutinized them before, it's time you do.	Remove your blouse and bra.	Look at yourself from the neck down.	0	0	0	0	0	0	0	0	0	0	0	0	0	0	0	0	0	0	0	0	0	0	0	0	0	0	0	0	0	0	0	0	0	0	0	0	0	0	0	0
348	tron-02252	Warning About Inflammatory Breast Cancer	true	19	Remove your blouse and bra.	If you haven't scrutinized them before, it's time you do.	When you have the opportunity, stand in front of a large mirror.	Look at yourself from the neck down.	As you view your chest area, look at the size of your breasts.	0	0	0	0	0	0	0	0	0	0	0	0	0	0	0	0	0	0	0	0	0	0	0	0	0	0	0	0	0	0	0	0	0	0	0	0	0	0	0	0
349	tron-02252	Warning About Inflammatory Breast Cancer	true	20	Look at yourself from the neck down.	When you have the opportunity, stand in front of a large mirror.	Remove your blouse and bra.	As you view your chest area, look at the size of your breasts.	They may or may not be symmetrical and that's OK.	0	0	0	0	0	0	0	0	0	0	0	0	0	0	0	0	0	0	0	0	0	0	0	0	0	0	0	0	0	0	0	0	0	0	0	0	0	0	0	0
350	tron-02252	Warning About Inflammatory Breast Cancer	true	21	As you view your chest area, look at the size of your breasts.	Remove your blouse and bra.	Look at yourself from the neck down.	They may or may not be symmetrical and that's OK.	Many women are born with one breast slightly larger or smaller than the other.	0	0	0	0	0	0	0	0	0	0	0	0	0	0	0	0	0	0	0	0	0	0	0	0	0	0	0	0	0	0	0	0	0	0	0	0	0	0	0	0
351	tron-02252	Warning About Inflammatory Breast Cancer	true	22	They may or may not be symmetrical and that's OK.	Look at yourself from the neck down.	As you view your chest area, look at the size of your breasts.	Many women are born with one breast slightly larger or smaller than the other.	The important thing is to really pay attention to how your breasts look.	0	0	0	0	0	0	0	0	0	0	0	0	0	0	0	0	0	0	0	0	0	0	0	0	0	0	0	0	0	0	0	0	0	0	0	0	0	0	0	0
352	tron-02252	Warning About Inflammatory Breast Cancer	true	23	Many women are born with one breast slightly larger or smaller than the other.	As you view your chest area, look at the size of your breasts.	They may or may not be symmetrical and that's OK.	The important thing is to really pay attention to how your breasts look.	While viewing your breasts, look at them in a scientific manner.	0	0	0	0	0	0	0	0	0	0	0	0	0	0	0	0	0	0	0	0	0	0	0	0	0	0	0	0	0	0	0	0	0	0	0	0	0	0	0	0
353	tron-02252	Warning About Inflammatory Breast Cancer	true	24	The important thing is to really pay attention to how your breasts look.	They may or may not be symmetrical and that's OK.	Many women are born with one breast slightly larger or smaller than the other.	While viewing your breasts, look at them in a scientific manner.	Do you notice any immediate areas of concern?	0	0	0	0	0	0	0	0	0	0	0	0	0	0	0	0	0	0	0	0	0	0	0	0	0	0	0	0	0	0	0	0	0	0	0	0	0	0	0	0
354	tron-02252	Warning About Inflammatory Breast Cancer	true	25	While viewing your breasts, look at them in a scientific manner.	Many women are born with one breast slightly larger or smaller than the other.	The important thing is to really pay attention to how your breasts look.	Do you notice any immediate areas of concern?	If so, make a mental note of the area.	0	0	0	0	0	0	0	0	0	0	0	0	0	0	0	0	0	0	0	0	0	0	0	0	0	0	0	0	0	0	0	0	0	0	0	0	0	0	0	0
355	tron-02252	Warning About Inflammatory Breast Cancer	true	26	Do you notice any immediate areas of concern?	The important thing is to really pay attention to how your breasts look.	While viewing your breasts, look at them in a scientific manner.	If so, make a mental note of the area.	You may even want to take a digital picture.	0	0	0	0	0	0	0	0	0	0	0	0	0	0	0	0	0	0	0	0	0	0	0	0	0	0	0	0	0	0	0	0	0	0	0	0	0	0	0	0
356	tron-02252	Warning About Inflammatory Breast Cancer	true	27	If so, make a mental note of the area.	While viewing your breasts, look at them in a scientific manner.	Do you notice any immediate areas of concern?	You may even want to take a digital picture.	Next, turn your body to the side.	0	0	0	0	0	0	0	0	0	0	0	0	0	0	0	0	0	0	0	0	0	0	0	0	0	0	0	0	0	0	0	0	0	0	0	0	0	0	0	0
357	tron-02252	Warning About Inflammatory Breast Cancer	true	28	You may even want to take a digital picture.	Do you notice any immediate areas of concern?	If so, make a mental note of the area.	Next, turn your body to the side.	View your breasts individually from each side.	0	0	0	0	0	0	0	0	0	0	0	0	0	0	0	0	0	0	0	0	0	0	0	0	0	0	0	0	0	0	0	0	0	0	0	0	0	0	0	0
358	tron-02252	Warning About Inflammatory Breast Cancer	true	29	Next, turn your body to the side.	If so, make a mental note of the area.	You may even want to take a digital picture.	View your breasts individually from each side.	Once again, look for any areas of concern.	0	0	0	0	0	0	0	0	0	0	0	0	0	0	0	0	0	0	0	0	0	0	0	0	0	0	0	0	0	0	0	0	0	0	0	0	0	0	0	0
359	tron-02252	Warning About Inflammatory Breast Cancer	true	30	View your breasts individually from each side.	You may even want to take a digital picture.	Next, turn your body to the side.	Once again, look for any areas of concern.	After completing the visual inspection of your breasts, now would be a good time to do a breast self-exam.	0	0	0	0	0	0	0	0	0	0	0	0	0	0	0	0	0	0	0	0	0	0	0	0	0	0	0	0	0	0	0	0	0	0	0	0	0	0	0	0
360	tron-02252	Warning About Inflammatory Breast Cancer	true	31	Once again, look for any areas of concern.	Next, turn your body to the side.	View your breasts individually from each side.	After completing the visual inspection of your breasts, now would be a good time to do a breast self-exam.	If you've never done one before, they are fairly easy to do.	0	0	0	0	0	0	0	0	0	0	0	0	0	0	0	0	0	0	0	0	0	0	0	0	0	0	0	0	0	0	0	0	0	0	0	0	0	0	0	0
361	tron-02252	Warning About Inflammatory Breast Cancer	true	32	After completing the visual inspection of your breasts, now would be a good time to do a breast self-exam.	View your breasts individually from each side.	Once again, look for any areas of concern.	If you've never done one before, they are fairly easy to do.	Here are step by step instructions.	0	0	0	0	0	0	0	0	0	0	0	0	0	0	0	0	0	0	0	0	0	0	0	0	0	0	0	0	0	0	0	0	0	0	0	0	0	0	0	0
362	tron-02252	Warning About Inflammatory Breast Cancer	true	33	If you've never done one before, they are fairly easy to do.	Once again, look for any areas of concern.	After completing the visual inspection of your breasts, now would be a good time to do a breast self-exam.	Here are step by step instructions.	Now, let's discuss the less common signs that could indicate a possibility of breast cancer.	0	0	0	0	0	0	0	0	0	0	0	0	0	0	0	0	0	0	0	0	0	0	0	0	0	0	0	0	0	0	0	0	0	0	0	0	0	0	0	0
363	tron-02252	Warning About Inflammatory Breast Cancer	true	34	Here are step by step instructions.	After completing the visual inspection of your breasts, now would be a good time to do a breast self-exam.	If you've never done one before, they are fairly easy to do.	Now, let's discuss the less common signs that could indicate a possibility of breast cancer.	One of the first and most commonly overlooked signs is a slight puckering of the breast.	0	0	0	0	0	0	0	0	0	0	0	0	0	0	0	0	0	0	0	0	0	0	0	0	0	0	0	0	0	0	0	0	0	0	0	0	0	0	0	0
364	tron-02252	Warning About Inflammatory Breast Cancer	true	35	Now, let's discuss the less common signs that could indicate a possibility of breast cancer.	If you've never done one before, they are fairly easy to do.	Here are step by step instructions.	One of the first and most commonly overlooked signs is a slight puckering of the breast.	The puckering may be very slight.	0	0	0	0	0	0	0	0	0	0	0	0	0	0	0	0	0	0	0	0	0	0	0	0	0	0	0	0	0	0	0	0	0	0	0	0	0	0	0	0
365	tron-02252	Warning About Inflammatory Breast Cancer	true	36	One of the first and most commonly overlooked signs is a slight puckering of the breast.	Here are step by step instructions.	Now, let's discuss the less common signs that could indicate a possibility of breast cancer.	The puckering may be very slight.	It might not be visible unless you lift your arms and look at your breasts in the mirror with arms raised.	0	0	0	0	0	0	0	0	0	0	0	0	0	0	0	0	0	0	0	0	0	0	0	0	0	0	0	0	0	0	0	0	0	0	0	0	0	0	0	0
366	tron-02252	Warning About Inflammatory Breast Cancer	true	37	The puckering may be very slight.	Now, let's discuss the less common signs that could indicate a possibility of breast cancer.	One of the first and most commonly overlooked signs is a slight puckering of the breast.	It might not be visible unless you lift your arms and look at your breasts in the mirror with arms raised.	If you notice any puckering, no matter how slight, you need to see your doctor and have this area checked.	0	0	0	0	0	0	0	0	0	0	0	0	0	0	0	0	0	0	0	0	0	0	0	0	0	0	0	0	0	0	0	0	0	0	0	0	0	0	0	0
367	tron-02252	Warning About Inflammatory Breast Cancer	true	38	It might not be visible unless you lift your arms and look at your breasts in the mirror with arms raised.	One of the first and most commonly overlooked signs is a slight puckering of the breast.	The puckering may be very slight.	If you notice any puckering, no matter how slight, you need to see your doctor and have this area checked.	The puckering may be near the nipple, along the sides of your breasts, or anywhere along your breast tissue.	0	0	0	0	0	0	0	0	0	0	0	0	0	0	0	0	0	0	0	0	0	0	0	0	0	0	0	0	0	0	0	0	0	0	0	0	0	0	0	0
368	tron-02252	Warning About Inflammatory Breast Cancer	true	39	If you notice any puckering, no matter how slight, you need to see your doctor and have this area checked.	The puckering may be very slight.	It might not be visible unless you lift your arms and look at your breasts in the mirror with arms raised.	The puckering may be near the nipple, along the sides of your breasts, or anywhere along your breast tissue.	As a tumor in the breast begins to grow, it can sometimes disrupt the architecture of the skin and cause a pulling of tissues and ligaments.	0	0	0	0	0	0	0	0	0	0	0	0	0	0	0	0	0	0	0	0	0	0	0	0	0	0	0	0	0	0	0	0	0	0	0	0	0	0	0	0
369	tron-02252	Warning About Inflammatory Breast Cancer	true	40	The puckering may be near the nipple, along the sides of your breasts, or anywhere along your breast tissue.	It might not be visible unless you lift your arms and look at your breasts in the mirror with arms raised.	If you notice any puckering, no matter how slight, you need to see your doctor and have this area checked.	As a tumor in the breast begins to grow, it can sometimes disrupt the architecture of the skin and cause a pulling of tissues and ligaments.	Puckering may be so slight it only looks like a mild indentation and it may resolve after you've moved your arms back into a normal position.	0	0	0	0	0	0	0	0	0	0	0	0	0	0	0	0	0	0	0	0	0	0	0	0	0	0	0	0	0	0	0	0	0	0	0	0	0	0	0	0
370	tron-02252	Warning About Inflammatory Breast Cancer	true	41	As a tumor in the breast begins to grow, it can sometimes disrupt the architecture of the skin and cause a pulling of tissues and ligaments.	If you notice any puckering, no matter how slight, you need to see your doctor and have this area checked.	The puckering may be near the nipple, along the sides of your breasts, or anywhere along your breast tissue.	Puckering may be so slight it only looks like a mild indentation and it may resolve after you've moved your arms back into a normal position.	Along with puckering, another possible sign of breast cancer is breast dimpling.	0	0	0	0	0	0	0	0	0	0	0	0	0	0	0	0	0	0	0	0	0	0	0	0	0	0	0	0	0	0	0	0	0	0	0	0	0	0	0	0
371	tron-02252	Warning About Inflammatory Breast Cancer	true	42	Puckering may be so slight it only looks like a mild indentation and it may resolve after you've moved your arms back into a normal position.	The puckering may be near the nipple, along the sides of your breasts, or anywhere along your breast tissue.	As a tumor in the breast begins to grow, it can sometimes disrupt the architecture of the skin and cause a pulling of tissues and ligaments.	Along with puckering, another possible sign of breast cancer is breast dimpling.	Dimpling is a type of condition that resembles the skin of an orange.	0	0	0	0	0	0	0	0	0	0	0	0	0	0	0	0	0	0	0	0	0	0	0	0	0	0	0	0	0	0	0	0	0	0	0	0	0	0	0	0
372	tron-02252	Warning About Inflammatory Breast Cancer	true	43	Along with puckering, another possible sign of breast cancer is breast dimpling.	As a tumor in the breast begins to grow, it can sometimes disrupt the architecture of the skin and cause a pulling of tissues and ligaments.	Puckering may be so slight it only looks like a mild indentation and it may resolve after you've moved your arms back into a normal position.	Dimpling is a type of condition that resembles the skin of an orange.	There may be slight pitting or dimples along the breast tissue.	0	0	0	0	0	0	0	0	0	0	0	0	0	0	0	0	0	0	0	0	0	0	0	0	0	0	0	0	0	0	0	0	0	0	0	0	0	0	0	0
373	tron-02252	Warning About Inflammatory Breast Cancer	true	44	Dimpling is a type of condition that resembles the skin of an orange.	Puckering may be so slight it only looks like a mild indentation and it may resolve after you've moved your arms back into a normal position.	Along with puckering, another possible sign of breast cancer is breast dimpling.	There may be slight pitting or dimples along the breast tissue.	If you notice any such areas, please have them checked as soon as possible.	0	0	0	0	0	0	0	0	0	0	0	0	0	0	0	0	0	0	0	0	0	0	0	0	0	0	0	0	0	0	0	0	0	0	0	0	0	0	0	0
374	tron-02252	Warning About Inflammatory Breast Cancer	true	45	There may be slight pitting or dimples along the breast tissue.	Along with puckering, another possible sign of breast cancer is breast dimpling.	Dimpling is a type of condition that resembles the skin of an orange.	If you notice any such areas, please have them checked as soon as possible.	Another less common sign of possible breast cancer involves the nipple.	0	0	0	0	0	0	0	0	0	0	0	0	0	0	0	0	0	0	0	0	0	0	0	0	0	0	0	0	0	0	0	0	0	0	0	0	0	0	0	0
375	tron-02252	Warning About Inflammatory Breast Cancer	true	46	If you notice any such areas, please have them checked as soon as possible.	Dimpling is a type of condition that resembles the skin of an orange.	There may be slight pitting or dimples along the breast tissue.	Another less common sign of possible breast cancer involves the nipple.	This symptom is more noticeable and more commonly shared with a medical professional.	0	0	0	0	0	0	0	0	0	0	0	0	0	0	0	0	0	0	0	0	0	0	0	0	0	0	0	0	0	0	0	0	0	0	0	0	0	0	0	0
376	tron-02252	Warning About Inflammatory Breast Cancer	true	47	Another less common sign of possible breast cancer involves the nipple.	There may be slight pitting or dimples along the breast tissue.	If you notice any such areas, please have them checked as soon as possible.	This symptom is more noticeable and more commonly shared with a medical professional.	This sign involves discharge.	0	0	0	0	0	0	0	0	0	0	0	0	0	0	0	0	0	0	0	0	0	0	0	0	0	0	0	0	0	0	0	0	0	0	0	0	0	0	0	0
377	tron-02252	Warning About Inflammatory Breast Cancer	true	48	This symptom is more noticeable and more commonly shared with a medical professional.	If you notice any such areas, please have them checked as soon as possible.	Another less common sign of possible breast cancer involves the nipple.	This sign involves discharge.	Any discharge that comes from the nipple on its own should be reported to a doctor, especially if it is tinged with blood.	0	0	0	0	0	0	0	0	0	0	0	0	0	0	0	0	0	0	0	0	0	0	0	0	0	0	0	0	0	0	0	0	0	0	0	0	0	0	0	0
378	tron-02252	Warning About Inflammatory Breast Cancer	true	49	This sign involves discharge.	Another less common sign of possible breast cancer involves the nipple.	This symptom is more noticeable and more commonly shared with a medical professional.	Any discharge that comes from the nipple on its own should be reported to a doctor, especially if it is tinged with blood.	Nipple discharges that come from the nipple upon squeezing, do not usually indicate breast cancer.	0	0	0	0	0	0	0	0	0	0	0	0	0	0	0	0	0	0	0	0	0	0	0	0	0	0	0	0	0	0	0	0	0	0	0	0	0	0	0	0
379	tron-02252	Warning About Inflammatory Breast Cancer	true	50	Any discharge that comes from the nipple on its own should be reported to a doctor, especially if it is tinged with blood.	This symptom is more noticeable and more commonly shared with a medical professional.	This sign involves discharge.	Nipple discharges that come from the nipple upon squeezing, do not usually indicate breast cancer.	In fact, a slightly cloudy fluid may be normal colostrum in women who are pregnant or about to begin nursing.	0	0	0	0	0	0	0	0	0	0	0	0	0	0	0	0	0	0	0	0	0	0	0	0	0	0	0	0	0	0	0	0	0	0	0	0	0	0	0	0
380	tron-02252	Warning About Inflammatory Breast Cancer	true	51	Nipple discharges that come from the nipple upon squeezing, do not usually indicate breast cancer.	This sign involves discharge.	Any discharge that comes from the nipple on its own should be reported to a doctor, especially if it is tinged with blood.	In fact, a slightly cloudy fluid may be normal colostrum in women who are pregnant or about to begin nursing.	Changes in the color of the nipple or areola should also be reported to your doctor.	0	0	0	0	0	0	0	0	0	0	0	0	0	0	0	0	0	0	0	0	0	0	0	0	0	0	0	0	0	0	0	0	0	0	0	0	0	0	0	0
381	tron-02252	Warning About Inflammatory Breast Cancer	true	52	In fact, a slightly cloudy fluid may be normal colostrum in women who are pregnant or about to begin nursing.	Any discharge that comes from the nipple on its own should be reported to a doctor, especially if it is tinged with blood.	Nipple discharges that come from the nipple upon squeezing, do not usually indicate breast cancer.	Changes in the color of the nipple or areola should also be reported to your doctor.	Sometimes a flaking or irritation of the nipple can signal a problem.	0	0	0	0	0	0	0	0	0	0	0	0	0	0	0	0	0	0	0	0	0	0	0	0	0	0	0	0	0	0	0	0	0	0	0	0	0	0	0	0
382	tron-02252	Warning About Inflammatory Breast Cancer	true	53	Changes in the color of the nipple or areola should also be reported to your doctor.	Nipple discharges that come from the nipple upon squeezing, do not usually indicate breast cancer.	In fact, a slightly cloudy fluid may be normal colostrum in women who are pregnant or about to begin nursing.	Sometimes a flaking or irritation of the nipple can signal a problem.	If your nipple has changed in appearance, pay particular attention.	0	0	0	0	0	0	0	0	0	0	0	0	0	0	0	0	0	0	0	0	0	0	0	0	0	0	0	0	0	0	0	0	0	0	0	0	0	0	0	0
383	tron-02252	Warning About Inflammatory Breast Cancer	true	54	Sometimes a flaking or irritation of the nipple can signal a problem.	In fact, a slightly cloudy fluid may be normal colostrum in women who are pregnant or about to begin nursing.	Changes in the color of the nipple or areola should also be reported to your doctor.	If your nipple has changed in appearance, pay particular attention.	Breast cancer can invade nipple tissue causing variations in texture, appearance, or color.	0	0	0	0	0	0	0	0	0	0	0	0	0	0	0	0	0	0	0	0	0	0	0	0	0	0	0	0	0	0	0	0	0	0	0	0	0	0	0	0
384	tron-02252	Warning About Inflammatory Breast Cancer	true	55	If your nipple has changed in appearance, pay particular attention.	Changes in the color of the nipple or areola should also be reported to your doctor.	Sometimes a flaking or irritation of the nipple can signal a problem.	Breast cancer can invade nipple tissue causing variations in texture, appearance, or color.	An inverting (turning inward) of the nipple could also signal a problem.	0	0	0	0	0	0	0	0	0	0	0	0	0	0	0	0	0	0	0	0	0	0	0	0	0	0	0	0	0	0	0	0	0	0	0	0	0	0	0	0
385	tron-02252	Warning About Inflammatory Breast Cancer	true	56	Breast cancer can invade nipple tissue causing variations in texture, appearance, or color.	Sometimes a flaking or irritation of the nipple can signal a problem.	If your nipple has changed in appearance, pay particular attention.	An inverting (turning inward) of the nipple could also signal a problem.	Another less known sign of breast cancer can be breast pain.	0	0	0	0	0	0	0	0	0	0	0	0	0	0	0	0	0	0	0	0	0	0	0	0	0	0	0	0	0	0	0	0	0	0	0	0	0	0	0	0
386	tron-02252	Warning About Inflammatory Breast Cancer	true	57	An inverting (turning inward) of the nipple could also signal a problem.	If your nipple has changed in appearance, pay particular attention.	Breast cancer can invade nipple tissue causing variations in texture, appearance, or color.	Another less known sign of breast cancer can be breast pain.	If you notice a particular area of your breast that hurts, like a deep, inner throbbing, have your doctor evaluate it as soon as possible.	0	0	0	0	0	0	0	0	0	0	0	0	0	0	0	0	0	0	0	0	0	0	0	0	0	0	0	0	0	0	0	0	0	0	0	0	0	0	0	0
387	tron-02252	Warning About Inflammatory Breast Cancer	true	58	Another less known sign of breast cancer can be breast pain.	Breast cancer can invade nipple tissue causing variations in texture, appearance, or color.	An inverting (turning inward) of the nipple could also signal a problem.	If you notice a particular area of your breast that hurts, like a deep, inner throbbing, have your doctor evaluate it as soon as possible.	A growing tumor can cause breast tissue pain.	0	0	0	0	0	0	0	0	0	0	0	0	0	0	0	0	0	0	0	0	0	0	0	0	0	0	0	0	0	0	0	0	0	0	0	0	0	0	0	0
388	tron-02252	Warning About Inflammatory Breast Cancer	true	59	If you notice a particular area of your breast that hurts, like a deep, inner throbbing, have your doctor evaluate it as soon as possible.	An inverting (turning inward) of the nipple could also signal a problem.	Another less known sign of breast cancer can be breast pain.	A growing tumor can cause breast tissue pain.	Red spots on the skin of the breast can also be warning signs of a problem.	0	0	0	0	0	0	0	0	0	0	0	0	0	0	0	0	0	0	0	0	0	0	0	0	0	0	0	0	0	0	0	0	0	0	0	0	0	0	0	0
389	tron-02252	Warning About Inflammatory Breast Cancer	true	60	A growing tumor can cause breast tissue pain.	Another less known sign of breast cancer can be breast pain.	If you notice a particular area of your breast that hurts, like a deep, inner throbbing, have your doctor evaluate it as soon as possible.	Red spots on the skin of the breast can also be warning signs of a problem.	Although this sign is often disregarded, it can be a very subtle warning signal of a very dangerous type of breast cancer.	0	0	0	0	0	0	0	0	0	0	0	0	0	0	0	0	0	0	0	0	0	0	0	0	0	0	0	0	0	0	0	0	0	0	0	0	0	0	0	0
390	tron-02252	Warning About Inflammatory Breast Cancer	true	61	Red spots on the skin of the breast can also be warning signs of a problem.	If you notice a particular area of your breast that hurts, like a deep, inner throbbing, have your doctor evaluate it as soon as possible.	A growing tumor can cause breast tissue pain.	Although this sign is often disregarded, it can be a very subtle warning signal of a very dangerous type of breast cancer.	Red areas on the breast tissue can warn of inflammatory breast cancer.	0	0	0	0	0	0	0	0	0	0	0	0	0	0	0	0	0	0	0	0	0	0	0	0	0	0	0	0	0	0	0	0	0	0	0	0	0	0	0	0
391	tron-02252	Warning About Inflammatory Breast Cancer	true	62	Although this sign is often disregarded, it can be a very subtle warning signal of a very dangerous type of breast cancer.	A growing tumor can cause breast tissue pain.	Red spots on the skin of the breast can also be warning signs of a problem.	Red areas on the breast tissue can warn of inflammatory breast cancer.	This type of cancer is rare, but needs to be evaluated quickly.	0	0	0	0	0	0	0	0	0	0	0	0	0	0	0	0	0	0	0	0	0	0	0	0	0	0	0	0	0	0	0	0	0	0	0	0	0	0	0	0
392	tron-02252	Warning About Inflammatory Breast Cancer	true	63	Red areas on the breast tissue can warn of inflammatory breast cancer.	Red spots on the skin of the breast can also be warning signs of a problem.	Although this sign is often disregarded, it can be a very subtle warning signal of a very dangerous type of breast cancer.	This type of cancer is rare, but needs to be evaluated quickly.	If your breast becomes warm, red, swollen, or if you notice your breast tissues has thickened, please get checked.	0	0	0	0	0	0	0	0	0	0	0	0	0	0	0	0	0	0	0	0	0	0	0	0	0	0	0	0	0	0	0	0	0	0	0	0	0	0	0	0
393	tron-02252	Warning About Inflammatory Breast Cancer	true	64	This type of cancer is rare, but needs to be evaluated quickly.	Although this sign is often disregarded, it can be a very subtle warning signal of a very dangerous type of breast cancer.	Red areas on the breast tissue can warn of inflammatory breast cancer.	If your breast becomes warm, red, swollen, or if you notice your breast tissues has thickened, please get checked.	You may only have a type of breast infection but it's always better to be safe than sorry.	0	0	0	0	0	0	0	0	0	0	0	0	0	0	0	0	0	0	0	0	0	0	0	0	0	0	0	0	0	0	0	0	0	0	0	0	0	0	0	0
394	tron-02252	Warning About Inflammatory Breast Cancer	true	65	If your breast becomes warm, red, swollen, or if you notice your breast tissues has thickened, please get checked.	Red areas on the breast tissue can warn of inflammatory breast cancer.	This type of cancer is rare, but needs to be evaluated quickly.	You may only have a type of breast infection but it's always better to be safe than sorry.	Now that you know some of the lesser known symptoms of breast cancer, please be sure and check your breasts on a regular basis.	0	0	0	0	0	0	0	0	0	0	0	0	0	0	0	0	0	0	0	0	0	0	0	0	0	0	0	0	0	0	0	0	0	0	0	0	0	0	0	0
395	tron-02252	Warning About Inflammatory Breast Cancer	true	66	You may only have a type of breast infection but it's always better to be safe than sorry.	This type of cancer is rare, but needs to be evaluated quickly.	If your breast becomes warm, red, swollen, or if you notice your breast tissues has thickened, please get checked.	Now that you know some of the lesser known symptoms of breast cancer, please be sure and check your breasts on a regular basis.	Perhaps you'd like to put a reminder in your phone calendar or find some other way to help you remember to check yourself.	0	0	0	0	0	0	0	0	0	0	0	0	0	0	0	0	0	0	0	0	0	0	0	0	0	0	0	0	0	0	0	0	0	0	0	0	0	0	0	0
396	tron-02252	Warning About Inflammatory Breast Cancer	true	67	Now that you know some of the lesser known symptoms of breast cancer, please be sure and check your breasts on a regular basis.	If your breast becomes warm, red, swollen, or if you notice your breast tissues has thickened, please get checked.	You may only have a type of breast infection but it's always better to be safe than sorry.	Perhaps you'd like to put a reminder in your phone calendar or find some other way to help you remember to check yourself.	There are even websites you can sign up for that will send you free reminders, Check Your Boobies is one such organization.	0	0	0	0	0	0	0	0	0	0	0	0	0	0	0	0	0	0	0	0	0	0	0	0	0	0	0	0	0	0	0	0	0	0	0	0	0	0	0	0
397	tron-02252	Warning About Inflammatory Breast Cancer	true	68	Perhaps you'd like to put a reminder in your phone calendar or find some other way to help you remember to check yourself.	You may only have a type of breast infection but it's always better to be safe than sorry.	Now that you know some of the lesser known symptoms of breast cancer, please be sure and check your breasts on a regular basis.	There are even websites you can sign up for that will send you free reminders, Check Your Boobies is one such organization.	Along with these symptoms, please remember, in your exams, to pay particular attention to any lumps, masses or areas of hard tissue you come across.	0	0	0	0	0	0	0	0	0	0	0	0	0	0	0	0	0	0	0	0	0	0	0	0	0	0	0	0	0	0	0	0	0	0	0	0	0	0	0	0
398	tron-02252	Warning About Inflammatory Breast Cancer	true	69	There are even websites you can sign up for that will send you free reminders, Check Your Boobies is one such organization.	Now that you know some of the lesser known symptoms of breast cancer, please be sure and check your breasts on a regular basis.	Perhaps you'd like to put a reminder in your phone calendar or find some other way to help you remember to check yourself.	Along with these symptoms, please remember, in your exams, to pay particular attention to any lumps, masses or areas of hard tissue you come across.	Also, make sure to have regular mammograms or other diagnostic tests.	0	0	0	0	0	0	0	0	0	0	0	0	0	0	0	0	0	0	0	0	0	0	0	0	0	0	0	0	0	0	0	0	0	0	0	0	0	0	0	0
399	tron-02252	Warning About Inflammatory Breast Cancer	true	70	Along with these symptoms, please remember, in your exams, to pay particular attention to any lumps, masses or areas of hard tissue you come across.	Perhaps you'd like to put a reminder in your phone calendar or find some other way to help you remember to check yourself.	There are even websites you can sign up for that will send you free reminders, Check Your Boobies is one such organization.	Also, make sure to have regular mammograms or other diagnostic tests.	While these tests are vitally important, the majority of breast cancers are found by women who are diligent to check their bodies.	0	0	0	0	0	0	0	0	0	0	0	0	0	0	0	0	0	0	0	0	0	0	0	0	0	0	0	0	0	0	0	0	0	0	0	0	0	0	0	0
400	tron-02252	Warning About Inflammatory Breast Cancer	true	71	Also, make sure to have regular mammograms or other diagnostic tests.	There are even websites you can sign up for that will send you free reminders, Check Your Boobies is one such organization.	Along with these symptoms, please remember, in your exams, to pay particular attention to any lumps, masses or areas of hard tissue you come across.	While these tests are vitally important, the majority of breast cancers are found by women who are diligent to check their bodies.	It's our responsibility to do what we can to protect ourselves.	0	0	0	0	0	0	0	0	0	0	0	0	0	0	0	0	0	0	0	0	0	0	0	0	0	0	0	0	0	0	0	0	0	0	0	0	0	0	0	0
401	tron-02252	Warning About Inflammatory Breast Cancer	true	72	While these tests are vitally important, the majority of breast cancers are found by women who are diligent to check their bodies.	Along with these symptoms, please remember, in your exams, to pay particular attention to any lumps, masses or areas of hard tissue you come across.	Also, make sure to have regular mammograms or other diagnostic tests.	It's our responsibility to do what we can to protect ourselves.	In the event you notice any of the symptoms described in this article, don't instantly become fearful and assume you have breast cancer but do see a doctor as soon as possible.	0	0	0	0	0	0	0	0	0	0	0	0	0	0	0	0	0	0	0	0	0	0	0	0	0	0	0	0	0	0	0	0	0	0	0	0	0	0	0	0
402	tron-02252	Warning About Inflammatory Breast Cancer	true	73	It's our responsibility to do what we can to protect ourselves.	Also, make sure to have regular mammograms or other diagnostic tests.	While these tests are vitally important, the majority of breast cancers are found by women who are diligent to check their bodies.	In the event you notice any of the symptoms described in this article, don't instantly become fearful and assume you have breast cancer but do see a doctor as soon as possible.	Early detection can often prevent more serious problems later.	0	0	0	0	0	0	0	0	0	0	0	0	0	0	0	0	0	0	0	0	0	0	0	0	0	0	0	0	0	0	0	0	0	0	0	0	0	0	0	0
403	tron-02252	Warning About Inflammatory Breast Cancer	true	74	In the event you notice any of the symptoms described in this article, don't instantly become fearful and assume you have breast cancer but do see a doctor as soon as possible.	While these tests are vitally important, the majority of breast cancers are found by women who are diligent to check their bodies.	It's our responsibility to do what we can to protect ourselves.	Early detection can often prevent more serious problems later.		0	0	0	0	0	0	0	0	0	0	0	0	0	0	0	0	0	0	0	0	0	0	0	0	0	0	0	0	0	0	0	0	0	0	0	0	0	0	0	0
404	tron-02252	Warning About Inflammatory Breast Cancer	true	75	Early detection can often prevent more serious problems later.	It's our responsibility to do what we can to protect ourselves.	In the event you notice any of the symptoms described in this article, don't instantly become fearful and assume you have breast cancer but do see a doctor as soon as possible.			0	0	0	0	0	0	0	0	0	0	0	0	0	0	0	0	0	0	0	0	0	0	0	0	0	0	0	0	0	0	0	0	0	0	0	0	0	0	0	0
406	tron-01367	Tyson Foods Plans to Cut U.S. Jobs, Import Chicken from China	false	1	Have you all heard about Tyson?			Cutting 75,000 jobs & sending their chicken to China from the United States to be processed in China... then sent back to America to be sold?	WE NEED TO BOYCOTT!!	0	0	0	0	0	0	0	0	0	0	0	1	0	0	0	0	0	0	0	0	0	0	0	0	0	0	0	0	0	0	0	0	0	0	0	0	0	0	0	1
407	tron-01367	Tyson Foods Plans to Cut U.S. Jobs, Import Chicken from China	false	2	Cutting 75,000 jobs & sending their chicken to China from the United States to be processed in China... then sent back to America to be sold?		Have you all heard about Tyson?	WE NEED TO BOYCOTT!!	FDA just gave its OK to do the same with our seafood and fish.	0	0	0	1	0	0	0	0	0	0	1	0	0	0	0	0	0	0	0	0	0	0	0	0	0	0	0	0	0	0	0	0	0	0	0	0	0	1	0	0
408	tron-01367	Tyson Foods Plans to Cut U.S. Jobs, Import Chicken from China	false	3	WE NEED TO BOYCOTT!!	Have you all heard about Tyson?	Cutting 75,000 jobs & sending their chicken to China from the United States to be processed in China... then sent back to America to be sold?	FDA just gave its OK to do the same with our seafood and fish.	This should not be allowed!	0	0	0	0	0	0	0	0	0	0	1	0	0	0	0	0	0	0	0	0	0	0	0	0	0	0	0	0	0	0	0	0	0	1	0	0	0	1	0	0
409	tron-01367	Tyson Foods Plans to Cut U.S. Jobs, Import Chicken from China	false	4	FDA just gave its OK to do the same with our seafood and fish.	Cutting 75,000 jobs & sending their chicken to China from the United States to be processed in China... then sent back to America to be sold?	WE NEED TO BOYCOTT!!	This should not be allowed!		0	0	0	0	0	0	0	0	0	0	0	0	0	0	0	0	0	0	0	0	0	0	0	0	0	0	0	0	0	0	0	0	0	0	0	0	0	0	0	0
410	tron-01367	Tyson Foods Plans to Cut U.S. Jobs, Import Chicken from China	false	5	This should not be allowed!	WE NEED TO BOYCOTT!!	FDA just gave its OK to do the same with our seafood and fish.			0	0	0	0	0	0	0	0	0	0	0	0	0	0	0	0	0	0	0	0	0	0	0	0	0	0	0	0	0	0	0	0	0	0	0	0	0	0	0	0
411	snes-04766	Dryer sheets permeated with fabric softener contain at least seven dangerous toxic chemicals.	false	0	Dryer sheets cause hormone imbalance, neurotoxicity, respiratory problems, and even cancer April 11, 2016 By Admin Most commercial dryer sheets are loaded with all sorts of toxic chemicals including Benzyl Acetate, Benzyl Alcohol, Chloroform and Linalool; none of which are good for your health.			In addition to all the chemicals that end up on your skin, when heated, the fumes are also toxic.	These toxins go straight to their brain's most sensitive neurological centers and wreck havoc.	0	0	0	0	1	0	0	0	0	0	0	0	0	0	0	0	0	0	0	0	0	0	0	0	0	0	0	0	0	0	0	0	0	0	0	0	0	0	0	0
412	snes-04766	Dryer sheets permeated with fabric softener contain at least seven dangerous toxic chemicals.	false	1	In addition to all the chemicals that end up on your skin, when heated, the fumes are also toxic.		Dryer sheets cause hormone imbalance, neurotoxicity, respiratory problems, and even cancer April 11, 2016 By Admin Most commercial dryer sheets are loaded with all sorts of toxic chemicals including Benzyl Acetate, Benzyl Alcohol, Chloroform and Linalool; none of which are good for your health.	These toxins go straight to their brain's most sensitive neurological centers and wreck havoc.	5 Killer Reasons to Ditch Dryer Sheets Artificial Fragrances	0	0	0	0	0	0	0	0	0	1	0	0	0	0	0	0	0	0	0	0	0	0	0	0	0	0	0	0	0	1	0	0	0	0	0	0	0	0	0	0
413	snes-04766	Dryer sheets permeated with fabric softener contain at least seven dangerous toxic chemicals.	false	2	These toxins go straight to their brain's most sensitive neurological centers and wreck havoc.	Dryer sheets cause hormone imbalance, neurotoxicity, respiratory problems, and even cancer April 11, 2016 By Admin Most commercial dryer sheets are loaded with all sorts of toxic chemicals including Benzyl Acetate, Benzyl Alcohol, Chloroform and Linalool; none of which are good for your health.	In addition to all the chemicals that end up on your skin, when heated, the fumes are also toxic.	5 Killer Reasons to Ditch Dryer Sheets Artificial Fragrances	When people use dryer sheets, they are coating their cloths with artificial chemical perfumes.	0	0	0	0	0	0	0	0	0	1	0	0	0	0	0	0	0	0	0	0	0	0	0	0	0	0	0	0	0	1	0	0	0	0	0	0	0	0	0	0
414	snes-04766	Dryer sheets permeated with fabric softener contain at least seven dangerous toxic chemicals.	false	3	5 Killer Reasons to Ditch Dryer Sheets Artificial Fragrances	In addition to all the chemicals that end up on your skin, when heated, the fumes are also toxic.	These toxins go straight to their brain's most sensitive neurological centers and wreck havoc.	When people use dryer sheets, they are coating their cloths with artificial chemical perfumes.	These fragrance chemical are really toxic chemicals.	0	0	0	0	0	0	0	0	0	0	0	0	0	0	0	0	0	0	0	0	0	0	0	0	0	0	0	0	0	0	0	0	0	0	0	0	0	0	0	0
415	snes-04766	Dryer sheets permeated with fabric softener contain at least seven dangerous toxic chemicals.	false	4	When people use dryer sheets, they are coating their cloths with artificial chemical perfumes.	These toxins go straight to their brain's most sensitive neurological centers and wreck havoc.	5 Killer Reasons to Ditch Dryer Sheets Artificial Fragrances	These fragrance chemical are really toxic chemicals.	They are known carcinogens that cause liver damage and cancer in mammals.	0	0	0	0	0	0	0	0	0	0	0	0	0	0	0	0	0	0	0	0	0	0	0	0	0	0	0	0	0	0	0	0	0	0	0	0	0	0	0	0
416	snes-04766	Dryer sheets permeated with fabric softener contain at least seven dangerous toxic chemicals.	false	5	These fragrance chemical are really toxic chemicals.	5 Killer Reasons to Ditch Dryer Sheets Artificial Fragrances	When people use dryer sheets, they are coating their cloths with artificial chemical perfumes.	They are known carcinogens that cause liver damage and cancer in mammals.	(study)	0	0	0	0	0	0	0	0	0	1	0	0	0	0	0	0	0	0	0	0	0	0	0	0	0	0	0	0	0	1	0	0	0	0	0	0	0	0	0	0
417	snes-04766	Dryer sheets permeated with fabric softener contain at least seven dangerous toxic chemicals.	false	6	They are known carcinogens that cause liver damage and cancer in mammals.	When people use dryer sheets, they are coating their cloths with artificial chemical perfumes.	These fragrance chemical are really toxic chemicals.	(study)	In a recent study performed by UW professor Dr. Anne Steinemann, a research team conducted a small study to understand the effects of fragrances in laundry products (both detergent and dryer sheets).	0	0	0	0	0	0	0	0	0	1	0	0	0	0	0	0	0	0	0	0	0	0	0	0	0	0	0	0	0	1	0	0	0	0	0	0	0	0	0	0
418	snes-04766	Dryer sheets permeated with fabric softener contain at least seven dangerous toxic chemicals.	false	7	(study)	These fragrance chemical are really toxic chemicals.	They are known carcinogens that cause liver damage and cancer in mammals.	In a recent study performed by UW professor Dr. Anne Steinemann, a research team conducted a small study to understand the effects of fragrances in laundry products (both detergent and dryer sheets).	The resultsd discovered more than 25 VOCs emitted from dryer vents, with highest concentrations of acetaldehyde, acetone, and ethanol (two of which are considered carcinogenic).	0	0	0	0	0	0	0	0	0	0	0	1	0	0	0	0	0	0	0	0	0	0	0	0	0	0	0	0	0	0	0	0	0	0	0	0	0	0	1	0
419	snes-04766	Dryer sheets permeated with fabric softener contain at least seven dangerous toxic chemicals.	false	8	In a recent study performed by UW professor Dr. Anne Steinemann, a research team conducted a small study to understand the effects of fragrances in laundry products (both detergent and dryer sheets).	They are known carcinogens that cause liver damage and cancer in mammals.	(study)	The resultsd discovered more than 25 VOCs emitted from dryer vents, with highest concentrations of acetaldehyde, acetone, and ethanol (two of which are considered carcinogenic).	To put it in context, one of the carcinogenic VOC's, acetaldehyde, had emissions that would represent 3% of total acetaldehyde emissions from automobiles in the study area.	0	0	0	0	0	0	1	0	0	0	0	1	0	0	0	0	0	0	0	0	1	0	0	0	0	0	0	0	0	0	0	0	0	0	0	0	0	0	1	0
420	snes-04766	Dryer sheets permeated with fabric softener contain at least seven dangerous toxic chemicals.	false	9	The resultsd discovered more than 25 VOCs emitted from dryer vents, with highest concentrations of acetaldehyde, acetone, and ethanol (two of which are considered carcinogenic).	(study)	In a recent study performed by UW professor Dr. Anne Steinemann, a research team conducted a small study to understand the effects of fragrances in laundry products (both detergent and dryer sheets).	To put it in context, one of the carcinogenic VOC's, acetaldehyde, had emissions that would represent 3% of total acetaldehyde emissions from automobiles in the study area.	This is a major omission of toxic chemicals.	0	0	0	0	0	0	1	0	0	0	0	0	0	0	0	0	0	0	0	0	1	0	0	0	0	0	0	0	0	0	0	0	0	0	0	0	0	0	0	0
421	snes-04766	Dryer sheets permeated with fabric softener contain at least seven dangerous toxic chemicals.	false	10	To put it in context, one of the carcinogenic VOC's, acetaldehyde, had emissions that would represent 3% of total acetaldehyde emissions from automobiles in the study area.	In a recent study performed by UW professor Dr. Anne Steinemann, a research team conducted a small study to understand the effects of fragrances in laundry products (both detergent and dryer sheets).	The resultsd discovered more than 25 VOCs emitted from dryer vents, with highest concentrations of acetaldehyde, acetone, and ethanol (two of which are considered carcinogenic).	This is a major omission of toxic chemicals.	According to the U.S. Environmental Protection Agency (EPA) and industry-generated Material Safety Data Sheets (MSDS) from the 1990s, the following is a list of chemicals in fabric softener products, most in untested combinations.	0	0	0	0	0	0	1	0	0	0	0	0	0	0	0	0	0	0	0	0	1	0	0	0	0	0	0	0	0	0	0	0	0	0	0	0	0	0	0	0
422	snes-04766	Dryer sheets permeated with fabric softener contain at least seven dangerous toxic chemicals.	false	11	This is a major omission of toxic chemicals.	The resultsd discovered more than 25 VOCs emitted from dryer vents, with highest concentrations of acetaldehyde, acetone, and ethanol (two of which are considered carcinogenic).	To put it in context, one of the carcinogenic VOC's, acetaldehyde, had emissions that would represent 3% of total acetaldehyde emissions from automobiles in the study area.	According to the U.S. Environmental Protection Agency (EPA) and industry-generated Material Safety Data Sheets (MSDS) from the 1990s, the following is a list of chemicals in fabric softener products, most in untested combinations.	1. Alpha-Terpineol-This chemical has been linked to disorders of the brain and nervous system, loss of muscle control, depression, and headaches 2.	0	0	0	0	0	0	0	0	0	0	0	1	0	0	0	0	0	0	0	0	0	0	0	0	0	0	0	0	0	0	0	0	0	0	0	0	0	0	1	0
423	snes-04766	Dryer sheets permeated with fabric softener contain at least seven dangerous toxic chemicals.	false	12	According to the U.S. Environmental Protection Agency (EPA) and industry-generated Material Safety Data Sheets (MSDS) from the 1990s, the following is a list of chemicals in fabric softener products, most in untested combinations.	To put it in context, one of the carcinogenic VOC's, acetaldehyde, had emissions that would represent 3% of total acetaldehyde emissions from automobiles in the study area.	This is a major omission of toxic chemicals.	1. Alpha-Terpineol-This chemical has been linked to disorders of the brain and nervous system, loss of muscle control, depression, and headaches 2.	Benzyl acetate-Benzyl acetate has been linked to cancer of the pancreas 3.	0	0	0	0	0	0	0	0	0	0	0	1	0	0	0	0	0	0	0	0	0	0	0	0	0	0	0	0	0	0	0	0	0	0	0	0	0	0	1	0
424	snes-04766	Dryer sheets permeated with fabric softener contain at least seven dangerous toxic chemicals.	false	13	1. Alpha-Terpineol-This chemical has been linked to disorders of the brain and nervous system, loss of muscle control, depression, and headaches 2.	This is a major omission of toxic chemicals.	According to the U.S. Environmental Protection Agency (EPA) and industry-generated Material Safety Data Sheets (MSDS) from the 1990s, the following is a list of chemicals in fabric softener products, most in untested combinations.	Benzyl acetate-Benzyl acetate has been linked to cancer of the pancreas 3.	Benzyl alcohol-This upper respiratory tract irritant can cause central nervous system (CNS) disorders, headache, nausea, vomiting, dizziness and dramatic drops in blood pressure.	0	0	0	0	1	0	0	0	0	0	0	0	0	0	0	0	0	0	0	0	0	0	0	0	0	0	0	0	0	0	0	0	0	0	0	0	0	0	0	0
425	snes-04766	Dryer sheets permeated with fabric softener contain at least seven dangerous toxic chemicals.	false	14	Benzyl acetate-Benzyl acetate has been linked to cancer of the pancreas 3.	According to the U.S. Environmental Protection Agency (EPA) and industry-generated Material Safety Data Sheets (MSDS) from the 1990s, the following is a list of chemicals in fabric softener products, most in untested combinations.	1. Alpha-Terpineol-This chemical has been linked to disorders of the brain and nervous system, loss of muscle control, depression, and headaches 2.	Benzyl alcohol-This upper respiratory tract irritant can cause central nervous system (CNS) disorders, headache, nausea, vomiting, dizziness and dramatic drops in blood pressure.	4. Chloroform-Neurotoxic, anesthetic and carcinogenic.	0	0	0	0	1	0	0	0	0	0	0	0	0	0	0	0	0	0	0	0	0	0	0	0	0	0	0	0	0	0	0	0	0	0	0	0	0	0	0	0
426	snes-04766	Dryer sheets permeated with fabric softener contain at least seven dangerous toxic chemicals.	false	15	Benzyl alcohol-This upper respiratory tract irritant can cause central nervous system (CNS) disorders, headache, nausea, vomiting, dizziness and dramatic drops in blood pressure.	1. Alpha-Terpineol-This chemical has been linked to disorders of the brain and nervous system, loss of muscle control, depression, and headaches 2.	Benzyl acetate-Benzyl acetate has been linked to cancer of the pancreas 3.	4. Chloroform-Neurotoxic, anesthetic and carcinogenic.	Really toxic to your brain.	0	0	0	0	1	0	0	0	0	0	0	0	0	0	0	0	0	0	0	0	0	0	0	0	0	0	0	0	0	0	0	0	0	0	0	0	0	0	0	0
427	snes-04766	Dryer sheets permeated with fabric softener contain at least seven dangerous toxic chemicals.	false	16	4. Chloroform-Neurotoxic, anesthetic and carcinogenic.	Benzyl acetate-Benzyl acetate has been linked to cancer of the pancreas 3.	Benzyl alcohol-This upper respiratory tract irritant can cause central nervous system (CNS) disorders, headache, nausea, vomiting, dizziness and dramatic drops in blood pressure.	Really toxic to your brain.	Inhaling its vapors may cause loss of consciousness, nausea, headache, vomiting, and/or dizziness, drowsiness.	0	0	0	0	1	0	0	0	0	0	0	0	0	0	0	0	0	0	0	0	0	0	0	0	0	0	0	0	0	0	0	0	0	0	0	0	0	0	0	0
428	snes-04766	Dryer sheets permeated with fabric softener contain at least seven dangerous toxic chemicals.	false	17	Really toxic to your brain.	Benzyl alcohol-This upper respiratory tract irritant can cause central nervous system (CNS) disorders, headache, nausea, vomiting, dizziness and dramatic drops in blood pressure.	4. Chloroform-Neurotoxic, anesthetic and carcinogenic.	Inhaling its vapors may cause loss of consciousness, nausea, headache, vomiting, and/or dizziness, drowsiness.	5.	0	0	0	0	0	0	0	0	0	1	0	0	0	0	0	0	0	0	0	0	0	0	0	0	0	0	0	0	0	1	0	0	0	0	0	0	0	0	0	0
429	snes-04766	Dryer sheets permeated with fabric softener contain at least seven dangerous toxic chemicals.	false	18	Inhaling its vapors may cause loss of consciousness, nausea, headache, vomiting, and/or dizziness, drowsiness.	4. Chloroform-Neurotoxic, anesthetic and carcinogenic.	Really toxic to your brain.	5.	Ethanol- Another fabric softener ingredient which is on the EPA's Hazardous Waste list and linked to CNS disorders.	0	0	0	0	1	0	0	0	0	0	0	0	0	0	0	0	0	0	0	0	0	0	0	0	0	0	0	0	0	0	0	0	0	0	0	0	0	0	0	0
430	snes-04766	Dryer sheets permeated with fabric softener contain at least seven dangerous toxic chemicals.	false	19	5.	Really toxic to your brain.	Inhaling its vapors may cause loss of consciousness, nausea, headache, vomiting, and/or dizziness, drowsiness.	Ethanol- Another fabric softener ingredient which is on the EPA's Hazardous Waste list and linked to CNS disorders.	6. Ethyl Acetate-causes headaches and is on the EPA Hazardous Waste list 7.	0	0	0	0	1	0	0	0	0	0	0	0	0	0	0	0	0	0	0	0	0	0	0	0	0	0	0	0	0	0	0	0	0	0	0	0	0	0	0	0
431	snes-04766	Dryer sheets permeated with fabric softener contain at least seven dangerous toxic chemicals.	false	20	Ethanol- Another fabric softener ingredient which is on the EPA's Hazardous Waste list and linked to CNS disorders.	Inhaling its vapors may cause loss of consciousness, nausea, headache, vomiting, and/or dizziness, drowsiness.	5.	6. Ethyl Acetate-causes headaches and is on the EPA Hazardous Waste list 7.	Linalool-in studies, this chemical caused loss of muscle coordination, nervous system and brain disorders, and depression 8. Pentane-causes headaches, nausea, dizziness, fatigue, drowsiness, and depression	0	0	0	0	1	0	0	0	0	0	0	0	0	0	0	0	0	0	0	0	0	0	0	0	0	0	0	0	0	0	0	0	0	0	0	0	0	0	0	0
432	snes-04766	Dryer sheets permeated with fabric softener contain at least seven dangerous toxic chemicals.	false	21	6. Ethyl Acetate-causes headaches and is on the EPA Hazardous Waste list 7.	5.	Ethanol- Another fabric softener ingredient which is on the EPA's Hazardous Waste list and linked to CNS disorders.	Linalool-in studies, this chemical caused loss of muscle coordination, nervous system and brain disorders, and depression 8. Pentane-causes headaches, nausea, dizziness, fatigue, drowsiness, and depression	What's the alternative to toxic dryer sheets?	0	0	0	0	1	0	0	0	0	0	0	0	0	0	0	0	0	0	0	0	0	0	0	0	0	0	0	0	0	0	0	0	0	0	0	0	0	0	0	0
433	snes-04766	Dryer sheets permeated with fabric softener contain at least seven dangerous toxic chemicals.	false	22	Linalool-in studies, this chemical caused loss of muscle coordination, nervous system and brain disorders, and depression 8. Pentane-causes headaches, nausea, dizziness, fatigue, drowsiness, and depression	Ethanol- Another fabric softener ingredient which is on the EPA's Hazardous Waste list and linked to CNS disorders.	6. Ethyl Acetate-causes headaches and is on the EPA Hazardous Waste list 7.	What's the alternative to toxic dryer sheets?	Wool balls.	0	0	0	0	1	0	0	0	0	0	0	1	0	0	0	0	0	0	0	0	0	0	0	0	0	0	0	0	0	0	0	0	0	0	0	0	0	0	0	1
434	snes-04766	Dryer sheets permeated with fabric softener contain at least seven dangerous toxic chemicals.	false	23	What's the alternative to toxic dryer sheets?	6. Ethyl Acetate-causes headaches and is on the EPA Hazardous Waste list 7.	Linalool-in studies, this chemical caused loss of muscle coordination, nervous system and brain disorders, and depression 8. Pentane-causes headaches, nausea, dizziness, fatigue, drowsiness, and depression	Wool balls.	They are 100% natural and are effective at getting rid of static cling and wrinkles, soften clothes	0	0	0	0	0	0	0	0	0	0	0	1	0	0	0	0	0	0	0	0	0	0	0	0	0	0	0	0	0	0	0	0	0	0	0	0	0	0	0	1
435	snes-04766	Dryer sheets permeated with fabric softener contain at least seven dangerous toxic chemicals.	false	24	Wool balls.	Linalool-in studies, this chemical caused loss of muscle coordination, nervous system and brain disorders, and depression 8. Pentane-causes headaches, nausea, dizziness, fatigue, drowsiness, and depression	What's the alternative to toxic dryer sheets?	They are 100% natural and are effective at getting rid of static cling and wrinkles, soften clothes		0	0	0	0	0	0	0	0	0	0	0	1	0	0	0	0	0	0	0	0	0	0	0	0	0	0	0	0	0	0	0	0	0	0	0	0	0	0	0	0
436	snes-04766	Dryer sheets permeated with fabric softener contain at least seven dangerous toxic chemicals.	false	25	They are 100% natural and are effective at getting rid of static cling and wrinkles, soften clothes	What's the alternative to toxic dryer sheets?	Wool balls.			0	0	0	0	0	0	0	0	0	0	0	1	0	0	0	0	0	0	0	0	0	0	0	0	0	0	0	0	0	0	0	0	0	0	0	0	0	0	0	0
438	snes-00530	President Trump is signing a law legalizing marijuana across the United States.	false	1	Trump Set To Legalize Medical Marijuana			In All 50 States May 27, 2018 Baxter Dmitry News, US 32 <b> President Trump is set to sign legislation which will make medical marijuana federally legal for terminally ill patients.	The bill, known as the "Right to Try Act," will prohibit the FDA from banning natural cures, and allow patients to try medications that have not been approved by the FDA, but are currently under clinical trial.	0	0	0	0	0	0	0	0	0	0	0	0	0	0	0	0	0	0	0	0	0	0	0	0	0	0	0	0	0	0	0	0	0	0	0	0	0	0	0	0
439	snes-00530	President Trump is signing a law legalizing marijuana across the United States.	false	2	In All 50 States May 27, 2018 Baxter Dmitry News, US 32 <b> President Trump is set to sign legislation which will make medical marijuana federally legal for terminally ill patients.		Trump Set To Legalize Medical Marijuana	The bill, known as the "Right to Try Act," will prohibit the FDA from banning natural cures, and allow patients to try medications that have not been approved by the FDA, but are currently under clinical trial.	<b> Right to Try was passed unanimously by the Senate last summer and by the House of Representatives on Tuesday in a vote of 250 to 169, after Trump personally lobbied for its passage.	0	0	0	0	0	0	0	0	0	0	1	0	0	0	0	0	0	0	0	0	0	0	0	0	0	0	0	0	0	0	0	0	0	0	0	0	1	0	0	0
440	snes-00530	President Trump is signing a law legalizing marijuana across the United States.	false	3	The bill, known as the "Right to Try Act," will prohibit the FDA from banning natural cures, and allow patients to try medications that have not been approved by the FDA, but are currently under clinical trial.	Trump Set To Legalize Medical Marijuana	In All 50 States May 27, 2018 Baxter Dmitry News, US 32 <b> President Trump is set to sign legislation which will make medical marijuana federally legal for terminally ill patients.	<b> Right to Try was passed unanimously by the Senate last summer and by the House of Representatives on Tuesday in a vote of 250 to 169, after Trump personally lobbied for its passage.	While the bill's provisions are targeted at a wide range of medications, they also apply to medical marijuana thanks to a clinical trial being conducted by the Multidisciplinary Association of Psychedelic Sciences (MAPS).	0	0	0	0	0	0	0	0	0	0	1	0	0	0	0	0	0	0	0	0	0	0	0	0	0	0	0	0	0	0	0	0	0	0	0	0	1	0	0	0
441	snes-00530	President Trump is signing a law legalizing marijuana across the United States.	false	4	<b> Right to Try was passed unanimously by the Senate last summer and by the House of Representatives on Tuesday in a vote of 250 to 169, after Trump personally lobbied for its passage.	In All 50 States May 27, 2018 Baxter Dmitry News, US 32 <b> President Trump is set to sign legislation which will make medical marijuana federally legal for terminally ill patients.	The bill, known as the "Right to Try Act," will prohibit the FDA from banning natural cures, and allow patients to try medications that have not been approved by the FDA, but are currently under clinical trial.	While the bill's provisions are targeted at a wide range of medications, they also apply to medical marijuana thanks to a clinical trial being conducted by the Multidisciplinary Association of Psychedelic Sciences (MAPS).	Tweet embedded: Big legislation will be signed by me shortly.	0	0	0	0	0	0	0	0	0	0	1	0	0	0	0	0	0	0	0	0	0	0	0	0	0	0	0	0	0	0	0	0	0	0	0	0	1	0	0	0
442	snes-00530	President Trump is signing a law legalizing marijuana across the United States.	false	5	While the bill's provisions are targeted at a wide range of medications, they also apply to medical marijuana thanks to a clinical trial being conducted by the Multidisciplinary Association of Psychedelic Sciences (MAPS).	The bill, known as the "Right to Try Act," will prohibit the FDA from banning natural cures, and allow patients to try medications that have not been approved by the FDA, but are currently under clinical trial.	<b> Right to Try was passed unanimously by the Senate last summer and by the House of Representatives on Tuesday in a vote of 250 to 169, after Trump personally lobbied for its passage.	Tweet embedded: Big legislation will be signed by me shortly.	After many years, RIGHT TO TRY and big changes to DODD FRANK. - Donald J. Trump (@realDonaldTrump) May 23,	0	0	0	0	0	0	0	0	0	0	0	1	0	0	0	0	0	0	0	0	0	0	0	0	0	0	0	0	0	0	0	0	0	0	0	0	0	0	1	0
443	snes-00530	President Trump is signing a law legalizing marijuana across the United States.	false	6	Tweet embedded: Big legislation will be signed by me shortly.	<b> Right to Try was passed unanimously by the Senate last summer and by the House of Representatives on Tuesday in a vote of 250 to 169, after Trump personally lobbied for its passage.	While the bill's provisions are targeted at a wide range of medications, they also apply to medical marijuana thanks to a clinical trial being conducted by the Multidisciplinary Association of Psychedelic Sciences (MAPS).	After many years, RIGHT TO TRY and big changes to DODD FRANK. - Donald J. Trump (@realDonaldTrump) May 23,	2018 Herb reports: The MAPS trial, currently in the second phase of the FDA approval process, is testing the effectiveness of smoked cannabis in veterans with PTSD and meets all of the criteria set out by the Right to Try.	0	0	0	0	0	0	0	0	0	0	0	0	0	0	0	0	0	0	0	0	0	0	0	0	0	0	0	0	0	0	0	0	0	0	0	0	0	0	0	0
444	snes-00530	President Trump is signing a law legalizing marijuana across the United States.	false	7	After many years, RIGHT TO TRY and big changes to DODD FRANK. - Donald J. Trump (@realDonaldTrump) May 23,	While the bill's provisions are targeted at a wide range of medications, they also apply to medical marijuana thanks to a clinical trial being conducted by the Multidisciplinary Association of Psychedelic Sciences (MAPS).	Tweet embedded: Big legislation will be signed by me shortly.	2018 Herb reports: The MAPS trial, currently in the second phase of the FDA approval process, is testing the effectiveness of smoked cannabis in veterans with PTSD and meets all of the criteria set out by the Right to Try.	The majority of states already have their own form of Right to Try legislation, with one notable exception being New York.	0	0	0	0	0	0	0	0	0	0	1	1	0	0	0	0	0	0	0	0	0	0	0	0	0	0	0	0	0	0	0	0	0	1	0	0	0	0	1	0
445	snes-00530	President Trump is signing a law legalizing marijuana across the United States.	false	8	2018 Herb reports: The MAPS trial, currently in the second phase of the FDA approval process, is testing the effectiveness of smoked cannabis in veterans with PTSD and meets all of the criteria set out by the Right to Try.	Tweet embedded: Big legislation will be signed by me shortly.	After many years, RIGHT TO TRY and big changes to DODD FRANK. - Donald J. Trump (@realDonaldTrump) May 23,	The majority of states already have their own form of Right to Try legislation, with one notable exception being New York.	In Utah, a recently passed law specifically addresses the right of terminally ill patients to try cannabis.	0	0	0	0	0	0	0	0	0	0	0	1	0	0	0	0	0	0	0	0	0	0	0	0	0	0	0	0	0	0	0	0	0	0	0	0	0	0	1	0
446	snes-00530	President Trump is signing a law legalizing marijuana across the United States.	false	9	The majority of states already have their own form of Right to Try legislation, with one notable exception being New York.	After many years, RIGHT TO TRY and big changes to DODD FRANK. - Donald J. Trump (@realDonaldTrump) May 23,	2018 Herb reports: The MAPS trial, currently in the second phase of the FDA approval process, is testing the effectiveness of smoked cannabis in veterans with PTSD and meets all of the criteria set out by the Right to Try.	In Utah, a recently passed law specifically addresses the right of terminally ill patients to try cannabis.	However, because cannabis remains federally prohibited, even if a terminally ill patient has the "Right to Try" cannabis on the state level, they're still in violation of federal law.	0	0	0	0	0	0	0	0	0	0	0	0	0	0	0	0	0	0	0	0	0	0	0	0	0	0	0	0	0	0	0	0	0	0	0	0	0	0	0	0
447	snes-00530	President Trump is signing a law legalizing marijuana across the United States.	false	10	In Utah, a recently passed law specifically addresses the right of terminally ill patients to try cannabis.	2018 Herb reports: The MAPS trial, currently in the second phase of the FDA approval process, is testing the effectiveness of smoked cannabis in veterans with PTSD and meets all of the criteria set out by the Right to Try.	The majority of states already have their own form of Right to Try legislation, with one notable exception being New York.	However, because cannabis remains federally prohibited, even if a terminally ill patient has the "Right to Try" cannabis on the state level, they're still in violation of federal law.	The Right to Try bill, recently passed by Congress, would change that.	0	0	0	0	0	0	0	0	0	0	0	0	0	0	0	0	0	0	0	0	0	0	0	0	0	0	0	0	0	0	0	0	0	0	0	0	0	0	0	0
448	snes-00530	President Trump is signing a law legalizing marijuana across the United States.	false	11	However, because cannabis remains federally prohibited, even if a terminally ill patient has the "Right to Try" cannabis on the state level, they're still in violation of federal law.	The majority of states already have their own form of Right to Try legislation, with one notable exception being New York.	In Utah, a recently passed law specifically addresses the right of terminally ill patients to try cannabis.	The Right to Try bill, recently passed by Congress, would change that.	In addition to cannabis, MDMA and psilocybin could also potentially be used by 'eligible patients' since FDA trials of both substances meet the requirements set out in the federal bill.	0	0	0	0	0	0	0	0	0	0	0	0	0	0	0	0	0	0	0	0	0	0	0	0	0	0	0	0	0	0	0	0	0	0	0	0	0	0	0	0
449	snes-00530	President Trump is signing a law legalizing marijuana across the United States.	false	12	The Right to Try bill, recently passed by Congress, would change that.	In Utah, a recently passed law specifically addresses the right of terminally ill patients to try cannabis.	However, because cannabis remains federally prohibited, even if a terminally ill patient has the "Right to Try" cannabis on the state level, they're still in violation of federal law.	In addition to cannabis, MDMA and psilocybin could also potentially be used by 'eligible patients' since FDA trials of both substances meet the requirements set out in the federal bill.	What's not clear is what illnesses qualify as life-threatening.	0	0	0	0	0	0	0	0	0	0	0	0	0	0	0	0	0	0	0	0	0	0	0	0	0	0	0	0	0	0	0	0	0	0	0	0	0	0	0	0
450	snes-00530	President Trump is signing a law legalizing marijuana across the United States.	false	13	In addition to cannabis, MDMA and psilocybin could also potentially be used by 'eligible patients' since FDA trials of both substances meet the requirements set out in the federal bill.	However, because cannabis remains federally prohibited, even if a terminally ill patient has the "Right to Try" cannabis on the state level, they're still in violation of federal law.	The Right to Try bill, recently passed by Congress, would change that.	What's not clear is what illnesses qualify as life-threatening.	Post-traumatic stress disorder, for example, could be argued to be life-threatening given the high rates of suicide among those who are diagnosed, but it's up for debate.	0	0	0	0	0	0	0	0	0	0	0	0	0	0	0	0	0	0	0	0	0	0	0	0	0	0	0	0	0	0	0	0	0	0	0	0	0	0	0	0
451	snes-00530	President Trump is signing a law legalizing marijuana across the United States.	false	14	What's not clear is what illnesses qualify as life-threatening.	The Right to Try bill, recently passed by Congress, would change that.	In addition to cannabis, MDMA and psilocybin could also potentially be used by 'eligible patients' since FDA trials of both substances meet the requirements set out in the federal bill.	Post-traumatic stress disorder, for example, could be argued to be life-threatening given the high rates of suicide among those who are diagnosed, but it's up for debate.	It's likely that those details will be hammered out on a state by state basis in jurisdictions that have already passed their own version of Right to Try.	0	0	0	0	0	0	0	0	0	0	0	0	0	0	0	0	0	0	0	0	0	0	0	0	0	0	0	0	0	0	0	0	0	0	0	0	0	0	0	0
452	snes-00530	President Trump is signing a law legalizing marijuana across the United States.	false	15	Post-traumatic stress disorder, for example, could be argued to be life-threatening given the high rates of suicide among those who are diagnosed, but it's up for debate.	In addition to cannabis, MDMA and psilocybin could also potentially be used by 'eligible patients' since FDA trials of both substances meet the requirements set out in the federal bill.	What's not clear is what illnesses qualify as life-threatening.	It's likely that those details will be hammered out on a state by state basis in jurisdictions that have already passed their own version of Right to Try.	The full title of the bill suggests as much stating, "in accordance with State law..." However, in states that lack their own local provisions, the new bill appears to leave plenty of room for interpretation and a potential conflict with local drug laws.	0	0	0	0	0	0	0	0	0	0	0	0	0	0	0	0	0	0	0	0	0	0	0	0	0	0	0	0	0	0	0	0	0	0	0	0	0	0	0	0
453	snes-00530	President Trump is signing a law legalizing marijuana across the United States.	false	16	It's likely that those details will be hammered out on a state by state basis in jurisdictions that have already passed their own version of Right to Try.	What's not clear is what illnesses qualify as life-threatening.	Post-traumatic stress disorder, for example, could be argued to be life-threatening given the high rates of suicide among those who are diagnosed, but it's up for debate.	The full title of the bill suggests as much stating, "in accordance with State law..." However, in states that lack their own local provisions, the new bill appears to leave plenty of room for interpretation and a potential conflict with local drug laws.	Under the broad wording of the federal bill, no specific illnesses are mentioned.	0	0	0	0	0	0	0	0	0	0	0	0	0	0	0	0	0	0	0	0	0	0	0	0	0	0	0	0	0	0	0	0	0	0	0	0	0	0	0	0
454	snes-00530	President Trump is signing a law legalizing marijuana across the United States.	false	17	The full title of the bill suggests as much stating, "in accordance with State law..." However, in states that lack their own local provisions, the new bill appears to leave plenty of room for interpretation and a potential conflict with local drug laws.	Post-traumatic stress disorder, for example, could be argued to be life-threatening given the high rates of suicide among those who are diagnosed, but it's up for debate.	It's likely that those details will be hammered out on a state by state basis in jurisdictions that have already passed their own version of Right to Try.	Under the broad wording of the federal bill, no specific illnesses are mentioned.	Instead, an 'eligible patient' is defined as, "Diseases or conditions where the likelihood of death is high unless the course of the disease is interrupted; and Diseases or conditions with potentially fatal outcomes, where the endpoint of clinical trial analysis is survival.	0	0	0	0	0	0	0	0	0	0	0	0	0	0	0	0	0	0	0	0	0	0	0	0	0	0	0	0	0	0	0	0	0	0	0	0	0	0	0	0
455	snes-00530	President Trump is signing a law legalizing marijuana across the United States.	false	18	Under the broad wording of the federal bill, no specific illnesses are mentioned.	It's likely that those details will be hammered out on a state by state basis in jurisdictions that have already passed their own version of Right to Try.	The full title of the bill suggests as much stating, "in accordance with State law..." However, in states that lack their own local provisions, the new bill appears to leave plenty of room for interpretation and a potential conflict with local drug laws.	Instead, an 'eligible patient' is defined as, "Diseases or conditions where the likelihood of death is high unless the course of the disease is interrupted; and Diseases or conditions with potentially fatal outcomes, where the endpoint of clinical trial analysis is survival.	" Patients must also have exhausted all existing treatment options and must be unable to participate in the ongoing trials investigating the drug they want access to.	0	0	0	0	0	0	0	0	0	0	0	0	0	0	0	0	0	0	0	0	0	0	0	0	0	0	0	0	0	0	0	0	0	0	0	0	0	0	0	0
456	snes-00530	President Trump is signing a law legalizing marijuana across the United States.	false	19	Instead, an 'eligible patient' is defined as, "Diseases or conditions where the likelihood of death is high unless the course of the disease is interrupted; and Diseases or conditions with potentially fatal outcomes, where the endpoint of clinical trial analysis is survival.	The full title of the bill suggests as much stating, "in accordance with State law..." However, in states that lack their own local provisions, the new bill appears to leave plenty of room for interpretation and a potential conflict with local drug laws.	Under the broad wording of the federal bill, no specific illnesses are mentioned.	" Patients must also have exhausted all existing treatment options and must be unable to participate in the ongoing trials investigating the drug they want access to.	Additionally, they must provide written consent from a qualified physician who does not stand to gain from the trial.	0	0	0	0	0	0	0	0	0	0	0	0	0	0	0	0	0	0	0	0	0	0	0	0	0	0	0	0	0	0	0	0	0	0	0	0	0	0	0	0
457	snes-00530	President Trump is signing a law legalizing marijuana across the United States.	false	20	" Patients must also have exhausted all existing treatment options and must be unable to participate in the ongoing trials investigating the drug they want access to.	Under the broad wording of the federal bill, no specific illnesses are mentioned.	Instead, an 'eligible patient' is defined as, "Diseases or conditions where the likelihood of death is high unless the course of the disease is interrupted; and Diseases or conditions with potentially fatal outcomes, where the endpoint of clinical trial analysis is survival.	Additionally, they must provide written consent from a qualified physician who does not stand to gain from the trial.	The bill passed on Tuesday after receiving some opposition from Democrats on Capitol Hill who believe that the law will undermine the FDA's processes.	0	0	0	0	0	0	0	0	0	0	0	0	0	0	0	0	0	0	0	0	0	0	0	0	0	0	0	0	0	0	0	0	0	0	0	0	0	0	0	0
458	snes-00530	President Trump is signing a law legalizing marijuana across the United States.	false	21	Additionally, they must provide written consent from a qualified physician who does not stand to gain from the trial.	Instead, an 'eligible patient' is defined as, "Diseases or conditions where the likelihood of death is high unless the course of the disease is interrupted; and Diseases or conditions with potentially fatal outcomes, where the endpoint of clinical trial analysis is survival.	" Patients must also have exhausted all existing treatment options and must be unable to participate in the ongoing trials investigating the drug they want access to.	The bill passed on Tuesday after receiving some opposition from Democrats on Capitol Hill who believe that the law will undermine the FDA's processes.	It's likely that President Trump will sign the bill in the coming days since he has personally lobbied Congress for its passage.	0	0	0	0	0	0	0	0	0	0	0	0	0	0	0	0	0	0	0	0	0	0	0	0	0	0	0	0	0	0	0	0	0	0	0	0	0	0	0	0
459	snes-00530	President Trump is signing a law legalizing marijuana across the United States.	false	22	The bill passed on Tuesday after receiving some opposition from Democrats on Capitol Hill who believe that the law will undermine the FDA's processes.	" Patients must also have exhausted all existing treatment options and must be unable to participate in the ongoing trials investigating the drug they want access to.	Additionally, they must provide written consent from a qualified physician who does not stand to gain from the trial.	It's likely that President Trump will sign the bill in the coming days since he has personally lobbied Congress for its passage.	In January, Trump even mentioned the bill in his State of the Union Address saying, "People who are terminally ill should not have to go from country to country to seek a cure.	0	0	0	0	0	0	0	0	0	0	0	0	0	0	0	0	0	0	0	0	0	0	0	0	0	0	0	0	0	0	0	0	0	0	0	0	0	0	0	0
460	snes-00530	President Trump is signing a law legalizing marijuana across the United States.	false	23	It's likely that President Trump will sign the bill in the coming days since he has personally lobbied Congress for its passage.	Additionally, they must provide written consent from a qualified physician who does not stand to gain from the trial.	The bill passed on Tuesday after receiving some opposition from Democrats on Capitol Hill who believe that the law will undermine the FDA's processes.	In January, Trump even mentioned the bill in his State of the Union Address saying, "People who are terminally ill should not have to go from country to country to seek a cure.	I want to give them a chance right here at home.	0	0	0	0	0	0	0	0	0	0	0	0	0	0	0	0	0	0	0	0	0	0	0	0	0	0	0	0	0	0	0	0	0	0	0	0	0	0	0	0
461	snes-00530	President Trump is signing a law legalizing marijuana across the United States.	false	24	In January, Trump even mentioned the bill in his State of the Union Address saying, "People who are terminally ill should not have to go from country to country to seek a cure.	The bill passed on Tuesday after receiving some opposition from Democrats on Capitol Hill who believe that the law will undermine the FDA's processes.	It's likely that President Trump will sign the bill in the coming days since he has personally lobbied Congress for its passage.	I want to give them a chance right here at home.	It is time for the Congress to give these wonderful, incredible Americans the right to try.	0	0	0	0	0	0	0	0	1	0	0	0	0	0	0	0	0	0	0	0	0	0	0	0	0	0	0	1	0	0	0	0	0	0	0	0	0	0	0	0
462	snes-00530	President Trump is signing a law legalizing marijuana across the United States.	false	25	I want to give them a chance right here at home.	It's likely that President Trump will sign the bill in the coming days since he has personally lobbied Congress for its passage.	In January, Trump even mentioned the bill in his State of the Union Address saying, "People who are terminally ill should not have to go from country to country to seek a cure.	It is time for the Congress to give these wonderful, incredible Americans the right to try.	" Early Wednesday morning, Trump reiterated his support for the bill tweeting his intention to sign it into law.	0	0	0	0	0	0	0	0	1	0	0	0	0	0	0	0	0	0	0	0	0	0	0	0	0	0	0	1	0	0	0	0	0	0	0	0	0	0	0	0
463	snes-00530	President Trump is signing a law legalizing marijuana across the United States.	false	26	It is time for the Congress to give these wonderful, incredible Americans the right to try.	In January, Trump even mentioned the bill in his State of the Union Address saying, "People who are terminally ill should not have to go from country to country to seek a cure.	I want to give them a chance right here at home.	" Early Wednesday morning, Trump reiterated his support for the bill tweeting his intention to sign it into law.		0	0	0	1	0	0	0	0	1	0	0	0	0	0	0	0	0	0	0	0	0	0	0	0	0	0	0	1	0	0	0	0	0	0	0	0	0	0	0	0
464	snes-00530	President Trump is signing a law legalizing marijuana across the United States.	false	27	" Early Wednesday morning, Trump reiterated his support for the bill tweeting his intention to sign it into law.	I want to give them a chance right here at home.	It is time for the Congress to give these wonderful, incredible Americans the right to try.			0	0	0	1	0	0	0	0	1	0	0	0	0	0	0	0	0	0	0	0	0	0	0	0	0	0	0	1	0	0	0	0	0	0	0	0	0	0	0	0
465	snes-00862	In February and March 2018, hundreds of Canadian doctors signed a petition asking for the cancellation of pay deals from which they would personally benefit.	true	0	In February and March 2018, hundreds of Canadian doctors signed a petition asking for the cancellation of pay deals from which they would personally benefit.			Source: https://www.newsweek.com/500-canadian-doctors-protest-pay-raise-834813 Fact checking: https://www.snopes.com/fact-check/canada-doctors-pay-rise/ Actual content: 500 Canadian Doctors Protest Pay Raises Because They Already Make Too Much Money Hundreds of Canadian doctors, medical specialists and residents, as well as medical students, have signed a petition protesting their own pay raises,…	"We, Quebec doctors who believe in a strong public system, oppose the recent salary increases negotiated by our medical federations," reads the letter, originally posted in French, the official language in the Canadian province.	0	0	0	0	0	0	0	0	0	0	0	0	0	0	0	0	0	0	0	0	0	0	0	0	0	0	0	0	0	0	0	0	0	0	0	0	0	0	0	0
466	snes-00862	In February and March 2018, hundreds of Canadian doctors signed a petition asking for the cancellation of pay deals from which they would personally benefit.	true	1	Source: https://www.newsweek.com/500-canadian-doctors-protest-pay-raise-834813 Fact checking: https://www.snopes.com/fact-check/canada-doctors-pay-rise/ Actual content: 500 Canadian Doctors Protest Pay Raises Because They Already Make Too Much Money Hundreds of Canadian doctors, medical specialists and residents, as well as medical students, have signed a petition protesting their own pay raises,…		In February and March 2018, hundreds of Canadian doctors signed a petition asking for the cancellation of pay deals from which they would personally benefit.	"We, Quebec doctors who believe in a strong public system, oppose the recent salary increases negotiated by our medical federations," reads the letter, originally posted in French, the official language in the Canadian province.	More than 700 people have added their names to the petition since it was published on February 25.	0	0	0	0	0	0	0	0	0	0	0	0	0	0	0	0	0	0	0	0	0	0	0	0	0	0	0	0	0	0	0	0	0	0	0	0	0	0	0	0
467	snes-00862	In February and March 2018, hundreds of Canadian doctors signed a petition asking for the cancellation of pay deals from which they would personally benefit.	true	2	"We, Quebec doctors who believe in a strong public system, oppose the recent salary increases negotiated by our medical federations," reads the letter, originally posted in French, the official language in the Canadian province.	In February and March 2018, hundreds of Canadian doctors signed a petition asking for the cancellation of pay deals from which they would personally benefit.	Source: https://www.newsweek.com/500-canadian-doctors-protest-pay-raise-834813 Fact checking: https://www.snopes.com/fact-check/canada-doctors-pay-rise/ Actual content: 500 Canadian Doctors Protest Pay Raises Because They Already Make Too Much Money Hundreds of Canadian doctors, medical specialists and residents, as well as medical students, have signed a petition protesting their own pay raises,…	More than 700 people have added their names to the petition since it was published on February 25.	As of Tuesday, at least 213 general practitioners, 184 specialists, 149 resident medical doctors and 162 medical students had signed the petition, according to CNBC.	0	0	0	0	0	0	0	0	0	0	0	0	0	0	0	0	0	0	0	0	0	0	0	0	0	0	0	0	0	0	0	0	0	0	0	0	0	0	0	0
468	snes-00862	In February and March 2018, hundreds of Canadian doctors signed a petition asking for the cancellation of pay deals from which they would personally benefit.	true	3	More than 700 people have added their names to the petition since it was published on February 25.	Source: https://www.newsweek.com/500-canadian-doctors-protest-pay-raise-834813 Fact checking: https://www.snopes.com/fact-check/canada-doctors-pay-rise/ Actual content: 500 Canadian Doctors Protest Pay Raises Because They Already Make Too Much Money Hundreds of Canadian doctors, medical specialists and residents, as well as medical students, have signed a petition protesting their own pay raises,…	"We, Quebec doctors who believe in a strong public system, oppose the recent salary increases negotiated by our medical federations," reads the letter, originally posted in French, the official language in the Canadian province.	As of Tuesday, at least 213 general practitioners, 184 specialists, 149 resident medical doctors and 162 medical students had signed the petition, according to CNBC.	The doctors took umbrage with the pay bumps while nurses and clerks were over overburdened and patients faced declining services because of budget cuts to the public health care system.	0	0	0	0	0	0	0	0	0	0	0	0	0	0	0	0	0	0	0	0	0	0	0	0	0	0	0	0	0	0	0	0	0	0	0	0	0	0	0	0
469	snes-00862	In February and March 2018, hundreds of Canadian doctors signed a petition asking for the cancellation of pay deals from which they would personally benefit.	true	4	As of Tuesday, at least 213 general practitioners, 184 specialists, 149 resident medical doctors and 162 medical students had signed the petition, according to CNBC.	"We, Quebec doctors who believe in a strong public system, oppose the recent salary increases negotiated by our medical federations," reads the letter, originally posted in French, the official language in the Canadian province.	More than 700 people have added their names to the petition since it was published on February 25.	The doctors took umbrage with the pay bumps while nurses and clerks were over overburdened and patients faced declining services because of budget cuts to the public health care system.	"These increases are all the more shocking because our nurses, clerks and other professionals face very difficult working conditions, while our patients live with the lack of access to required services because of the drastic cuts in recent years and the centralization of power in the Ministry of Health," the letter said.	0	0	0	0	0	0	0	0	0	0	0	1	0	0	0	0	0	0	0	0	0	0	0	0	0	0	0	0	0	0	0	0	0	0	0	0	0	0	1	0
470	snes-00862	In February and March 2018, hundreds of Canadian doctors signed a petition asking for the cancellation of pay deals from which they would personally benefit.	true	5	The doctors took umbrage with the pay bumps while nurses and clerks were over overburdened and patients faced declining services because of budget cuts to the public health care system.	More than 700 people have added their names to the petition since it was published on February 25.	As of Tuesday, at least 213 general practitioners, 184 specialists, 149 resident medical doctors and 162 medical students had signed the petition, according to CNBC.	"These increases are all the more shocking because our nurses, clerks and other professionals face very difficult working conditions, while our patients live with the lack of access to required services because of the drastic cuts in recent years and the centralization of power in the Ministry of Health," the letter said.	"The only thing that seems to be immune to the cuts is our remuneration.	0	0	0	0	0	0	0	0	0	1	0	0	0	0	0	0	0	0	0	0	0	0	0	0	0	0	0	0	0	0	1	0	0	0	0	0	0	0	0	0
471	snes-00862	In February and March 2018, hundreds of Canadian doctors signed a petition asking for the cancellation of pay deals from which they would personally benefit.	true	6	"These increases are all the more shocking because our nurses, clerks and other professionals face very difficult working conditions, while our patients live with the lack of access to required services because of the drastic cuts in recent years and the centralization of power in the Ministry of Health," the letter said.	As of Tuesday, at least 213 general practitioners, 184 specialists, 149 resident medical doctors and 162 medical students had signed the petition, according to CNBC.	The doctors took umbrage with the pay bumps while nurses and clerks were over overburdened and patients faced declining services because of budget cuts to the public health care system.	"The only thing that seems to be immune to the cuts is our remuneration.	"	0	0	0	0	0	0	0	0	0	1	0	0	0	0	0	0	0	0	0	0	0	0	0	0	0	0	0	0	0	0	1	0	0	0	0	0	0	0	0	0
472	snes-00862	In February and March 2018, hundreds of Canadian doctors signed a petition asking for the cancellation of pay deals from which they would personally benefit.	true	7	"The only thing that seems to be immune to the cuts is our remuneration.	The doctors took umbrage with the pay bumps while nurses and clerks were over overburdened and patients faced declining services because of budget cuts to the public health care system.	"These increases are all the more shocking because our nurses, clerks and other professionals face very difficult working conditions, while our patients live with the lack of access to required services because of the drastic cuts in recent years and the centralization of power in the Ministry of Health," the letter said.	"	[image] Doctors in Canada are protesting a pay raise because they would rather that money be reallocated to help nurses, clerks and needy patients.	0	0	0	0	0	0	0	0	0	0	0	0	0	0	0	0	0	0	0	0	0	0	0	0	0	0	0	0	0	0	0	0	0	0	0	0	0	0	0	0
473	snes-00862	In February and March 2018, hundreds of Canadian doctors signed a petition asking for the cancellation of pay deals from which they would personally benefit.	true	8	"	"These increases are all the more shocking because our nurses, clerks and other professionals face very difficult working conditions, while our patients live with the lack of access to required services because of the drastic cuts in recent years and the centralization of power in the Ministry of Health," the letter said.	"The only thing that seems to be immune to the cuts is our remuneration.	[image] Doctors in Canada are protesting a pay raise because they would rather that money be reallocated to help nurses, clerks and needy patients.	The doctors took umbrage with the pay bumps while nurses and clerks were over overburdened and patients faced declining services because of budget cuts to the public health care system.	0	0	0	0	0	0	0	0	0	0	0	0	0	0	0	0	0	0	0	0	0	0	0	0	0	0	0	0	0	0	0	0	0	0	0	0	0	0	0	0
474	snes-00862	In February and March 2018, hundreds of Canadian doctors signed a petition asking for the cancellation of pay deals from which they would personally benefit.	true	9	[image] Doctors in Canada are protesting a pay raise because they would rather that money be reallocated to help nurses, clerks and needy patients.	"The only thing that seems to be immune to the cuts is our remuneration.	"	The doctors took umbrage with the pay bumps while nurses and clerks were over overburdened and patients faced declining services because of budget cuts to the public health care system.	DANIEL LEAL-OLIVAS - WPA POOL / GETTY IMAGES "We, Quebec doctors, are asking that the salary increases granted to physicians be canceled and that the resources of the system be better distributed for the good of the health care workers and to provide health services worthy to the people of Quebec," the letter said.	0	0	0	0	0	0	0	0	0	0	0	0	0	0	0	0	0	0	0	0	0	0	0	0	0	0	0	0	0	0	0	0	0	0	0	0	0	0	0	0
475	snes-00862	In February and March 2018, hundreds of Canadian doctors signed a petition asking for the cancellation of pay deals from which they would personally benefit.	true	10	The doctors took umbrage with the pay bumps while nurses and clerks were over overburdened and patients faced declining services because of budget cuts to the public health care system.	"	[image] Doctors in Canada are protesting a pay raise because they would rather that money be reallocated to help nurses, clerks and needy patients.	DANIEL LEAL-OLIVAS - WPA POOL / GETTY IMAGES "We, Quebec doctors, are asking that the salary increases granted to physicians be canceled and that the resources of the system be better distributed for the good of the health care workers and to provide health services worthy to the people of Quebec," the letter said.	Canada offers "universal coverage for medically necessary health care services provided on the basis of need, rather than the ability to pay," according to the government's website.	0	0	0	0	0	0	0	0	0	0	0	0	0	0	0	0	0	0	0	0	0	0	0	0	0	0	0	0	0	0	0	0	0	0	0	0	0	0	0	0
476	snes-00862	In February and March 2018, hundreds of Canadian doctors signed a petition asking for the cancellation of pay deals from which they would personally benefit.	true	11	DANIEL LEAL-OLIVAS - WPA POOL / GETTY IMAGES "We, Quebec doctors, are asking that the salary increases granted to physicians be canceled and that the resources of the system be better distributed for the good of the health care workers and to provide health services worthy to the people of Quebec," the letter said.	[image] Doctors in Canada are protesting a pay raise because they would rather that money be reallocated to help nurses, clerks and needy patients.	The doctors took umbrage with the pay bumps while nurses and clerks were over overburdened and patients faced declining services because of budget cuts to the public health care system.	Canada offers "universal coverage for medically necessary health care services provided on the basis of need, rather than the ability to pay," according to the government's website.	"We believe that there is a way to redistribute the resources of the Quebec health system to promote the health of the population and meet the needs of patients without pushing workers to the end," the doctors wrote.	0	0	0	0	0	0	0	0	0	0	0	0	0	0	0	0	0	0	0	0	0	0	0	0	0	0	0	0	0	0	0	0	0	0	0	0	0	0	0	0
477	snes-00862	In February and March 2018, hundreds of Canadian doctors signed a petition asking for the cancellation of pay deals from which they would personally benefit.	true	12	Canada offers "universal coverage for medically necessary health care services provided on the basis of need, rather than the ability to pay," according to the government's website.	The doctors took umbrage with the pay bumps while nurses and clerks were over overburdened and patients faced declining services because of budget cuts to the public health care system.	DANIEL LEAL-OLIVAS - WPA POOL / GETTY IMAGES "We, Quebec doctors, are asking that the salary increases granted to physicians be canceled and that the resources of the system be better distributed for the good of the health care workers and to provide health services worthy to the people of Quebec," the letter said.	"We believe that there is a way to redistribute the resources of the Quebec health system to promote the health of the population and meet the needs of patients without pushing workers to the end," the doctors wrote.	The average Canadian physician in 2016 earned some $260,924, according to a September 2017 report from the Canadian Institute for Health Information.	0	0	0	0	0	0	0	0	0	0	0	0	0	0	0	0	0	0	0	0	0	0	0	0	0	0	0	0	0	0	0	0	0	0	0	0	0	0	0	0
478	snes-00862	In February and March 2018, hundreds of Canadian doctors signed a petition asking for the cancellation of pay deals from which they would personally benefit.	true	13	"We believe that there is a way to redistribute the resources of the Quebec health system to promote the health of the population and meet the needs of patients without pushing workers to the end," the doctors wrote.	DANIEL LEAL-OLIVAS - WPA POOL / GETTY IMAGES "We, Quebec doctors, are asking that the salary increases granted to physicians be canceled and that the resources of the system be better distributed for the good of the health care workers and to provide health services worthy to the people of Quebec," the letter said.	Canada offers "universal coverage for medically necessary health care services provided on the basis of need, rather than the ability to pay," according to the government's website.	The average Canadian physician in 2016 earned some $260,924, according to a September 2017 report from the Canadian Institute for Health Information.	The institute clarified that this figure indicates gross pay and doesn't account for each doctor's overhead, it said in a statement to CNBC.	0	0	0	0	0	0	0	0	0	0	0	0	0	0	0	0	0	0	0	0	0	0	0	0	0	0	0	0	0	0	0	0	0	0	0	0	0	0	0	0
479	snes-00862	In February and March 2018, hundreds of Canadian doctors signed a petition asking for the cancellation of pay deals from which they would personally benefit.	true	14	The average Canadian physician in 2016 earned some $260,924, according to a September 2017 report from the Canadian Institute for Health Information.	Canada offers "universal coverage for medically necessary health care services provided on the basis of need, rather than the ability to pay," according to the government's website.	"We believe that there is a way to redistribute the resources of the Quebec health system to promote the health of the population and meet the needs of patients without pushing workers to the end," the doctors wrote.	The institute clarified that this figure indicates gross pay and doesn't account for each doctor's overhead, it said in a statement to CNBC.	The group that published the February 25 petition, Médecins Québécois Pour le Régime (MQRP), also authored a February 17 letter opposing $500 million in pay increases for specialist doctors, calling the increase raises "indecent.	0	0	0	0	0	0	0	0	0	0	0	1	0	0	0	0	0	0	0	0	0	0	0	0	0	0	0	0	0	0	0	0	0	0	0	0	0	0	1	0
480	snes-00862	In February and March 2018, hundreds of Canadian doctors signed a petition asking for the cancellation of pay deals from which they would personally benefit.	true	15	The institute clarified that this figure indicates gross pay and doesn't account for each doctor's overhead, it said in a statement to CNBC.	"We believe that there is a way to redistribute the resources of the Quebec health system to promote the health of the population and meet the needs of patients without pushing workers to the end," the doctors wrote.	The average Canadian physician in 2016 earned some $260,924, according to a September 2017 report from the Canadian Institute for Health Information.	The group that published the February 25 petition, Médecins Québécois Pour le Régime (MQRP), also authored a February 17 letter opposing $500 million in pay increases for specialist doctors, calling the increase raises "indecent.	" The latest letter comes after nurses held sit-ins to protest their working conditions.	0	0	0	0	0	0	0	0	0	0	0	0	0	0	0	0	0	0	0	0	0	0	0	0	0	0	0	0	0	0	0	0	0	0	0	0	0	0	0	0
481	snes-00862	In February and March 2018, hundreds of Canadian doctors signed a petition asking for the cancellation of pay deals from which they would personally benefit.	true	16	The group that published the February 25 petition, Médecins Québécois Pour le Régime (MQRP), also authored a February 17 letter opposing $500 million in pay increases for specialist doctors, calling the increase raises "indecent.	The average Canadian physician in 2016 earned some $260,924, according to a September 2017 report from the Canadian Institute for Health Information.	The institute clarified that this figure indicates gross pay and doesn't account for each doctor's overhead, it said in a statement to CNBC.	" The latest letter comes after nurses held sit-ins to protest their working conditions.	On February 1, the group of doctors published a letter of solidarity supporting their colleagues.	0	0	0	0	0	0	0	0	0	0	0	1	0	0	0	0	0	0	0	0	0	0	0	0	0	0	0	0	0	0	0	0	0	0	0	0	0	0	1	0
482	snes-00862	In February and March 2018, hundreds of Canadian doctors signed a petition asking for the cancellation of pay deals from which they would personally benefit.	true	17	" The latest letter comes after nurses held sit-ins to protest their working conditions.	The institute clarified that this figure indicates gross pay and doesn't account for each doctor's overhead, it said in a statement to CNBC.	The group that published the February 25 petition, Médecins Québécois Pour le Régime (MQRP), also authored a February 17 letter opposing $500 million in pay increases for specialist doctors, calling the increase raises "indecent.	On February 1, the group of doctors published a letter of solidarity supporting their colleagues.	"The subject of nurses' work overload is at the heart of the news following the 'sit-ins,'" MQRP wrote.	0	0	0	0	0	0	0	0	0	0	0	0	0	0	0	0	0	0	0	0	0	0	0	0	0	0	0	0	0	0	0	0	0	0	0	0	0	0	0	0
483	snes-00862	In February and March 2018, hundreds of Canadian doctors signed a petition asking for the cancellation of pay deals from which they would personally benefit.	true	18	On February 1, the group of doctors published a letter of solidarity supporting their colleagues.	The group that published the February 25 petition, Médecins Québécois Pour le Régime (MQRP), also authored a February 17 letter opposing $500 million in pay increases for specialist doctors, calling the increase raises "indecent.	" The latest letter comes after nurses held sit-ins to protest their working conditions.	"The subject of nurses' work overload is at the heart of the news following the 'sit-ins,'" MQRP wrote.	"MQRP joins its voices to those of nurses to denounce this unacceptable situation, which affects the quality of care for the Quebec population and weakens our public health system.	0	0	0	0	0	0	0	0	0	0	0	0	0	0	0	0	0	0	0	0	0	0	0	0	0	0	0	0	0	0	0	0	0	0	0	0	0	0	0	0
484	snes-00862	In February and March 2018, hundreds of Canadian doctors signed a petition asking for the cancellation of pay deals from which they would personally benefit.	true	19	"The subject of nurses' work overload is at the heart of the news following the 'sit-ins,'" MQRP wrote.	" The latest letter comes after nurses held sit-ins to protest their working conditions.	On February 1, the group of doctors published a letter of solidarity supporting their colleagues.	"MQRP joins its voices to those of nurses to denounce this unacceptable situation, which affects the quality of care for the Quebec population and weakens our public health system.	" "We also wish to remind the government that the current situation is far from normal or inevitable and is largely caused by the cuts it has imposed on the public network," the group wrote.	0	0	0	0	0	0	0	0	0	0	0	0	0	0	0	0	0	0	0	0	0	0	0	0	0	0	0	0	0	0	0	0	0	0	0	0	0	0	0	0
485	snes-00862	In February and March 2018, hundreds of Canadian doctors signed a petition asking for the cancellation of pay deals from which they would personally benefit.	true	20	"MQRP joins its voices to those of nurses to denounce this unacceptable situation, which affects the quality of care for the Quebec population and weakens our public health system.	On February 1, the group of doctors published a letter of solidarity supporting their colleagues.	"The subject of nurses' work overload is at the heart of the news following the 'sit-ins,'" MQRP wrote.	" "We also wish to remind the government that the current situation is far from normal or inevitable and is largely caused by the cuts it has imposed on the public network," the group wrote.		0	0	0	0	0	0	0	0	0	0	0	0	0	0	0	0	0	0	0	0	0	0	0	0	0	0	0	0	0	0	0	0	0	0	0	0	0	0	0	0
486	snes-00862	In February and March 2018, hundreds of Canadian doctors signed a petition asking for the cancellation of pay deals from which they would personally benefit.	true	21	" "We also wish to remind the government that the current situation is far from normal or inevitable and is largely caused by the cuts it has imposed on the public network," the group wrote.	"The subject of nurses' work overload is at the heart of the news following the 'sit-ins,'" MQRP wrote.	"MQRP joins its voices to those of nurses to denounce this unacceptable situation, which affects the quality of care for the Quebec population and weakens our public health system.			0	0	0	0	0	0	0	0	0	0	0	0	0	0	0	0	0	0	0	0	0	0	0	0	0	0	0	0	0	0	0	0	0	0	0	0	0	0	0	0
487	tron-01430	The Government is banning organic Farming	false	0	ATTENTION ORGANIC FARMERS : (bill HR 875) Set to Criminalize Organic Faming!!			TAKE ACTION NOW!!	Dear Readers, below is a very disturbing e-mail received concerning Bill HR 875 to outlaw organic farming!!!	0	0	0	0	0	0	0	0	0	0	0	0	0	0	0	0	0	0	0	0	0	0	0	0	0	0	0	0	0	0	0	0	0	0	0	0	0	0	0	0
488	tron-01430	The Government is banning organic Farming	false	1	TAKE ACTION NOW!!		ATTENTION ORGANIC FARMERS : (bill HR 875) Set to Criminalize Organic Faming!!	Dear Readers, below is a very disturbing e-mail received concerning Bill HR 875 to outlaw organic farming!!!	Please watch these videos and take action!!!!	0	0	0	0	0	0	0	0	0	1	1	0	0	0	0	0	0	0	0	0	0	0	0	0	0	0	0	0	0	0	0	0	0	1	0	0	0	1	0	0
489	tron-01430	The Government is banning organic Farming	false	2	Dear Readers, below is a very disturbing e-mail received concerning Bill HR 875 to outlaw organic farming!!!	ATTENTION ORGANIC FARMERS : (bill HR 875) Set to Criminalize Organic Faming!!	TAKE ACTION NOW!!	Please watch these videos and take action!!!!	This could be happening very very soon!	0	0	0	0	0	0	0	0	0	1	1	0	0	0	0	0	0	0	0	0	0	0	0	0	0	0	0	0	0	0	0	0	0	0	0	0	0	1	0	0
490	tron-01430	The Government is banning organic Farming	false	3	Please watch these videos and take action!!!!	TAKE ACTION NOW!!	Dear Readers, below is a very disturbing e-mail received concerning Bill HR 875 to outlaw organic farming!!!	This could be happening very very soon!	---------------------------------	0	0	0	0	0	0	0	0	0	0	1	0	0	0	0	0	0	0	0	0	0	0	0	0	0	0	0	0	0	0	0	0	0	0	0	0	0	1	0	0
491	tron-01430	The Government is banning organic Farming	false	4	This could be happening very very soon!	Dear Readers, below is a very disturbing e-mail received concerning Bill HR 875 to outlaw organic farming!!!	Please watch these videos and take action!!!!	---------------------------------	Greetings All! > >	0	0	0	0	0	0	0	0	0	0	0	0	0	0	0	0	0	0	0	0	0	0	0	0	0	0	0	0	0	0	0	0	0	0	0	0	0	0	0	0
492	tron-01430	The Government is banning organic Farming	false	5	---------------------------------	Please watch these videos and take action!!!!	This could be happening very very soon!	Greetings All! > >	This is SO important I ask <b> PLEASE READ IT NOW <b>, thank you!	0	0	0	0	0	0	0	0	0	0	0	0	0	0	0	0	0	0	0	0	0	0	0	0	0	0	0	0	0	0	0	0	0	0	0	0	0	0	0	0
493	tron-01430	The Government is banning organic Farming	false	6	Greetings All! > >	This could be happening very very soon!	---------------------------------	This is SO important I ask <b> PLEASE READ IT NOW <b>, thank you!	> and, >	0	0	0	0	0	0	0	0	0	0	0	0	0	0	0	0	0	0	0	0	0	0	0	0	0	0	0	0	0	0	0	0	0	0	0	0	0	0	0	0
494	tron-01430	The Government is banning organic Farming	false	7	This is SO important I ask <b> PLEASE READ IT NOW <b>, thank you!	---------------------------------	Greetings All! > >	> and, >	Please forward to everyone you know.....	0	0	0	0	0	0	0	0	0	0	1	0	0	0	0	0	0	0	0	0	0	0	0	0	0	0	0	0	0	0	0	0	0	0	0	0	0	0	0	0
495	tron-01430	The Government is banning organic Farming	false	8	> and, >	Greetings All! > >	This is SO important I ask <b> PLEASE READ IT NOW <b>, thank you!	Please forward to everyone you know.....	now..... > > US House and Senate are about (in a week and a half) to vote on a bill that > will OUTLAW ORGANIC FARMING (bill HR 875).	0	0	0	0	0	0	0	0	0	0	0	0	0	0	0	0	0	0	0	0	0	0	0	0	0	0	0	0	0	0	0	0	0	0	0	0	0	0	0	0
496	tron-01430	The Government is banning organic Farming	false	9	Please forward to everyone you know.....	This is SO important I ask <b> PLEASE READ IT NOW <b>, thank you!	> and, >	now..... > > US House and Senate are about (in a week and a half) to vote on a bill that > will OUTLAW ORGANIC FARMING (bill HR 875).	There is an enormous rush to get > this into law within the next 2 weeks before people realize what is > happening.	0	0	0	0	0	0	0	0	0	0	1	0	0	0	0	0	0	0	0	0	0	0	0	0	0	0	0	0	0	0	0	0	0	0	0	0	0	1	0	0
497	tron-01430	The Government is banning organic Farming	false	10	now..... > > US House and Senate are about (in a week and a half) to vote on a bill that > will OUTLAW ORGANIC FARMING (bill HR 875).	> and, >	Please forward to everyone you know.....	There is an enormous rush to get > this into law within the next 2 weeks before people realize what is > happening.	> > <b> Main backer and lobbyist is Monsanto <b> - chemical and genetic engineering > giant corporation (and Cargill, ADM, and about 35 other related > agri-giants).	0	0	0	0	0	0	0	0	0	0	1	0	0	0	0	0	0	0	0	0	0	0	0	0	0	0	0	0	0	0	0	0	0	1	0	0	0	1	0	0
498	tron-01430	The Government is banning organic Farming	false	11	There is an enormous rush to get > this into law within the next 2 weeks before people realize what is > happening.	Please forward to everyone you know.....	now..... > > US House and Senate are about (in a week and a half) to vote on a bill that > will OUTLAW ORGANIC FARMING (bill HR 875).	> > <b> Main backer and lobbyist is Monsanto <b> - chemical and genetic engineering > giant corporation (and Cargill, ADM, and about 35 other related > agri-giants).	This bill will require organic farms to use specific > fertilizers and poisonous insect sprays dictated by the newly formed agency > to "make sure there is no danger to the public food supply".	0	0	0	0	0	0	0	0	0	0	0	0	0	0	0	0	0	0	0	0	0	0	0	0	0	0	0	0	0	0	0	0	0	0	0	0	0	0	0	0
499	tron-01430	The Government is banning organic Farming	false	12	> > <b> Main backer and lobbyist is Monsanto <b> - chemical and genetic engineering > giant corporation (and Cargill, ADM, and about 35 other related > agri-giants).	now..... > > US House and Senate are about (in a week and a half) to vote on a bill that > will OUTLAW ORGANIC FARMING (bill HR 875).	There is an enormous rush to get > this into law within the next 2 weeks before people realize what is > happening.	This bill will require organic farms to use specific > fertilizers and poisonous insect sprays dictated by the newly formed agency > to "make sure there is no danger to the public food supply".	This will > include backyard gardens that grow food only for a family and not for sales! >	0	0	1	0	0	0	0	0	0	0	1	0	0	0	0	0	0	0	0	0	0	0	0	0	0	0	0	0	0	0	0	0	0	0	0	0	1	0	0	0
500	tron-01430	The Government is banning organic Farming	false	13	This bill will require organic farms to use specific > fertilizers and poisonous insect sprays dictated by the newly formed agency > to "make sure there is no danger to the public food supply".	There is an enormous rush to get > this into law within the next 2 weeks before people realize what is > happening.	> > <b> Main backer and lobbyist is Monsanto <b> - chemical and genetic engineering > giant corporation (and Cargill, ADM, and about 35 other related > agri-giants).	This will > include backyard gardens that grow food only for a family and not for sales! >	Scroll down for more details on the bill.	0	0	0	0	0	0	0	0	0	1	0	0	0	0	0	0	0	0	0	0	0	0	0	0	0	0	0	0	0	1	0	0	0	0	0	0	0	0	0	0
501	tron-01430	The Government is banning organic Farming	false	14	This will > include backyard gardens that grow food only for a family and not for sales! >	> > <b> Main backer and lobbyist is Monsanto <b> - chemical and genetic engineering > giant corporation (and Cargill, ADM, and about 35 other related > agri-giants).	This bill will require organic farms to use specific > fertilizers and poisonous insect sprays dictated by the newly formed agency > to "make sure there is no danger to the public food supply".	Scroll down for more details on the bill.	> Scroll down for WHAT YOU CAN DO. >	0	0	0	0	0	0	0	0	0	0	0	0	0	0	0	0	0	0	0	0	0	0	0	0	0	0	0	0	0	0	0	0	0	0	0	0	0	0	0	0
502	tron-01430	The Government is banning organic Farming	false	15	Scroll down for more details on the bill.	This bill will require organic farms to use specific > fertilizers and poisonous insect sprays dictated by the newly formed agency > to "make sure there is no danger to the public food supply".	This will > include backyard gardens that grow food only for a family and not for sales! >	> Scroll down for WHAT YOU CAN DO. >	If this passes then NO more heirloom clean seeds but only Monsanto > genetically altered seeds that are now showing up with unexpected diseases > in humans.	0	0	0	0	0	0	0	0	0	0	0	0	0	0	0	0	0	0	0	0	0	0	0	0	0	0	0	0	0	0	0	0	0	0	0	0	0	0	0	0
503	tron-01430	The Government is banning organic Farming	false	16	> Scroll down for WHAT YOU CAN DO. >	This will > include backyard gardens that grow food only for a family and not for sales! >	Scroll down for more details on the bill.	If this passes then NO more heirloom clean seeds but only Monsanto > genetically altered seeds that are now showing up with unexpected diseases > in humans.	The name on this outrageous food plan is: > Food Safety Modernization Act of 2009 (bill HR 875).	0	0	0	0	0	0	0	0	0	0	1	0	0	0	0	0	0	0	0	0	0	0	0	0	0	0	0	0	0	0	0	0	0	1	0	0	0	0	0	0
504	tron-01430	The Government is banning organic Farming	false	17	If this passes then NO more heirloom clean seeds but only Monsanto > genetically altered seeds that are now showing up with unexpected diseases > in humans.	Scroll down for more details on the bill.	> Scroll down for WHAT YOU CAN DO. >	The name on this outrageous food plan is: > Food Safety Modernization Act of 2009 (bill HR 875).	> >	0	0	0	0	1	0	0	0	0	0	1	0	0	0	0	0	0	0	0	0	0	0	0	0	0	0	0	0	0	0	0	0	0	0	0	0	0	0	0	0
505	tron-01430	The Government is banning organic Farming	false	18	The name on this outrageous food plan is: > Food Safety Modernization Act of 2009 (bill HR 875).	> Scroll down for WHAT YOU CAN DO. >	If this passes then NO more heirloom clean seeds but only Monsanto > genetically altered seeds that are now showing up with unexpected diseases > in humans.	> >	THIS IS REAL, FOLKS! >	0	0	0	0	0	0	0	0	0	0	0	0	0	0	0	0	0	0	0	0	0	0	0	0	0	0	0	0	0	0	0	0	0	0	0	0	0	0	0	0
506	tron-01430	The Government is banning organic Farming	false	19	> >	If this passes then NO more heirloom clean seeds but only Monsanto > genetically altered seeds that are now showing up with unexpected diseases > in humans.	The name on this outrageous food plan is: > Food Safety Modernization Act of 2009 (bill HR 875).	THIS IS REAL, FOLKS! >	** PASS THIS ALONG TO ALL CONCERNED ON YOUR > MAILING LISTS & > *	0	0	0	0	0	0	0	0	0	0	0	0	0	0	0	0	0	0	0	0	0	0	0	0	0	0	0	0	0	0	0	0	0	0	0	0	0	0	0	0
507	tron-01430	The Government is banning organic Farming	false	20	THIS IS REAL, FOLKS! >	The name on this outrageous food plan is: > Food Safety Modernization Act of 2009 (bill HR 875).	> >	** PASS THIS ALONG TO ALL CONCERNED ON YOUR > MAILING LISTS & > *	* CALL YOUR SENATE REPRESENTATIVES TODAY!	0	0	0	0	0	0	0	0	0	0	1	0	0	0	0	0	0	0	0	0	0	0	0	0	0	0	0	0	0	0	0	0	0	1	0	0	0	0	0	0
508	tron-01430	The Government is banning organic Farming	false	21	** PASS THIS ALONG TO ALL CONCERNED ON YOUR > MAILING LISTS & > *	> >	THIS IS REAL, FOLKS! >	* CALL YOUR SENATE REPRESENTATIVES TODAY!	> >	0	0	0	0	0	0	0	0	0	0	1	1	0	0	0	0	0	0	0	0	0	0	0	0	0	0	0	0	0	0	0	0	0	1	0	0	0	0	0	0
509	tron-01430	The Government is banning organic Farming	false	22	* CALL YOUR SENATE REPRESENTATIVES TODAY!	THIS IS REAL, FOLKS! >	** PASS THIS ALONG TO ALL CONCERNED ON YOUR > MAILING LISTS & > *	> >	Get on that phone and burn up the wires.	0	0	0	0	0	0	0	0	0	0	1	1	0	0	0	0	0	0	0	0	0	0	0	0	0	0	0	0	0	0	0	0	0	1	0	0	0	0	0	0
510	tron-01430	The Government is banning organic Farming	false	23	> >	** PASS THIS ALONG TO ALL CONCERNED ON YOUR > MAILING LISTS & > *	* CALL YOUR SENATE REPRESENTATIVES TODAY!	Get on that phone and burn up the wires.	Get anyone else you can to do the > same thing.	0	0	0	0	0	0	0	0	0	0	0	0	0	0	0	0	0	0	0	0	0	0	0	0	0	0	0	0	0	0	0	0	0	0	0	0	0	0	0	0
511	tron-01430	The Government is banning organic Farming	false	24	Get on that phone and burn up the wires.	* CALL YOUR SENATE REPRESENTATIVES TODAY!	> >	Get anyone else you can to do the > same thing.	>	0	0	0	0	0	0	0	0	0	0	0	0	0	0	0	0	0	0	0	0	0	0	0	0	0	0	0	0	0	0	0	0	0	0	0	0	0	0	0	0
512	tron-01430	The Government is banning organic Farming	false	25	Get anyone else you can to do the > same thing.	> >	Get on that phone and burn up the wires.	>	The House and Senate WILL pass this if they are not massively threatened > with loss of their position....	0	0	0	0	0	0	0	0	0	0	0	0	0	0	0	0	0	0	0	0	0	0	0	0	0	0	0	0	0	0	0	0	0	0	0	0	0	0	0	0
513	tron-01430	The Government is banning organic Farming	false	26	>	Get on that phone and burn up the wires.	Get anyone else you can to do the > same thing.	The House and Senate WILL pass this if they are not massively threatened > with loss of their position....	They only fear your voice and your vote.	0	0	0	0	0	0	0	0	0	0	0	0	0	0	0	0	0	0	0	0	0	0	0	0	0	0	0	0	0	0	0	0	0	0	0	0	0	0	0	0
514	tron-01430	The Government is banning organic Farming	false	27	The House and Senate WILL pass this if they are not massively threatened > with loss of their position....	Get anyone else you can to do the > same thing.	>	They only fear your voice and your vote.	> >	0	0	0	0	0	0	0	0	0	0	1	0	0	0	0	0	0	0	0	0	0	0	0	0	0	0	0	0	0	0	0	0	0	0	0	0	0	1	0	0
515	tron-01430	The Government is banning organic Farming	false	28	They only fear your voice and your vote.	>	The House and Senate WILL pass this if they are not massively threatened > with loss of their position....	> >	** BEST THING TO DO is go to www.house.gov/writerep all you have to do is > put in your zip and it will give you your congressperson and how to get in > touch with them.	0	0	0	0	0	0	0	0	0	0	0	0	0	0	0	0	0	0	0	0	0	0	0	0	0	0	0	0	0	0	0	0	0	0	0	0	0	0	0	0
516	tron-01430	The Government is banning organic Farming	false	29	> >	The House and Senate WILL pass this if they are not massively threatened > with loss of their position....	They only fear your voice and your vote.	** BEST THING TO DO is go to www.house.gov/writerep all you have to do is > put in your zip and it will give you your congressperson and how to get in > touch with them.	When you call their office someone will answer the phone, > just tell them (politely) that you are calling to express your views on HR > 875. >	0	0	0	0	0	0	0	0	0	0	0	0	0	0	0	0	0	0	0	0	0	0	0	0	0	0	0	0	0	0	0	0	0	0	0	0	0	0	0	0
517	tron-01430	The Government is banning organic Farming	false	30	** BEST THING TO DO is go to www.house.gov/writerep all you have to do is > put in your zip and it will give you your congressperson and how to get in > touch with them.	They only fear your voice and your vote.	> >	When you call their office someone will answer the phone, > just tell them (politely) that you are calling to express your views on HR > 875. >	Tell them your views, they'll take your name and address and pass your > comments along to the congressperson.	0	0	0	0	0	0	0	0	0	0	1	1	0	0	0	0	0	0	0	0	0	0	0	0	0	0	0	0	0	0	0	0	0	1	0	0	0	0	0	0
518	tron-01430	The Government is banning organic Farming	false	31	When you call their office someone will answer the phone, > just tell them (politely) that you are calling to express your views on HR > 875. >	> >	** BEST THING TO DO is go to www.house.gov/writerep all you have to do is > put in your zip and it will give you your congressperson and how to get in > touch with them.	Tell them your views, they'll take your name and address and pass your > comments along to the congressperson.	> >	0	0	0	0	0	0	0	0	0	0	0	1	0	0	0	0	0	0	0	0	0	0	0	0	0	0	0	0	0	0	0	0	0	0	0	0	0	0	0	0
519	tron-01430	The Government is banning organic Farming	false	32	Tell them your views, they'll take your name and address and pass your > comments along to the congressperson.	** BEST THING TO DO is go to www.house.gov/writerep all you have to do is > put in your zip and it will give you your congressperson and how to get in > touch with them.	When you call their office someone will answer the phone, > just tell them (politely) that you are calling to express your views on HR > 875. >	> >	The following link is a list of the U.S. senators and their contact info: > http://www.senate.gov/general/contact_information/senators_cfm.cfm > > Thank you for your time > peace, love and participation for change!	0	0	0	0	0	0	0	0	0	0	0	1	0	0	0	0	0	0	0	0	0	0	0	0	0	0	0	0	0	0	0	0	0	0	0	0	0	0	0	0
520	tron-01430	The Government is banning organic Farming	false	33	> >	When you call their office someone will answer the phone, > just tell them (politely) that you are calling to express your views on HR > 875. >	Tell them your views, they'll take your name and address and pass your > comments along to the congressperson.	The following link is a list of the U.S. senators and their contact info: > http://www.senate.gov/general/contact_information/senators_cfm.cfm > > Thank you for your time > peace, love and participation for change!	🙂 > tewa > >	0	0	0	0	0	0	0	0	0	0	0	1	0	0	0	0	0	0	0	0	0	0	0	0	0	0	0	0	0	0	0	0	0	0	0	0	0	0	0	0
521	tron-01430	The Government is banning organic Farming	false	34	The following link is a list of the U.S. senators and their contact info: > http://www.senate.gov/general/contact_information/senators_cfm.cfm > > Thank you for your time > peace, love and participation for change!	Tell them your views, they'll take your name and address and pass your > comments along to the congressperson.	> >	🙂 > tewa > >	Here's another link with more info: >	0	0	0	0	0	0	0	0	0	0	0	1	0	0	0	0	0	0	0	0	0	0	0	0	0	0	0	0	0	0	0	0	0	0	0	0	0	0	0	0
522	tron-01430	The Government is banning organic Farming	false	35	🙂 > tewa > >	> >	The following link is a list of the U.S. senators and their contact info: > http://www.senate.gov/general/contact_information/senators_cfm.cfm > > Thank you for your time > peace, love and participation for change!	Here's another link with more info: >	http://www.campaignforliberty.com/blog.php?view=12671 >	0	0	0	0	0	0	0	0	0	0	0	1	0	0	0	0	0	0	0	0	0	0	0	0	0	0	0	0	0	0	0	0	0	0	0	0	0	0	0	0
523	tron-01430	The Government is banning organic Farming	false	36	Here's another link with more info: >	The following link is a list of the U.S. senators and their contact info: > http://www.senate.gov/general/contact_information/senators_cfm.cfm > > Thank you for your time > peace, love and participation for change!	🙂 > tewa > >	http://www.campaignforliberty.com/blog.php?view=12671 >	HR 875 The food police, criminalizing organic farming and the backyard > gardener, and violation of the 10th amendment > >	0	0	0	0	0	0	0	0	0	0	0	1	0	0	0	0	0	0	0	0	0	0	0	0	0	0	0	0	0	0	0	0	0	0	0	0	0	0	0	0
524	tron-01430	The Government is banning organic Farming	false	37	http://www.campaignforliberty.com/blog.php?view=12671 >	🙂 > tewa > >	Here's another link with more info: >	HR 875 The food police, criminalizing organic farming and the backyard > gardener, and violation of the 10th amendment > >	HR 875 is being steamrolled thru the House and we have to pick up the pace!	0	0	0	0	0	0	0	0	0	0	0	1	0	0	0	0	0	0	0	0	0	0	0	0	0	0	0	0	0	0	0	0	0	0	0	0	0	0	0	0
525	tron-01430	The Government is banning organic Farming	false	38	HR 875 The food police, criminalizing organic farming and the backyard > gardener, and violation of the 10th amendment > >	Here's another link with more info: >	http://www.campaignforliberty.com/blog.php?view=12671 >	HR 875 is being steamrolled thru the House and we have to pick up the pace!	>	0	0	0	0	0	0	0	0	0	0	0	0	0	0	0	0	0	0	0	0	0	0	0	0	0	0	0	0	0	0	0	0	0	0	0	0	0	0	0	0
526	tron-01430	The Government is banning organic Farming	false	39	HR 875 is being steamrolled thru the House and we have to pick up the pace!	http://www.campaignforliberty.com/blog.php?view=12671 >	HR 875 The food police, criminalizing organic farming and the backyard > gardener, and violation of the 10th amendment > >	>	HR 875 > http://thomas.loc.gov/cgi-bin/query/F?c111:1:./temp/~c1112RD9bb:e11439: > >	0	0	0	0	0	0	0	0	0	0	0	0	0	0	0	0	0	0	0	0	0	0	0	0	0	0	0	0	0	0	0	0	0	0	0	0	0	0	0	0
527	tron-01430	The Government is banning organic Farming	false	40	>	HR 875 The food police, criminalizing organic farming and the backyard > gardener, and violation of the 10th amendment > >	HR 875 is being steamrolled thru the House and we have to pick up the pace!	HR 875 > http://thomas.loc.gov/cgi-bin/query/F?c111:1:./temp/~c1112RD9bb:e11439: > >	This bill is sitting in committee and I am not sure when it is going to hit > the floor.	0	0	0	0	0	0	0	0	0	0	0	0	0	0	0	0	0	0	0	0	0	0	0	0	0	0	0	0	0	0	0	0	0	0	0	0	0	0	0	0
528	tron-01430	The Government is banning organic Farming	false	41	HR 875 > http://thomas.loc.gov/cgi-bin/query/F?c111:1:./temp/~c1112RD9bb:e11439: > >	HR 875 is being steamrolled thru the House and we have to pick up the pace!	>	This bill is sitting in committee and I am not sure when it is going to hit > the floor.	One thing I do know is that very few of the Representatives have > read it.	0	0	0	0	0	0	0	0	0	0	0	0	0	0	0	0	0	0	0	0	0	0	0	0	0	0	0	0	0	0	0	0	0	0	0	0	0	0	0	0
529	tron-01430	The Government is banning organic Farming	false	42	This bill is sitting in committee and I am not sure when it is going to hit > the floor.	>	HR 875 > http://thomas.loc.gov/cgi-bin/query/F?c111:1:./temp/~c1112RD9bb:e11439: > >	One thing I do know is that very few of the Representatives have > read it.	As usual they will vote on this based on what someone else is > saying.	0	0	0	0	0	0	0	0	0	0	0	0	0	0	0	0	0	0	0	0	0	0	0	0	0	0	0	0	0	0	0	0	0	0	0	0	0	0	0	0
530	tron-01430	The Government is banning organic Farming	false	43	One thing I do know is that very few of the Representatives have > read it.	HR 875 > http://thomas.loc.gov/cgi-bin/query/F?c111:1:./temp/~c1112RD9bb:e11439: > >	This bill is sitting in committee and I am not sure when it is going to hit > the floor.	As usual they will vote on this based on what someone else is > saying.	Urge your members to read the legislation and ask for opposition to > this devastating legislation.	0	0	0	0	0	0	0	0	0	0	0	0	0	0	0	0	0	0	0	0	0	0	0	0	0	0	0	0	0	0	0	0	0	0	0	0	0	0	0	0
531	tron-01430	The Government is banning organic Farming	false	44	As usual they will vote on this based on what someone else is > saying.	This bill is sitting in committee and I am not sure when it is going to hit > the floor.	One thing I do know is that very few of the Representatives have > read it.	Urge your members to read the legislation and ask for opposition to > this devastating legislation.	Devastating for everyday folks but great for > factory farming ops like Monsanto, ADM, Sodexo and Tyson to name a few. > >	0	0	0	0	0	0	0	0	0	0	0	0	0	0	0	0	0	0	0	0	0	0	0	0	0	0	0	0	0	0	0	0	0	0	0	0	0	0	0	0
532	tron-01430	The Government is banning organic Farming	false	45	Urge your members to read the legislation and ask for opposition to > this devastating legislation.	One thing I do know is that very few of the Representatives have > read it.	As usual they will vote on this based on what someone else is > saying.	Devastating for everyday folks but great for > factory farming ops like Monsanto, ADM, Sodexo and Tyson to name a few. > >	I have no doubt that this legislation was heavily influenced by lobbyists > from huge food producers.	0	0	0	0	0	0	0	0	0	0	0	1	0	0	0	0	0	0	0	0	0	0	0	0	0	0	0	0	0	0	0	0	0	0	0	0	0	0	0	0
533	tron-01430	The Government is banning organic Farming	false	46	Devastating for everyday folks but great for > factory farming ops like Monsanto, ADM, Sodexo and Tyson to name a few. > >	As usual they will vote on this based on what someone else is > saying.	Urge your members to read the legislation and ask for opposition to > this devastating legislation.	I have no doubt that this legislation was heavily influenced by lobbyists > from huge food producers.	This legislation is so broad based that > technically someone with a little backyard garden could get fined and have >	0	0	1	0	0	0	0	0	0	0	0	1	0	0	0	0	0	0	0	0	0	0	0	0	0	0	0	0	0	0	0	0	0	0	0	0	0	0	0	0
534	tron-01430	The Government is banning organic Farming	false	47	I have no doubt that this legislation was heavily influenced by lobbyists > from huge food producers.	Urge your members to read the legislation and ask for opposition to > this devastating legislation.	Devastating for everyday folks but great for > factory farming ops like Monsanto, ADM, Sodexo and Tyson to name a few. > >	This legislation is so broad based that > technically someone with a little backyard garden could get fined and have >	their property siezed.	0	0	1	0	0	0	0	0	0	0	0	0	0	0	0	0	0	0	0	0	0	0	0	0	0	0	0	0	0	0	0	0	0	0	0	0	0	0	0	0
535	tron-01430	The Government is banning organic Farming	false	48	This legislation is so broad based that > technically someone with a little backyard garden could get fined and have >	Devastating for everyday folks but great for > factory farming ops like Monsanto, ADM, Sodexo and Tyson to name a few. > >	I have no doubt that this legislation was heavily influenced by lobbyists > from huge food producers.	their property siezed.	It will effect anyone who produces food even if they > do not sell but only consume it.	0	0	1	0	0	0	0	0	0	0	0	0	0	0	0	0	0	0	0	0	0	0	0	0	0	0	0	0	0	0	0	0	0	0	0	0	0	0	0	0
536	tron-01430	The Government is banning organic Farming	false	49	their property siezed.	I have no doubt that this legislation was heavily influenced by lobbyists > from huge food producers.	This legislation is so broad based that > technically someone with a little backyard garden could get fined and have >	It will effect anyone who produces food even if they > do not sell but only consume it.	It will literally put all independent > farmers and food producers out of business due to the huge amounts of money > it will take to conform to factory farming methods.	0	0	0	0	0	0	0	0	0	0	0	0	0	0	0	0	0	0	0	0	0	0	0	0	0	0	0	0	0	0	0	0	0	0	0	0	0	0	0	0
537	tron-01430	The Government is banning organic Farming	false	50	It will effect anyone who produces food even if they > do not sell but only consume it.	This legislation is so broad based that > technically someone with a little backyard garden could get fined and have >	their property siezed.	It will literally put all independent > farmers and food producers out of business due to the huge amounts of money > it will take to conform to factory farming methods.	If people choose to farm > without industry standards such as chemical pesticides and fertilizers they > will be subject to a vareity of harassment from this completely new agency > that has never before existed.	0	0	0	0	0	0	0	0	0	0	0	0	0	0	0	0	0	0	0	0	0	0	0	0	0	0	0	0	0	0	0	0	0	0	0	0	0	0	0	0
538	tron-01430	The Government is banning organic Farming	false	51	It will literally put all independent > farmers and food producers out of business due to the huge amounts of money > it will take to conform to factory farming methods.	their property siezed.	It will effect anyone who produces food even if they > do not sell but only consume it.	If people choose to farm > without industry standards such as chemical pesticides and fertilizers they > will be subject to a vareity of harassment from this completely new agency > that has never before existed.	That's right, a whole new government agency > is being created just to police food, for our own protection of course. > > DO NOT TAKE MY WORD FOR IT, READ THIS LEGISLATION FOR YOURSELF.	0	0	0	0	0	0	0	0	0	0	0	0	0	0	0	0	0	0	0	0	0	0	0	0	0	0	0	0	0	0	0	0	0	0	0	0	0	0	0	0
539	tron-01430	The Government is banning organic Farming	false	52	If people choose to farm > without industry standards such as chemical pesticides and fertilizers they > will be subject to a vareity of harassment from this completely new agency > that has never before existed.	It will effect anyone who produces food even if they > do not sell but only consume it.	It will literally put all independent > farmers and food producers out of business due to the huge amounts of money > it will take to conform to factory farming methods.	That's right, a whole new government agency > is being created just to police food, for our own protection of course. > > DO NOT TAKE MY WORD FOR IT, READ THIS LEGISLATION FOR YOURSELF.	The more > people who read this legislation the more insight we are going to get and be > able to share.	0	0	0	0	0	0	0	0	0	0	0	0	0	0	0	0	0	0	0	0	0	0	0	0	0	0	0	0	0	0	0	0	0	0	0	0	0	0	0	0
540	tron-01430	The Government is banning organic Farming	false	53	That's right, a whole new government agency > is being created just to police food, for our own protection of course. > > DO NOT TAKE MY WORD FOR IT, READ THIS LEGISLATION FOR YOURSELF.	It will literally put all independent > farmers and food producers out of business due to the huge amounts of money > it will take to conform to factory farming methods.	If people choose to farm > without industry standards such as chemical pesticides and fertilizers they > will be subject to a vareity of harassment from this completely new agency > that has never before existed.	The more > people who read this legislation the more insight we are going to get and be > able to share.	Post your observations and insights below.	0	0	0	0	0	0	0	0	0	0	1	0	0	0	0	0	0	0	0	0	0	0	0	0	0	0	0	0	0	0	0	0	0	1	0	0	0	0	0	0
541	tron-01430	The Government is banning organic Farming	false	54	The more > people who read this legislation the more insight we are going to get and be > able to share.	If people choose to farm > without industry standards such as chemical pesticides and fertilizers they > will be subject to a vareity of harassment from this completely new agency > that has never before existed.	That's right, a whole new government agency > is being created just to police food, for our own protection of course. > > DO NOT TAKE MY WORD FOR IT, READ THIS LEGISLATION FOR YOURSELF.	Post your observations and insights below.	Urge your members > to read this legislation and to oppose the passage of this legislation.	0	0	0	0	0	0	0	0	0	0	1	0	0	0	0	0	0	0	0	0	0	0	0	0	0	0	0	0	0	0	0	0	0	1	0	0	0	0	0	0
542	tron-01430	The Government is banning organic Farming	false	55	Post your observations and insights below.	That's right, a whole new government agency > is being created just to police food, for our own protection of course. > > DO NOT TAKE MY WORD FOR IT, READ THIS LEGISLATION FOR YOURSELF.	The more > people who read this legislation the more insight we are going to get and be > able to share.	Urge your members > to read this legislation and to oppose the passage of this legislation.	> > Pay special attention to > > *	0	0	0	0	0	0	0	0	0	0	0	0	0	0	0	0	0	0	0	0	0	0	0	0	0	0	0	0	0	0	0	0	0	0	0	0	0	0	0	0
543	tron-01430	The Government is banning organic Farming	false	56	Urge your members > to read this legislation and to oppose the passage of this legislation.	The more > people who read this legislation the more insight we are going to get and be > able to share.	Post your observations and insights below.	> > Pay special attention to > > *	Section 3 which is the definitions portion of the bill-read in it's > entirety.	0	0	0	0	0	0	0	0	0	0	0	1	0	0	0	0	0	0	0	0	0	0	0	0	0	0	0	0	0	0	0	0	0	0	0	0	0	0	0	0
544	tron-01430	The Government is banning organic Farming	false	57	> > Pay special attention to > > *	Post your observations and insights below.	Urge your members > to read this legislation and to oppose the passage of this legislation.	Section 3 which is the definitions portion of the bill-read in it's > entirety.	> * section 103, 206 and 207- read in it's entirety.	0	0	0	0	0	0	0	0	0	0	0	0	0	0	0	0	0	0	0	0	0	0	0	0	0	0	0	0	0	0	0	0	0	0	0	0	0	0	0	0
545	tron-01430	The Government is banning organic Farming	false	58	Section 3 which is the definitions portion of the bill-read in it's > entirety.	Urge your members > to read this legislation and to oppose the passage of this legislation.	> > Pay special attention to > > *	> * section 103, 206 and 207- read in it's entirety.	> > Red flags I found and I am sure there are more........... > >	0	0	0	0	0	0	0	0	0	0	0	0	0	0	0	0	0	0	0	0	0	0	0	0	0	0	0	0	0	0	0	0	0	0	0	0	0	0	0	0
546	tron-01430	The Government is banning organic Farming	false	59	> * section 103, 206 and 207- read in it's entirety.	> > Pay special attention to > > *	Section 3 which is the definitions portion of the bill-read in it's > entirety.	> > Red flags I found and I am sure there are more........... > >	* Legally binds state agriculture depts to enforcing federal guidelines > effectively taking away the states power to do anything other than being > food police for the federal dept. >	0	0	0	0	0	0	0	0	0	0	0	0	0	0	0	0	0	0	0	0	0	0	0	0	0	0	0	0	0	0	0	0	0	0	0	0	0	0	0	0
547	tron-01430	The Government is banning organic Farming	false	60	> > Red flags I found and I am sure there are more........... > >	Section 3 which is the definitions portion of the bill-read in it's > entirety.	> * section 103, 206 and 207- read in it's entirety.	* Legally binds state agriculture depts to enforcing federal guidelines > effectively taking away the states power to do anything other than being > food police for the federal dept. >	* Effectively criminalizes organic farming but doesn't actually use the word > organic.	0	0	0	0	0	0	1	0	0	0	0	0	0	0	0	0	0	0	0	0	0	0	0	0	0	0	0	0	0	0	0	0	0	0	0	0	0	0	0	0
548	tron-01430	The Government is banning organic Farming	false	61	* Legally binds state agriculture depts to enforcing federal guidelines > effectively taking away the states power to do anything other than being > food police for the federal dept. >	> * section 103, 206 and 207- read in it's entirety.	> > Red flags I found and I am sure there are more........... > >	* Effectively criminalizes organic farming but doesn't actually use the word > organic.	>	0	0	0	0	0	0	1	0	0	0	0	0	0	0	0	0	0	0	0	0	0	0	0	0	0	0	0	0	0	0	0	0	0	0	0	0	0	0	0	0
549	tron-01430	The Government is banning organic Farming	false	62	* Effectively criminalizes organic farming but doesn't actually use the word > organic.	> > Red flags I found and I am sure there are more........... > >	* Legally binds state agriculture depts to enforcing federal guidelines > effectively taking away the states power to do anything other than being > food police for the federal dept. >	>	*	0	0	0	0	0	0	1	0	0	0	0	0	0	0	0	0	0	0	0	0	0	0	0	0	0	0	0	0	0	0	0	0	0	0	0	0	0	0	0	0
550	tron-01430	The Government is banning organic Farming	false	63	>	* Legally binds state agriculture depts to enforcing federal guidelines > effectively taking away the states power to do anything other than being > food police for the federal dept. >	* Effectively criminalizes organic farming but doesn't actually use the word > organic.	*	Effects anyone growing food even if they are not selling it but consuming > it.	0	0	0	0	0	0	1	0	0	0	0	0	0	0	0	0	0	0	0	0	0	0	0	0	0	0	0	0	0	0	0	0	0	0	0	0	0	0	0	0
551	tron-01430	The Government is banning organic Farming	false	64	*	* Effectively criminalizes organic farming but doesn't actually use the word > organic.	>	Effects anyone growing food even if they are not selling it but consuming > it.	> * Effects anyone producing meat of any kind including wild game.	0	0	0	0	0	0	1	0	0	0	0	0	0	0	0	0	0	0	0	0	0	0	0	0	0	0	0	0	0	0	0	0	0	0	0	0	0	0	0	0
552	tron-01430	The Government is banning organic Farming	false	65	Effects anyone growing food even if they are not selling it but consuming > it.	>	*	> * Effects anyone producing meat of any kind including wild game.	> *	0	0	0	0	0	0	1	0	0	0	0	0	0	0	0	0	0	0	0	0	0	0	0	0	0	0	0	0	0	0	0	0	0	0	0	0	0	0	0	0
553	tron-01430	The Government is banning organic Farming	false	66	> * Effects anyone producing meat of any kind including wild game.	*	Effects anyone growing food even if they are not selling it but consuming > it.	> *	Legislation is so broad based that every aspect of growing or producing > food can be made illegal.	0	0	0	0	0	0	1	0	0	0	0	0	0	0	0	0	0	0	0	0	0	0	0	0	0	0	0	0	0	0	0	0	0	0	0	0	0	0	0	0
554	tron-01430	The Government is banning organic Farming	false	67	> *	Effects anyone growing food even if they are not selling it but consuming > it.	> * Effects anyone producing meat of any kind including wild game.	Legislation is so broad based that every aspect of growing or producing > food can be made illegal.	There are no specifics which is bizarre > considering how long the legislation is.	0	0	0	0	0	0	1	0	0	0	0	0	0	0	0	0	0	0	0	0	0	0	0	0	0	0	0	0	0	0	0	0	0	0	0	0	0	0	0	0
555	tron-01430	The Government is banning organic Farming	false	68	Legislation is so broad based that every aspect of growing or producing > food can be made illegal.	> * Effects anyone producing meat of any kind including wild game.	> *	There are no specifics which is bizarre > considering how long the legislation is.	> *	0	0	0	0	0	0	1	0	0	0	0	0	0	0	0	0	0	0	0	0	0	0	0	0	0	0	0	0	0	0	0	0	0	0	0	0	0	0	0	0
556	tron-01430	The Government is banning organic Farming	false	69	There are no specifics which is bizarre > considering how long the legislation is.	> *	Legislation is so broad based that every aspect of growing or producing > food can be made illegal.	> *	Section 103 is almost entirely about the administrative aspect of the > legislation.	0	0	0	0	0	0	1	0	0	0	0	0	0	0	0	0	0	0	0	0	0	0	0	0	0	0	0	0	0	0	0	0	0	0	0	0	0	0	0	0
557	tron-01430	The Government is banning organic Farming	false	70	> *	Legislation is so broad based that every aspect of growing or producing > food can be made illegal.	There are no specifics which is bizarre > considering how long the legislation is.	Section 103 is almost entirely about the administrative aspect of the > legislation.	It will allow the appointing of officials from the factory > farming corporations and lobbyists and classify them as experts and allow > them to determine and interpret the legislation.	0	0	0	0	0	0	1	0	0	0	0	0	0	0	0	0	0	0	0	0	0	0	0	0	0	0	0	0	0	0	0	0	0	0	0	0	0	0	0	0
558	tron-01430	The Government is banning organic Farming	false	71	Section 103 is almost entirely about the administrative aspect of the > legislation.	There are no specifics which is bizarre > considering how long the legislation is.	> *	It will allow the appointing of officials from the factory > farming corporations and lobbyists and classify them as experts and allow > them to determine and interpret the legislation.	Who do you think they are > going to side with?	0	0	0	0	0	0	1	0	0	0	0	0	0	0	0	0	0	0	0	0	0	0	0	0	0	0	0	0	0	0	0	0	0	0	0	0	0	0	0	0
559	tron-01430	The Government is banning organic Farming	false	72	It will allow the appointing of officials from the factory > farming corporations and lobbyists and classify them as experts and allow > them to determine and interpret the legislation.	> *	Section 103 is almost entirely about the administrative aspect of the > legislation.	Who do you think they are > going to side with?	>	0	0	0	0	0	0	1	0	0	0	0	0	0	0	0	0	0	0	0	0	0	0	0	0	0	0	0	0	0	0	0	0	0	0	0	0	0	0	0	0
560	tron-01430	The Government is banning organic Farming	false	73	Who do you think they are > going to side with?	Section 103 is almost entirely about the administrative aspect of the > legislation.	It will allow the appointing of officials from the factory > farming corporations and lobbyists and classify them as experts and allow > them to determine and interpret the legislation.	>	*	0	0	0	0	0	0	1	0	0	0	0	1	0	0	0	0	0	0	0	0	0	0	0	0	0	0	0	0	0	0	0	0	0	0	0	0	0	0	0	1
561	tron-01430	The Government is banning organic Farming	false	74	>	It will allow the appointing of officials from the factory > farming corporations and lobbyists and classify them as experts and allow > them to determine and interpret the legislation.	Who do you think they are > going to side with?	*	Section 206 defines what will be considered a food production facility and >	0	0	0	0	0	0	1	0	0	0	0	0	0	0	0	0	0	0	0	0	0	0	0	0	0	0	0	0	0	0	0	0	0	0	0	0	0	0	0	0
562	tron-01430	The Government is banning organic Farming	false	75	*	Who do you think they are > going to side with?	>	Section 206 defines what will be considered a food production facility and >	what will be enforced up all food production facilities.	0	0	0	0	0	0	1	0	0	0	0	0	0	0	0	0	0	0	0	0	0	0	0	0	0	0	0	0	0	0	0	0	0	0	0	0	0	0	0	0
563	tron-01430	The Government is banning organic Farming	false	76	Section 206 defines what will be considered a food production facility and >	>	*	what will be enforced up all food production facilities.	The wording is so > broad based that a backyard gardener could be fined and more.	0	0	0	0	0	0	1	0	0	0	0	0	0	0	0	0	0	0	0	0	0	0	0	0	0	0	0	0	0	0	0	0	0	0	0	0	0	0	0	0
564	tron-01430	The Government is banning organic Farming	false	77	what will be enforced up all food production facilities.	*	Section 206 defines what will be considered a food production facility and >	The wording is so > broad based that a backyard gardener could be fined and more.	> *	0	0	0	0	0	0	1	0	0	0	0	0	0	0	0	0	0	0	0	0	0	0	0	0	0	0	0	0	0	0	0	0	0	0	0	0	0	0	0	0
565	tron-01430	The Government is banning organic Farming	false	78	The wording is so > broad based that a backyard gardener could be fined and more.	Section 206 defines what will be considered a food production facility and >	what will be enforced up all food production facilities.	> *	Section 207 requires that the state's agriculture dept act as the food > police and enforce the federal requirements.	0	0	0	0	0	0	1	0	0	0	0	0	0	0	0	0	0	0	0	0	0	0	0	0	0	0	0	0	0	0	0	0	0	0	0	0	0	0	0	0
566	tron-01430	The Government is banning organic Farming	false	79	> *	what will be enforced up all food production facilities.	The wording is so > broad based that a backyard gardener could be fined and more.	Section 207 requires that the state's agriculture dept act as the food > police and enforce the federal requirements.	This takes away the states > power and is in violation of the 10th amendment.	0	0	0	0	0	0	1	0	0	0	0	0	0	0	0	0	0	0	0	0	0	0	0	0	0	0	0	0	0	0	0	0	0	0	0	0	0	0	0	0
567	tron-01430	The Government is banning organic Farming	false	80	Section 207 requires that the state's agriculture dept act as the food > police and enforce the federal requirements.	The wording is so > broad based that a backyard gardener could be fined and more.	> *	This takes away the states > power and is in violation of the 10th amendment.	> *	0	0	0	0	0	0	1	0	0	0	0	0	0	0	0	0	0	0	0	0	0	0	0	0	0	0	0	0	0	0	0	0	0	0	0	0	0	0	0	0
568	tron-01430	The Government is banning organic Farming	false	81	This takes away the states > power and is in violation of the 10th amendment.	> *	Section 207 requires that the state's agriculture dept act as the food > police and enforce the federal requirements.	> *	There are many more but by the time I got this far in the legislation I > was so alarmed that I wanted to bring someone's attention to it.	0	0	0	0	0	0	1	0	0	0	0	0	0	0	0	0	0	0	0	0	0	0	0	0	0	0	0	0	0	0	0	0	0	0	0	0	0	0	0	0
569	tron-01430	The Government is banning organic Farming	false	82	> *	Section 207 requires that the state's agriculture dept act as the food > police and enforce the federal requirements.	This takes away the states > power and is in violation of the 10th amendment.	There are many more but by the time I got this far in the legislation I > was so alarmed that I wanted to bring someone's attention to it.	----------------------------- We will be following this closely and update you all on the news!!	0	0	0	0	0	0	0	0	0	0	0	0	0	0	0	0	0	0	0	0	0	0	0	0	0	0	0	0	0	0	0	0	0	0	0	0	0	0	0	0
570	tron-01430	The Government is banning organic Farming	false	83	There are many more but by the time I got this far in the legislation I > was so alarmed that I wanted to bring someone's attention to it.	This takes away the states > power and is in violation of the 10th amendment.	> *	----------------------------- We will be following this closely and update you all on the news!!	Please leave your comments below and show your support !!	0	0	0	0	0	0	0	0	0	0	0	0	0	0	0	0	0	0	0	0	0	0	0	0	0	0	0	0	0	0	0	0	0	0	0	0	0	0	0	0
571	tron-01430	The Government is banning organic Farming	false	84	----------------------------- We will be following this closely and update you all on the news!!	> *	There are many more but by the time I got this far in the legislation I > was so alarmed that I wanted to bring someone's attention to it.	Please leave your comments below and show your support !!		0	0	0	0	0	0	0	0	0	0	1	0	0	0	0	0	0	0	0	0	0	0	0	0	0	0	0	0	0	0	0	0	0	0	0	0	0	1	0	0
572	tron-01430	The Government is banning organic Farming	false	85	Please leave your comments below and show your support !!	There are many more but by the time I got this far in the legislation I > was so alarmed that I wanted to bring someone's attention to it.	----------------------------- We will be following this closely and update you all on the news!!			0	0	0	0	0	0	0	0	0	0	1	1	0	0	0	0	0	0	0	0	0	0	0	0	0	0	0	0	0	0	0	0	0	0	0	0	0	1	0	0
573	tron-02266	“Beezing” Trend Among Teens	true	0	'Beezing' trend swarming through CHS student body By Noah Salzberg, Online Features Editor April 30, 2014			A new phenomenon has spread through the halls of CHS like wildfire, and this new trend is unlike many others.	Simply put, it involves Burt's Bees Peppermint lip balm.	0	0	0	0	0	0	0	0	0	0	0	0	0	0	0	0	0	0	0	0	0	0	0	0	0	0	0	0	0	0	0	0	0	0	0	0	0	0	0	0
574	tron-02266	“Beezing” Trend Among Teens	true	1	A new phenomenon has spread through the halls of CHS like wildfire, and this new trend is unlike many others.		'Beezing' trend swarming through CHS student body By Noah Salzberg, Online Features Editor April 30, 2014	Simply put, it involves Burt's Bees Peppermint lip balm.	"Beezing," as it is called, is to spread Burt's Bees peppermint lip balm on one's eyelids to obtain a weird yet enticing sensation.	0	0	0	0	0	0	0	0	0	0	0	0	0	0	0	0	0	0	0	0	0	0	0	0	0	0	0	0	0	0	0	0	0	0	0	0	0	0	0	0
575	tron-02266	“Beezing” Trend Among Teens	true	2	Simply put, it involves Burt's Bees Peppermint lip balm.	'Beezing' trend swarming through CHS student body By Noah Salzberg, Online Features Editor April 30, 2014	A new phenomenon has spread through the halls of CHS like wildfire, and this new trend is unlike many others.	"Beezing," as it is called, is to spread Burt's Bees peppermint lip balm on one's eyelids to obtain a weird yet enticing sensation.	"When you beeze, it's like your eyes are eating a York peppermint patty," senior Dilan Hettiarachchi said.	0	0	0	0	0	0	0	0	0	0	0	0	0	0	0	0	0	0	0	0	0	0	0	0	0	0	0	0	0	0	0	0	0	0	0	0	0	0	0	0
576	tron-02266	“Beezing” Trend Among Teens	true	3	"Beezing," as it is called, is to spread Burt's Bees peppermint lip balm on one's eyelids to obtain a weird yet enticing sensation.	A new phenomenon has spread through the halls of CHS like wildfire, and this new trend is unlike many others.	Simply put, it involves Burt's Bees Peppermint lip balm.	"When you beeze, it's like your eyes are eating a York peppermint patty," senior Dilan Hettiarachchi said.	"There is just this cool, minty sensation on your eyelids.	0	0	0	0	0	0	0	0	0	0	0	0	0	0	0	0	0	0	0	0	0	0	0	0	0	0	0	0	0	0	0	0	0	0	0	0	0	0	0	0
577	tron-02266	“Beezing” Trend Among Teens	true	4	"When you beeze, it's like your eyes are eating a York peppermint patty," senior Dilan Hettiarachchi said.	Simply put, it involves Burt's Bees Peppermint lip balm.	"Beezing," as it is called, is to spread Burt's Bees peppermint lip balm on one's eyelids to obtain a weird yet enticing sensation.	"There is just this cool, minty sensation on your eyelids.	" With its unknown origin, Beezing is a trend not only at CHS, but also around the country, with stories of Beezing coming from the states of New Jersey and New York.	0	0	0	0	0	0	0	0	0	0	0	0	0	0	0	0	0	0	0	0	0	0	0	0	0	0	0	0	0	0	0	0	0	0	0	0	0	0	0	0
578	tron-02266	“Beezing” Trend Among Teens	true	5	"There is just this cool, minty sensation on your eyelids.	"Beezing," as it is called, is to spread Burt's Bees peppermint lip balm on one's eyelids to obtain a weird yet enticing sensation.	"When you beeze, it's like your eyes are eating a York peppermint patty," senior Dilan Hettiarachchi said.	" With its unknown origin, Beezing is a trend not only at CHS, but also around the country, with stories of Beezing coming from the states of New Jersey and New York.	Nevertheless, it is quickly spreading throughout the CHS population.	0	0	0	0	0	0	0	0	0	0	0	0	0	0	0	0	0	0	0	0	0	0	0	0	0	0	0	0	0	0	0	0	0	0	0	0	0	0	0	0
579	tron-02266	“Beezing” Trend Among Teens	true	6	" With its unknown origin, Beezing is a trend not only at CHS, but also around the country, with stories of Beezing coming from the states of New Jersey and New York.	"When you beeze, it's like your eyes are eating a York peppermint patty," senior Dilan Hettiarachchi said.	"There is just this cool, minty sensation on your eyelids.	Nevertheless, it is quickly spreading throughout the CHS population.	"I found out about beezing from my friends on cross country," junior Eric Murray said.	0	0	0	0	0	0	0	0	0	0	0	0	0	0	0	0	0	0	0	0	0	0	0	0	0	0	0	0	0	0	0	0	0	0	0	0	0	0	0	0
580	tron-02266	“Beezing” Trend Among Teens	true	7	Nevertheless, it is quickly spreading throughout the CHS population.	"There is just this cool, minty sensation on your eyelids.	" With its unknown origin, Beezing is a trend not only at CHS, but also around the country, with stories of Beezing coming from the states of New Jersey and New York.	"I found out about beezing from my friends on cross country," junior Eric Murray said.	"I now beeze twice a week.	0	0	0	0	0	0	0	0	0	0	0	0	0	0	0	0	0	0	0	0	0	0	0	0	0	0	0	0	0	0	0	0	0	0	0	0	0	0	0	0
581	tron-02266	“Beezing” Trend Among Teens	true	8	"I found out about beezing from my friends on cross country," junior Eric Murray said.	" With its unknown origin, Beezing is a trend not only at CHS, but also around the country, with stories of Beezing coming from the states of New Jersey and New York.	Nevertheless, it is quickly spreading throughout the CHS population.	"I now beeze twice a week.	" The usage of the words "beezing" and "stung"-a word that describes the state after which you have applied the lip balm to the eyelids- may make beezing sound unhealthy and dangerous.	0	0	0	0	0	0	0	0	0	0	0	0	0	0	0	0	0	0	0	0	0	0	0	0	0	0	0	0	0	0	0	0	0	0	0	0	0	0	0	0
582	tron-02266	“Beezing” Trend Among Teens	true	9	"I now beeze twice a week.	Nevertheless, it is quickly spreading throughout the CHS population.	"I found out about beezing from my friends on cross country," junior Eric Murray said.	" The usage of the words "beezing" and "stung"-a word that describes the state after which you have applied the lip balm to the eyelids- may make beezing sound unhealthy and dangerous.	This, however, is completely contrary to the truth.	0	0	0	0	0	0	0	0	0	0	0	0	0	0	0	0	0	0	0	0	0	0	0	0	0	0	0	0	0	0	0	0	0	0	0	0	0	0	0	0
583	tron-02266	“Beezing” Trend Among Teens	true	10	" The usage of the words "beezing" and "stung"-a word that describes the state after which you have applied the lip balm to the eyelids- may make beezing sound unhealthy and dangerous.	"I found out about beezing from my friends on cross country," junior Eric Murray said.	"I now beeze twice a week.	This, however, is completely contrary to the truth.	There is no health effect; the only effect of beezing is the sensation on the eyelids.	0	0	0	0	0	0	0	0	0	0	0	0	0	0	0	0	0	0	0	0	0	0	0	0	0	0	0	0	0	0	0	0	0	0	0	0	0	0	0	0
584	tron-02266	“Beezing” Trend Among Teens	true	11	This, however, is completely contrary to the truth.	"I now beeze twice a week.	" The usage of the words "beezing" and "stung"-a word that describes the state after which you have applied the lip balm to the eyelids- may make beezing sound unhealthy and dangerous.	There is no health effect; the only effect of beezing is the sensation on the eyelids.	According to a Burt's Bees representative, Burt's Bees "does not make any claims about putting the lip balm on the eyelids.	0	0	0	0	0	0	0	0	0	0	0	0	0	0	0	0	0	0	0	0	0	0	0	0	0	0	0	0	0	0	0	0	0	0	0	0	0	0	0	0
585	tron-02266	“Beezing” Trend Among Teens	true	12	There is no health effect; the only effect of beezing is the sensation on the eyelids.	" The usage of the words "beezing" and "stung"-a word that describes the state after which you have applied the lip balm to the eyelids- may make beezing sound unhealthy and dangerous.	This, however, is completely contrary to the truth.	According to a Burt's Bees representative, Burt's Bees "does not make any claims about putting the lip balm on the eyelids.	" "There is no downside to beezing," Murray said.	0	0	0	0	0	0	0	1	0	0	0	0	0	0	0	0	0	0	0	0	0	0	1	0	0	0	0	0	0	0	0	0	0	0	0	0	0	0	0	0
586	tron-02266	“Beezing” Trend Among Teens	true	13	According to a Burt's Bees representative, Burt's Bees "does not make any claims about putting the lip balm on the eyelids.	This, however, is completely contrary to the truth.	There is no health effect; the only effect of beezing is the sensation on the eyelids.	" "There is no downside to beezing," Murray said.	"The only effect is the cool, minty sensation on the eyelids.	0	0	0	0	0	0	0	0	0	0	0	0	0	0	0	0	0	0	0	0	0	0	0	0	0	0	0	0	0	0	0	0	0	0	0	0	0	0	0	0
587	tron-02266	“Beezing” Trend Among Teens	true	14	" "There is no downside to beezing," Murray said.	There is no health effect; the only effect of beezing is the sensation on the eyelids.	According to a Burt's Bees representative, Burt's Bees "does not make any claims about putting the lip balm on the eyelids.	"The only effect is the cool, minty sensation on the eyelids.	" The common perception about beezing is that the minty, burning feeling on the eyelids helps keep the person alert and focused.	0	0	0	0	0	0	0	1	0	0	0	0	0	0	0	0	0	0	0	0	0	0	0	0	0	0	0	0	0	0	0	0	0	0	0	0	0	0	0	0
588	tron-02266	“Beezing” Trend Among Teens	true	15	"The only effect is the cool, minty sensation on the eyelids.	According to a Burt's Bees representative, Burt's Bees "does not make any claims about putting the lip balm on the eyelids.	" "There is no downside to beezing," Murray said.	" The common perception about beezing is that the minty, burning feeling on the eyelids helps keep the person alert and focused.	"I beeze to stay awake," senior Nikhil Perincherry said.	0	0	0	0	0	0	0	1	0	0	0	0	0	0	0	0	0	0	0	0	0	0	1	0	0	0	0	0	0	0	0	0	0	0	0	0	0	0	0	0
589	tron-02266	“Beezing” Trend Among Teens	true	16	" The common perception about beezing is that the minty, burning feeling on the eyelids helps keep the person alert and focused.	" "There is no downside to beezing," Murray said.	"The only effect is the cool, minty sensation on the eyelids.	"I beeze to stay awake," senior Nikhil Perincherry said.	"It helps me to stay alert and always be on my 'A' game.	0	0	0	0	0	0	0	1	0	0	0	0	0	0	0	0	0	0	0	0	0	0	1	0	0	0	0	0	0	0	0	0	0	0	0	0	0	0	0	0
590	tron-02266	“Beezing” Trend Among Teens	true	17	"I beeze to stay awake," senior Nikhil Perincherry said.	"The only effect is the cool, minty sensation on the eyelids.	" The common perception about beezing is that the minty, burning feeling on the eyelids helps keep the person alert and focused.	"It helps me to stay alert and always be on my 'A' game.	" As with all trends, many students in the CHS community are opposed to beezing because they perceive it as unsophisticated.	0	0	0	0	0	0	0	0	0	0	0	0	0	0	0	0	0	0	0	0	0	0	0	0	0	0	0	0	0	0	0	0	0	0	0	0	0	0	0	0
591	tron-02266	“Beezing” Trend Among Teens	true	18	"It helps me to stay alert and always be on my 'A' game.	" The common perception about beezing is that the minty, burning feeling on the eyelids helps keep the person alert and focused.	"I beeze to stay awake," senior Nikhil Perincherry said.	" As with all trends, many students in the CHS community are opposed to beezing because they perceive it as unsophisticated.	"The premise of beezing is one that appears to be very dumb since it is not something that you usually see," junior Olivia Shannon said.	0	0	0	0	0	0	0	0	0	0	0	0	0	0	0	0	0	0	0	0	0	0	0	0	0	0	0	0	0	0	0	0	0	0	0	0	0	0	0	0
592	tron-02266	“Beezing” Trend Among Teens	true	19	" As with all trends, many students in the CHS community are opposed to beezing because they perceive it as unsophisticated.	"I beeze to stay awake," senior Nikhil Perincherry said.	"It helps me to stay alert and always be on my 'A' game.	"The premise of beezing is one that appears to be very dumb since it is not something that you usually see," junior Olivia Shannon said.	However, many opponents of the fad find no reason for people not to try beezing other than the possibility of looking strange while doing it.	0	0	0	0	0	0	0	0	0	0	0	0	0	0	0	0	0	0	0	0	0	0	0	0	0	0	0	0	0	0	0	0	0	0	0	0	0	0	0	0
593	tron-02266	“Beezing” Trend Among Teens	true	20	"The premise of beezing is one that appears to be very dumb since it is not something that you usually see," junior Olivia Shannon said.	"It helps me to stay alert and always be on my 'A' game.	" As with all trends, many students in the CHS community are opposed to beezing because they perceive it as unsophisticated.	However, many opponents of the fad find no reason for people not to try beezing other than the possibility of looking strange while doing it.	"It is something people should try at least once to experience," Shannon said.	0	0	0	0	0	0	0	0	0	0	0	0	0	0	0	0	0	0	0	0	0	0	0	0	0	0	0	0	0	0	0	0	0	0	0	0	0	0	0	0
594	tron-02266	“Beezing” Trend Among Teens	true	21	However, many opponents of the fad find no reason for people not to try beezing other than the possibility of looking strange while doing it.	" As with all trends, many students in the CHS community are opposed to beezing because they perceive it as unsophisticated.	"The premise of beezing is one that appears to be very dumb since it is not something that you usually see," junior Olivia Shannon said.	"It is something people should try at least once to experience," Shannon said.	"It is a very interesting feeling.	0	0	0	0	0	0	0	0	0	0	0	0	0	0	0	0	0	0	0	0	0	0	0	0	0	0	0	0	0	0	0	0	0	0	0	0	0	0	0	0
595	tron-02266	“Beezing” Trend Among Teens	true	22	"It is something people should try at least once to experience," Shannon said.	"The premise of beezing is one that appears to be very dumb since it is not something that you usually see," junior Olivia Shannon said.	However, many opponents of the fad find no reason for people not to try beezing other than the possibility of looking strange while doing it.	"It is a very interesting feeling.	" Whether or not beezing is just another fad to come and go through the halls of CHS is a mystery, but its legacy is one that will leave an impact on the students who have tried it.	0	0	0	0	0	0	0	0	0	0	0	0	0	0	0	0	0	0	0	0	0	0	0	0	0	0	0	0	0	0	0	0	0	0	0	0	0	0	0	0
596	tron-02266	“Beezing” Trend Among Teens	true	23	"It is a very interesting feeling.	However, many opponents of the fad find no reason for people not to try beezing other than the possibility of looking strange while doing it.	"It is something people should try at least once to experience," Shannon said.	" Whether or not beezing is just another fad to come and go through the halls of CHS is a mystery, but its legacy is one that will leave an impact on the students who have tried it.	"To quote rapper Rich Homie Quan, beezing makes me feel some type of way," Murray said.	0	0	0	0	0	0	0	0	0	0	0	0	0	0	0	0	0	0	0	0	0	0	0	0	0	0	0	0	0	0	0	0	0	0	0	0	0	0	0	0
597	tron-02266	“Beezing” Trend Among Teens	true	24	" Whether or not beezing is just another fad to come and go through the halls of CHS is a mystery, but its legacy is one that will leave an impact on the students who have tried it.	"It is something people should try at least once to experience," Shannon said.	"It is a very interesting feeling.	"To quote rapper Rich Homie Quan, beezing makes me feel some type of way," Murray said.		0	0	0	0	0	0	0	0	0	0	0	0	0	0	0	0	0	0	0	0	0	0	0	0	0	0	0	0	0	0	0	0	0	0	0	0	0	0	0	0
598	tron-02266	“Beezing” Trend Among Teens	true	25	"To quote rapper Rich Homie Quan, beezing makes me feel some type of way," Murray said.	"It is a very interesting feeling.	" Whether or not beezing is just another fad to come and go through the halls of CHS is a mystery, but its legacy is one that will leave an impact on the students who have tried it.			0	0	0	0	0	0	0	0	0	0	0	0	0	0	0	0	0	0	0	0	0	0	0	0	0	0	0	0	0	0	0	0	0	0	0	0	0	0	0	0
599	snes-01172	Sushi Fanatic Pulls 5-Foot-Long Tapeworm Out of His Body	true	0	Five-foot long tapeworm came 'wiggling out' of man's body after he ate sushi Sushi lovers beware!			A California man who ate sushi every day ended up with a 5-foot-plus long tapeworm inhabiting his body.	The Fresno male went to the emergency room complaining of bloody diarrhea, according to Dr. Kenny Bahn, who shared the story of his patient on the podcast <a>"This Won't Hurt A Bit."	1	0	0	0	0	0	0	0	0	1	0	0	0	1	0	0	0	0	0	0	0	0	0	0	0	0	0	0	0	0	0	0	1	0	0	0	0	0	0	0
600	snes-01172	Sushi Fanatic Pulls 5-Foot-Long Tapeworm Out of His Body	true	1	A California man who ate sushi every day ended up with a 5-foot-plus long tapeworm inhabiting his body.		Five-foot long tapeworm came 'wiggling out' of man's body after he ate sushi Sushi lovers beware!	The Fresno male went to the emergency room complaining of bloody diarrhea, according to Dr. Kenny Bahn, who shared the story of his patient on the podcast <a>"This Won't Hurt A Bit."	<a>	1	0	0	0	0	0	0	0	0	0	0	0	0	1	0	0	0	0	0	0	0	0	0	0	0	0	0	0	0	0	0	0	0	0	0	0	0	0	0	0
601	snes-01172	Sushi Fanatic Pulls 5-Foot-Long Tapeworm Out of His Body	true	2	The Fresno male went to the emergency room complaining of bloody diarrhea, according to Dr. Kenny Bahn, who shared the story of his patient on the podcast <a>"This Won't Hurt A Bit."	Five-foot long tapeworm came 'wiggling out' of man's body after he ate sushi Sushi lovers beware!	A California man who ate sushi every day ended up with a 5-foot-plus long tapeworm inhabiting his body.	<a>	The emergency room physician was initially skeptical when the man insisted to residents at Community Regional Medical Center, "I really want to get treated for worms" - until he saw for himself the disgusting proof.	1	0	0	0	0	0	0	0	0	0	0	1	0	1	0	0	0	0	0	0	0	0	0	0	0	0	0	0	0	0	0	0	0	0	0	0	0	0	1	0
[truncated: 5,069 more rows]
[truncated: 12 more columns]
